# Supplementary material for: Exploring the Limitations of Peripheral Blood Transcriptional Biomarkers in Predicting Influenza Vaccine Responsiveness
Source: Hindawi journal article supplement (doi:10.1155/2017/3017632), 2017-01-01
Supplement: f1 [file 3017632.f1.zip]

Archive with 4 entries (4 files):
- Supplementary_File_S1.xlsx
- Supplementary_File_S2.xlsx
- Supplementary_File_S3.xlsx
- Supplementary_File_S4.xlsx
