# Supplementary material for: Exploring the Limitations of Peripheral Blood Transcriptional Biomarkers in Predicting Influenza Vaccine Responsiveness
Source: Hindawi journal article supplement (doi:10.1155/2017/3017632), 2017-01-01
Supplement: f1 [file 3017632.f1.zip › Supplementary_File_S1.xlsx]

## Sheet: Biomarker
Biomarker length	207
Misclassified subjects (training set)	0
Misclassified subjects (validation set)	2	Low_Subject.39, High_Subject.29
Permutation test p-value (10000 trials)	0
Filtering statistical test	Wilcoxon
Threshold p-value	0.00158512
Probes	Gene symbol	Considered value	Log fold-change (High/Low responders)	Wilcoxon p-value
1552476_s_at	PLCD3	day 3/day 0	0.283996	0.000515996
1553266_at	CNOT6L	day 3/day 0	-0.2667	0.000294855
1553865_a_at	GPR26	day 3/day 0	0.495933	0.000159713
1554203_at	NCRNA00110	day 3/day 0	-0.258166	0.00140056
1554808_at	ACP1	day 3/day 0	-0.461565	0.000515996
1555470_a_at	PPM1F	day 3/day 0	0.279555	0.000515996
1557380_at	AGAP11	day 3/day 0	0.280838	0.000190427
1558496_at		day 3/day 0	0.287481	0.000884564
1558622_a_at	ZNF548	day 3/day 0	-0.557539	0.000515996
1559689_a_at	GRAPL	day 3/day 0	-0.145166	0.000294855
1559785_at	TPPP2	day 3/day 0	-0.205438	0.000294855
1562338_at	MARCH1	day 3/day 0	0.266108	0.00104428
1566303_s_at	PPP1R11	day 3/day 0	0.559229	0.000319426
1568680_s_at	YTHDC2	day 3/day 0	-0.485954	0.00140056
1568807_a_at		day 3/day 0	-0.445718	0.000515996
200711_s_at	SKP1	day 3/day 0	-0.300642	0.00070028
200848_at	AHCYL1	day 3/day 0	0.408443	0.000884564
201083_s_at	BCLAF1	day 3/day 0	-0.680725	0.00130228
201092_at	RBBP7	day 3/day 0	-0.269863	0.000319426
201403_s_at	MGST3	day 3/day 0	0.314586	0.000884564
201499_s_at	USP7	day 3/day 0	-0.288362	0.00104428
201682_at	PMPCB	day 3/day 0	-0.360261	0.000884564
201804_x_at	TBCB	day 3/day 0	0.17345	0.00140056
202395_at	NSF	day 3/day 0	0.409091	0.00140056
202684_s_at	RNMT	day 3/day 0	-0.644273	0.000294855
202992_at	C7	day 3/day 0	0.328525	0.000884564
203000_at	STMN2	day 3/day 0	-0.059339	0.00140056
203515_s_at	PMVK	day 3/day 0	0.387962	0.00140056
203599_s_at	WBP4	day 3/day 0	-0.390036	0.000884564
204215_at	C7orf23	day 3/day 0	-0.573616	0.00140056
204385_at	KYNU	day 3/day 0	0.523629	0.000294855
204747_at	IFIT3	day 3/day 0	1.65803	0.00140056
204759_at	RCBTB2	day 3/day 0	0.446939	0.00140056
205432_at	OVGP1	day 3/day 0	-0.339891	0.000122856
206023_at	NMU	day 3/day 0	-0.133056	0.00140056
206662_at	GLRX	day 3/day 0	0.41225	0.00140056
206687_s_at	PTPN6	day 3/day 0	0.401597	0.00140056
207092_at	LEP	day 3/day 0	-0.134473	0.000958278
208622_s_at	EZR	day 3/day 0	-0.585045	0.000884564
208662_s_at	TTC3	day 3/day 0	-0.428873	0.000601995
209238_at	STX3	day 3/day 0	0.772862	0.000515996
209640_at	PML	day 3/day 0	0.299	0.00140056
209695_at	PTP4A3	day 3/day 0	0.295944	0.00140056
210281_s_at	ZMYM2	day 3/day 0	-0.635377	0.00140056
210349_at	CAMK4	day 3/day 0	-0.870061	0.000884564
211220_s_at	HSF2	day 3/day 0	-0.448452	0.000884564
211263_s_at	PCSK6	day 3/day 0	-0.162998	0.00070028
211320_s_at	PTPRU	day 3/day 0	-0.491108	0.00140056
212239_at	PIK3R1	day 3/day 0	-0.822456	0.000515996
212406_s_at	PCMTD2	day 3/day 0	-0.502314	0.000884564
212451_at	SECISBP2L	day 3/day 0	-0.61575	0.000884564
212452_x_at	MYST4	day 3/day 0	-0.528297	0.00140056
212462_at	MYST4	day 3/day 0	-0.55752	0.000601995
212552_at	HPCAL1	day 3/day 0	0.362474	0.000319426
212752_at	CLASP1	day 3/day 0	-0.446507	0.000884564
212758_s_at	ZEB1	day 3/day 0	-0.773155	0.00140056
212773_s_at	TOMM20	day 3/day 0	-0.423908	0.00140056
212948_at	CAMTA2	day 3/day 0	0.346402	0.000515996
213097_s_at	DNAJC2	day 3/day 0	-0.608807	0.00104428
214499_s_at	BCLAF1	day 3/day 0	-0.52106	0.00140056
215271_at	TNN	day 3/day 0	0.164416	0.00140056
216279_at	ZNF460	day 3/day 0	-0.241886	0.000601995
216918_s_at	DST	day 3/day 0	0.351393	0.00140056
217019_at	RPS4X /// RPS4XP6	day 3/day 0	-0.426123	0.00140056
218430_s_at	RFX7	day 3/day 0	-0.741573	0.00140056
218809_at	PANK2	day 3/day 0	0.530033	0.000884564
218863_s_at	TNS1	day 3/day 0	-0.179359	0.00104428
219554_at	RHCG	day 3/day 0	-0.240592	0.000319426
219652_s_at	CXorf36	day 3/day 0	0.232476	0.00140056
220250_at	ZNF286A	day 3/day 0	0.329947	0.000884564
220370_s_at	USP36	day 3/day 0	-0.466127	0.00140056
221381_s_at	MORF4 /// MORF4L1	day 3/day 0	-0.368349	0.000122856
221535_at	LSG1	day 3/day 0	-0.654566	0.00140056
222905_s_at	TMEM143	day 3/day 0	0.247498	0.00140056
223014_at	UBE2R2	day 3/day 0	0.507893	0.000294855
223138_s_at	DHX36	day 3/day 0	-0.500737	0.000884564
223393_s_at	TSHZ3	day 3/day 0	0.443887	0.00140056
223684_s_at	SMUG1	day 3/day 0	0.247065	0.000884564
223886_s_at	RNF146	day 3/day 0	0.340147	0.00140056
224194_at	FCRL2	day 3/day 0	0.325168	0.000122856
224250_s_at	SECISBP2	day 3/day 0	-0.341904	0.000515996
224285_at	GPR174	day 3/day 0	-0.339496	0.00140056
224568_x_at	MALAT1	day 3/day 0	-0.738638	0.00104428
224903_at	CIRH1A	day 3/day 0	-0.42692	0.000319426
224927_at	KIAA1949	day 3/day 0	0.484089	0.000884564
225229_at	AFF4	day 3/day 0	-0.411135	0.000159713
225530_at	MOBKL2A	day 3/day 0	0.40051	0.000515996
225698_at	NCRNA00219	day 3/day 0	-0.533271	0.00140056
225801_at		day 3/day 0	-0.369381	0.000515996
225850_at	SFT2D1	day 3/day 0	0.54608	0.00140056
226331_at	BBX	day 3/day 0	-0.492455	0.000515996
226586_at	ANKS6	day 3/day 0	-0.404672	0.000294855
228499_at	PFKFB4	day 3/day 0	0.775113	0.00140056
228512_at	PTCD3	day 3/day 0	-0.620678	0.00140056
228549_at		day 3/day 0	-0.714443	0.000515996
228814_at	RBBP6	day 3/day 0	-0.37632	0.00070028
229070_at	C6orf105	day 3/day 0	-0.758545	0.00114256
229274_at	GNAS	day 3/day 0	-0.735289	0.000159713
230301_at		day 3/day 0	0.448862	0.000294855
230788_at	GCNT2	day 3/day 0	0.505177	0.00140056
233176_at		day 3/day 0	0.431132	0.000515996
234122_at		day 3/day 0	0.325417	0.000884564
234755_x_at		day 3/day 0	-0.159469	0.000884564
235430_at	C14orf43	day 3/day 0	-0.184147	0.000319426
235567_at	RORA	day 3/day 0	-0.890977	0.00140056
235630_at		day 3/day 0	-0.432722	0.00140056
235637_s_at		day 3/day 0	0.171579	0.000601995
235938_at		day 3/day 0	-0.329804	0.000515996
236065_at		day 3/day 0	0.372699	0.000884564
236613_at	RBM25	day 3/day 0	-0.540201	0.000884564
236800_at	UCMA	day 3/day 0	0.360168	0.000515996
237020_at	TMEM146	day 3/day 0	0.224388	0.00140056
237895_at		day 3/day 0	-0.648453	0.00140056
238527_at		day 3/day 0	0.272756	0.000601995
239039_at		day 3/day 0	-0.213744	0.000380854
239117_at		day 3/day 0	0.412852	0.000319426
240113_at		day 3/day 0	0.29509	0.00140056
241089_at		day 3/day 0	0.167528	0.00140056
241809_at	C1orf183	day 3/day 0	0.441095	0.00140056
242961_x_at	DDX58	day 3/day 0	0.699868	0.000294855
243439_at	ZNF418	day 3/day 0	0.206004	0.00104428
243662_at		day 3/day 0	0.301807	0.000515996
244719_at		day 3/day 0	0.331298	0.000601995
35265_at	FXR2	day 3/day 0	0.292789	0.000884564
41577_at	PPP1R16B	day 3/day 0	-0.354899	0.00140056
1552789_at	SEC62	day 7/day 0	0.191507	0.000884564
1553886_at	CCDC108	day 7/day 0	0.191386	0.00104428
1555904_at		day 7/day 0	0.239208	0.000884564
1557512_at		day 7/day 0	-0.366616	0.00140056
1557536_at	WNK2	day 7/day 0	0.338617	0.000515996
1557821_at	LOC283547	day 7/day 0	0.191929	0.00140056
1558116_x_at	RECK	day 7/day 0	-0.197995	0.000884564
1559675_at		day 7/day 0	0.455024	0.00140056
1560185_at		day 7/day 0	0.217907	0.000601995
1560713_a_at	ELFN2	day 7/day 0	0.244876	0.000245712
1561463_at		day 7/day 0	0.069744	0.00140056
1563222_at		day 7/day 0	-0.431913	0.000122856
1563632_at	LOC220980	day 7/day 0	0.240785	0.000515996
1564637_a_at	FAM98B	day 7/day 0	-0.578361	0.000884564
1565706_at		day 7/day 0	-0.416396	0.000515996
1568916_at	SPIRE2	day 7/day 0	-0.220103	0.000294855
200666_s_at	DNAJB1	day 7/day 0	-0.537687	0.00140056
202730_s_at	PDCD4	day 7/day 0	-0.328906	0.000884564
203125_x_at	SLC11A2	day 7/day 0	-0.532712	0.000294855
204083_s_at	TPM2	day 7/day 0	-0.663412	0.000515996
205611_at	TNFSF12	day 7/day 0	0.319923	0.000159713
206070_s_at	EPHA3	day 7/day 0	0.161798	0.00140056
206993_at	ATP5S	day 7/day 0	-0.270095	0.000319426
208034_s_at	PROZ	day 7/day 0	0.15375	0.000884564
208262_x_at	MEFV	day 7/day 0	0.468351	0.000884564
209173_at	AGR2	day 7/day 0	0.368949	0.00070028
209335_at	DCN	day 7/day 0	0.165723	0.000515996
210424_s_at	GOLGA8A /// GOLGA8B	day 7/day 0	-0.860922	0.000122856
211610_at	KLF6	day 7/day 0	-1.15865	0.000405425
212286_at	ANKRD12	day 7/day 0	-0.410722	0.000515996
216699_s_at	KLK1	day 7/day 0	0.364937	0.000122856
217973_at	DCXR	day 7/day 0	0.244051	0.000884564
218018_at	PDXK	day 7/day 0	0.563419	0.000884564
218169_at	VAC14	day 7/day 0	-0.391344	0.000319426
218556_at	ORMDL2	day 7/day 0	0.449597	0.000319426
218585_s_at	DTL	day 7/day 0	0.543849	0.000159713
219668_at	GDAP1L1	day 7/day 0	0.373684	0.000294855
220458_at		day 7/day 0	-0.475035	0.00140056
220566_at	PIK3R5	day 7/day 0	-0.462169	0.000515996
220634_at	TBX4	day 7/day 0	0.384775	0.00140056
221058_s_at	CKLF	day 7/day 0	0.429113	0.000319426
221520_s_at	CDCA8	day 7/day 0	0.42671	0.000122856
225246_at	STIM2	day 7/day 0	-0.285166	0.000884564
225588_s_at	TMEM129	day 7/day 0	-0.429521	0.000319426
226433_at	RNF157	day 7/day 0	-0.555336	0.000515996
227517_s_at	GAS5	day 7/day 0	-0.566901	0.000515996
227607_at	STAMBPL1	day 7/day 0	-0.688115	0.00140056
227653_at	TRMT5	day 7/day 0	0.192604	0.00104428
228782_at	SCGB3A2	day 7/day 0	0.252385	0.00140056
229728_at		day 7/day 0	-0.482216	0.00140056
231108_at	FUS	day 7/day 0	-0.685608	0.000380854
231724_at	MED26	day 7/day 0	-0.128358	0.000294855
232289_at	KCNJ12	day 7/day 0	0.427388	0.000884564
232955_at	FLJ41170	day 7/day 0	0.201049	0.000884564
233307_x_at		day 7/day 0	-0.347119	0.000909136
233390_at		day 7/day 0	-0.168191	0.00140056
233785_at	ADAMTS9	day 7/day 0	0.268187	0.000884564
234766_at	OR8D2	day 7/day 0	0.239751	0.000380854
234980_at	TMEM56	day 7/day 0	0.342378	0.000122856
235565_at	ZNF425	day 7/day 0	0.216996	0.000515996
236344_at	PDE1C	day 7/day 0	0.239147	0.000601995
236700_at	EIF3C	day 7/day 0	-0.49961	0.000515996
236889_at		day 7/day 0	-0.631374	0.000909136
237274_at	LOC100505547	day 7/day 0	0.286411	0.00140056
237358_at		day 7/day 0	0.207097	0.00104428
237869_at	A2LD1	day 7/day 0	-0.22341	0.000884564
238027_at	SPATA24	day 7/day 0	-0.362654	0.000122856
238355_at	RBM39	day 7/day 0	-0.307249	0.000294855
238563_at		day 7/day 0	-0.388442	0.000159713
238880_at	GTF3A	day 7/day 0	-0.392344	0.00140056
239117_at		day 7/day 0	0.268325	0.000122856
239635_at	RBM14	day 7/day 0	-0.704182	0.000245712
239804_at		day 7/day 0	-0.71299	0.00140056
240316_at	C9orf57	day 7/day 0	0.186972	0.00104428
240854_x_at		day 7/day 0	0.289936	0.000122856
242433_at	ZBTB11	day 7/day 0	-0.511503	0.00140056
242657_at		day 7/day 0	0.210475	0.000884564
242701_at	TBRG1	day 7/day 0	-0.440912	0.000294855
243672_at	SALL3	day 7/day 0	0.201279	0.00140056
244309_at		day 7/day 0	-0.154633	0.000122856
244677_at		day 7/day 0	-0.672125	0.00140056
40612_at	DOPEY1	day 7/day 0	-0.153546	0.000515996

## Sheet: Gene ontology enrichment
Gene ontology (entires with >1 mapped genes are shown)	Pathway Id	Source Name	Organism	Pathway uploaded gene count	Genes in InnateDB for this entity	Pathway p-value	Pathway p-value (corrected)	Gene Symbols	Genes (Symbol|IDBG-ID|Ensembl|Entrez|Fold Change|P-Value)
regulation of microtubule polymerization or depolymerization	GO:0031110	biological process	9606	2	10	0.00271903	0.35287	DST; STMN2;	DST|IDBG-91303|ENSG00000151914|667|; STMN2|IDBG-26222|ENSG00000104435|11075|;
regulation of phosphatidylinositol 3-kinase activity	GO:0043551	biological process	9606	2	10	0.00271903	0.35287	PIK3R1; PIK3R5;	PIK3R1|IDBG-25037|ENSG00000145675|5295|; PIK3R5|IDBG-29574|ENSG00000141506|23533|;
secretion by cell	GO:0032940	biological process	9606	2	10	0.00271903	0.35287	CKLF; PCSK6;	CKLF|IDBG-281643|ENSG00000217555|51192|; PCSK6|IDBG-32449|ENSG00000140479|100507472,5046|;
transcription, DNA-templated	GO:0006351	biological process	9606	27	1938	0.00277811	0.324484	BBX; BCLAF1; CAMTA2; CIRH1A; CNOT6L; DHX36; DNAJC2; ELMSAN1; KAT6B; KLF6; MED26; MORF4L1; PML; RBBP7; RBM39; RORA; SALL3; SPATA24; TBX4; TSHZ3; ZBTB11; ZEB1; ZMYM2; ZNF418; ZNF425; ZNF460; ZNF548;	BBX|IDBG-48577|ENSG00000114439|56987|; BCLAF1|IDBG-96919|ENSG00000029363|9774|; CAMTA2|IDBG-20579|ENSG00000108509|23125|; CIRH1A|IDBG-38880|ENSG00000141076|84916|; CNOT6L|IDBG-25831|ENSG00000138767|246175|; DHX36|IDBG-62011|ENSG00000174953|170506|; DNAJC2|IDBG-34312|ENSG00000105821|27000|; ELMSAN1|IDBG-11661|ENSG00000156030|91748|; KAT6B|IDBG-79073|ENSG00000156650|23522|; KLF6|IDBG-46758|ENSG0000…
protein K48-linked ubiquitination	GO:0070936	biological process	9606	3	41	0.00422953	0.352864	RNF146; TTC3; UBE2R2;	RNF146|IDBG-96179|ENSG00000118518|81847|; TTC3|IDBG-3083|ENSG00000182670|286495,7267|; UBE2R2|IDBG-58571|ENSG00000107341|54926|;
regulation of T cell differentiation in thymus	GO:0033081	biological process	9606	2	5	0.0062	0.144893	CAMK4; ZEB1;	CAMK4|IDBG-36661|ENSG00000152495|814|; ZEB1|IDBG-66941|ENSG00000148516|100996668,6935|;
positive regulation of defense response to virus by host	GO:0002230	biological process	9606	2	16	0.00702722	0.431989	DDX58; PML;	DDX58|IDBG-55854|ENSG00000107201|23586|; PML|IDBG-21462|ENSG00000140464|5371|;
negative regulation of microtubule depolymerization	GO:0007026	biological process	9606	2	17	0.00792282	0.462693	CLASP1; STMN2;	CLASP1|IDBG-68461|ENSG00000074054|23332|; STMN2|IDBG-26222|ENSG00000104435|11075|;
DNA replication	GO:0006260	biological process	9606	5	155	0.00806095	0.128975	DNAJC2; DTL; RBBP7; RBM14; TBRG1;	DNAJC2|IDBG-34312|ENSG00000105821|27000|; DTL|IDBG-106535|ENSG00000143476|51514|; RBBP7|IDBG-47673|ENSG00000102054|5931|; RBM14|IDBG-409430|ENSG00000239306|10432|; TBRG1|IDBG-75180|ENSG00000154144|84897|;
phosphatidylinositol biosynthetic process	GO:0006661	biological process	9606	3	58	0.011098	0.166186	PIK3R1; PIK3R5; VAC14;	PIK3R1|IDBG-25037|ENSG00000145675|5295|; PIK3R5|IDBG-29574|ENSG00000141506|23533|; VAC14|IDBG-40481|ENSG00000103043|55697|;
protein monoubiquitination	GO:0006513	biological process	9606	2	22	0.0131119	0.193857	DTL; UBE2R2;	DTL|IDBG-106535|ENSG00000143476|51514|; UBE2R2|IDBG-58571|ENSG00000107341|54926|;
multicellular organism reproduction	GO:0032504	biological process	9606	2	23	0.0142864	0.206006	CATSPERD; OVGP1;	CATSPERD|IDBG-20604|ENSG00000174898|257062|; OVGP1|IDBG-101056|ENSG00000085465|5016|;
phosphatidylinositol 3-kinase signaling	GO:0014065	biological process	9606	2	23	0.0142864	0.206006	PIK3R1; PIK3R5;	PIK3R1|IDBG-25037|ENSG00000145675|5295|; PIK3R5|IDBG-29574|ENSG00000141506|23533|;
eating behavior	GO:0042755	biological process	9606	2	24	0.0155046	0.215587	LEP; NMU;	LEP|IDBG-39587|ENSG00000174697|3952|; NMU|IDBG-19638|ENSG00000109255|10874|;
histone deacetylation	GO:0016575	biological process	9606	2	24	0.0155046	0.215587	MORF4L1; RBM14;	MORF4L1|IDBG-25183|ENSG00000185787|10933|; RBM14|IDBG-409430|ENSG00000239306|10432|;
platelet aggregation	GO:0070527	biological process	9606	2	24	0.0155046	0.215587	GNAS; PTPN6;	GNAS|IDBG-82827|ENSG00000087460|2778|; PTPN6|IDBG-15719|ENSG00000111679|5777|;
negative regulation of transcription, DNA-templated	GO:0045892	biological process	9606	9	490	0.0167616	0.156621	BCLAF1; KAT6B; PDCD4; PML; PPM1F; RBBP7; TSHZ3; ZEB1; ZNF425;	BCLAF1|IDBG-96919|ENSG00000029363|9774|; KAT6B|IDBG-79073|ENSG00000156650|23522|; PDCD4|IDBG-89535|ENSG00000150593|100616113,27250|; PML|IDBG-21462|ENSG00000140464|5371|; PPM1F|IDBG-2163|ENSG00000100034|9647|; RBBP7|IDBG-47673|ENSG00000102054|5931|; TSHZ3|IDBG-42067|ENSG00000121297|57616|; ZEB1|IDBG-66941|ENSG00000148516|100996668,6935|; ZNF425|IDBG-47223|ENSG00000204947|155054|;
intracellular transport	GO:0046907	biological process	9606	2	26	0.0180691	0.167497	GNAS; SPIRE2;	GNAS|IDBG-82827|ENSG00000087460|2778|; SPIRE2|IDBG-48448|ENSG00000204991|84501|;
ubiquitin-dependent protein catabolic process	GO:0006511	biological process	9606	5	192	0.0188852	0.173685	DTL; SKP1; TTC3; USP36; USP7;	DTL|IDBG-106535|ENSG00000143476|51514|; SKP1|IDBG-44621|ENSG00000113558|6500|; TTC3|IDBG-3083|ENSG00000182670|286495,7267|; USP36|IDBG-70923|ENSG00000055483|57602|; USP7|IDBG-13958|ENSG00000187555|7874|;
cell aging	GO:0007569	biological process	9606	2	28	0.0207994	0.189795	PDCD4; PML;	PDCD4|IDBG-89535|ENSG00000150593|100616113,27250|; PML|IDBG-21462|ENSG00000140464|5371|;
innate immune response	GO:0045087	biological process	9606	18	1359	0.0229866	0.208126	AGR2; C7; CAMK4; DCN; DDX58; DHX36; GLRX; IFIT3; KLK1; LEP; MEFV; PDE1C; PIK3R1; PML; PTPN6; RORA; SCGB3A2; USP7;	AGR2|IDBG-8965|ENSG00000106541|10551|; C7|IDBG-18519|ENSG00000112936|730|; CAMK4|IDBG-36661|ENSG00000152495|814|; DCN|IDBG-50872|ENSG00000011465|1634|; DDX58|IDBG-55854|ENSG00000107201|23586|; DHX36|IDBG-62011|ENSG00000174953|170506|; GLRX|IDBG-34038|ENSG00000173221|2745|; IFIT3|IDBG-81919|ENSG00000119917|3437|; KLK1|IDBG-64886|ENSG00000167748|3816|; LEP|IDBG-39587|ENSG00000174697|3952|; MEFV|IDB…
positive regulation of extrinsic apoptotic signaling pathway	GO:2001238	biological process	9606	2	31	0.0251933	0.176202	PML; TNFSF12;	PML|IDBG-21462|ENSG00000140464|5371|; TNFSF12|IDBG-408330|ENSG00000239697|8742|;
protein dephosphorylation	GO:0006470	biological process	9606	4	142	0.0269645	0.186358	PPM1F; PTP4A3; PTPN6; PTPRU;	PPM1F|IDBG-2163|ENSG00000100034|9647|; PTP4A3|IDBG-37455|ENSG00000184489|11156|; PTPN6|IDBG-15719|ENSG00000111679|5777|; PTPRU|IDBG-95340|ENSG00000060656|10076|;
regulation of circadian rhythm	GO:0042752	biological process	9606	2	35	0.031579	0.167656	PML; RORA;	PML|IDBG-21462|ENSG00000140464|5371|; RORA|IDBG-14920|ENSG00000069667|6095|;
response to exogenous dsRNA	GO:0043330	biological process	9606	2	35	0.031579	0.167656	DDX58; DHX36;	DDX58|IDBG-55854|ENSG00000107201|23586|; DHX36|IDBG-62011|ENSG00000174953|170506|;
regulation of protein phosphorylation	GO:0001932	biological process	9606	2	36	0.033265	0.173453	LEP; PML;	LEP|IDBG-39587|ENSG00000174697|3952|; PML|IDBG-21462|ENSG00000140464|5371|;
female pregnancy	GO:0007565	biological process	9606	3	89	0.0342094	0.176799	GNAS; LEP; OVGP1;	GNAS|IDBG-82827|ENSG00000087460|2778|; LEP|IDBG-39587|ENSG00000174697|3952|; OVGP1|IDBG-101056|ENSG00000085465|5016|;
protein targeting	GO:0006605	biological process	9606	2	40	0.040348	0.178509	PML; TOMM20;	PML|IDBG-21462|ENSG00000140464|5371|; TOMM20|IDBG-107524|ENSG00000173726|9804|;
adenylate cyclase-activating G-protein coupled receptor signaling pathway	GO:0007189	biological process	9606	2	41	0.0422002	0.185999	GNAS; GPR26;	GNAS|IDBG-82827|ENSG00000087460|2778|; GPR26|IDBG-92567|ENSG00000154478|2849|;
negative regulation of cell proliferation	GO:0008285	biological process	9606	7	406	0.0441353	0.191636	IFIT3; PML; PTPN6; PTPRU; TBRG1; WNK2; ZEB1;	IFIT3|IDBG-81919|ENSG00000119917|3437|; PML|IDBG-21462|ENSG00000140464|5371|; PTPN6|IDBG-15719|ENSG00000111679|5777|; PTPRU|IDBG-95340|ENSG00000060656|10076|; TBRG1|IDBG-75180|ENSG00000154144|84897|; WNK2|IDBG-76524|ENSG00000165238|65268|; ZEB1|IDBG-66941|ENSG00000148516|100996668,6935|;
peptidyl-tyrosine dephosphorylation	GO:0035335	biological process	9606	3	99	0.0446432	0.192411	ACP1; PTP4A3; PTPRU;	ACP1|IDBG-25059|ENSG00000143727|52|; PTP4A3|IDBG-37455|ENSG00000184489|11156|; PTPRU|IDBG-95340|ENSG00000060656|10076|;
circadian regulation of gene expression	GO:0032922	biological process	9606	2	43	0.0459981	0.195366	PML; RORA;	PML|IDBG-21462|ENSG00000140464|5371|; RORA|IDBG-14920|ENSG00000069667|6095|;
regulation of transcription, DNA-templated	GO:0006355	biological process	9606	22	1898	0.0465499	0.196994	AFF4; BBX; CIRH1A; CNOT6L; ELMSAN1; GTF3A; HSF2; KAT6B; MORF4L1; PML; RBM39; RFX7; RORA; SALL3; SPATA24; TBX4; ZBTB11; ZMYM2; ZNF418; ZNF425; ZNF460; ZNF548;	AFF4|IDBG-43817|ENSG00000072364|27125|; BBX|IDBG-48577|ENSG00000114439|56987|; CIRH1A|IDBG-38880|ENSG00000141076|84916|; CNOT6L|IDBG-25831|ENSG00000138767|246175|; ELMSAN1|IDBG-11661|ENSG00000156030|91748|; GTF3A|IDBG-19126|ENSG00000122034|2971|; HSF2|IDBG-95987|ENSG00000025156|3298|; KAT6B|IDBG-79073|ENSG00000156650|23522|; MORF4L1|IDBG-25183|ENSG00000185787|10933|; PML|IDBG-21462|ENSG0000014046…
placenta development	GO:0001890	biological process	9606	2	44	0.0479425	0.182996	DCN; LEP;	DCN|IDBG-50872|ENSG00000011465|1634|; LEP|IDBG-39587|ENSG00000174697|3952|;
protein deubiquitination	GO:0016579	biological process	9606	2	47	0.0539509	0.203273	USP36; USP7;	USP36|IDBG-70923|ENSG00000055483|57602|; USP7|IDBG-13958|ENSG00000187555|7874|;
proton transport	GO:0015992	biological process	9606	2	47	0.0539509	0.203273	ATP5S; SLC11A2;	ATP5S|IDBG-5967|ENSG00000125375|27109|; SLC11A2|IDBG-32924|ENSG00000110911|4891|;
response to UV	GO:0009411	biological process	9606	2	48	0.0560101	0.190728	DTL; PML;	DTL|IDBG-106535|ENSG00000143476|51514|; PML|IDBG-21462|ENSG00000140464|5371|;
bone development	GO:0060348	biological process	9606	2	49	0.0580965	0.197258	BBX; GNAS;	BBX|IDBG-48577|ENSG00000114439|56987|; GNAS|IDBG-82827|ENSG00000087460|2778|;
protein targeting to mitochondrion	GO:0006626	biological process	9606	2	50	0.0602096	0.20384	PMPCB; TOMM20;	PMPCB|IDBG-34271|ENSG00000105819|9512|; TOMM20|IDBG-107524|ENSG00000173726|9804|;
protein ubiquitination involved in ubiquitin-dependent protein catabolic process	GO:0042787	biological process	9606	2	52	0.0645136	0.200938	RBBP6; RNF146;	RBBP6|IDBG-21023|ENSG00000122257|5930|; RNF146|IDBG-96179|ENSG00000118518|81847|;
protein homotetramerization	GO:0051289	biological process	9606	2	54	0.0689179	0.212391	DCXR; KCNJ12;	DCXR|IDBG-73075|ENSG00000169738|51181|; KCNJ12|IDBG-35680|ENSG00000184185|100996843,3768|;
negative regulation of cell growth	GO:0030308	biological process	9606	3	120	0.0710148	0.207363	DNAJC2; PML; RBBP7;	DNAJC2|IDBG-34312|ENSG00000105821|27000|; PML|IDBG-21462|ENSG00000140464|5371|; RBBP7|IDBG-47673|ENSG00000102054|5931|;
glucose metabolic process	GO:0006006	biological process	9606	3	121	0.072413	0.209872	DCXR; LEP; PFKFB4;	DCXR|IDBG-73075|ENSG00000169738|51181|; LEP|IDBG-39587|ENSG00000174697|3952|; PFKFB4|IDBG-32970|ENSG00000114268|5210|;
cell proliferation	GO:0008283	biological process	9606	6	370	0.0758757	0.218822	CKLF; MORF4L1; PDXK; PTPN6; RBBP7; ZEB1;	CKLF|IDBG-281643|ENSG00000217555|51192|; MORF4L1|IDBG-25183|ENSG00000185787|10933|; PDXK|IDBG-4833|ENSG00000160209|8566|; PTPN6|IDBG-15719|ENSG00000111679|5777|; RBBP7|IDBG-47673|ENSG00000102054|5931|; ZEB1|IDBG-66941|ENSG00000148516|100996668,6935|;
hydrogen ion transmembrane transport	GO:1902600	biological process	9606	2	58	0.0780103	0.216943	ATP5S; SLC11A2;	ATP5S|IDBG-5967|ENSG00000125375|27109|; SLC11A2|IDBG-32924|ENSG00000110911|4891|;
intrinsic apoptotic signaling pathway in response to DNA damage	GO:0008630	biological process	9606	2	58	0.0780103	0.216943	PIK3R1; PML;	PIK3R1|IDBG-25037|ENSG00000145675|5295|; PML|IDBG-21462|ENSG00000140464|5371|;
cell cycle arrest	GO:0007050	biological process	9606	3	128	0.0825413	0.228456	DST; PML; TBRG1;	DST|IDBG-91303|ENSG00000151914|667|; PML|IDBG-21462|ENSG00000140464|5371|; TBRG1|IDBG-75180|ENSG00000154144|84897|;
activation of phospholipase C activity	GO:0007202	biological process	9606	2	60	0.0826904	0.227789	CAMK4; PDE1C;	CAMK4|IDBG-36661|ENSG00000152495|814|; PDE1C|IDBG-11559|ENSG00000154678|5137|;
cellular response to retinoic acid	GO:0071300	biological process	9606	2	60	0.0826904	0.227789	EPHA3; LEP;	EPHA3|IDBG-45928|ENSG00000044524|2042|; LEP|IDBG-39587|ENSG00000174697|3952|;
dephosphorylation	GO:0016311	biological process	9606	4	207	0.0838017	0.230307	PFKFB4; PTP4A3; PTPN6; PTPRU;	PFKFB4|IDBG-32970|ENSG00000114268|5210|; PTP4A3|IDBG-37455|ENSG00000184489|11156|; PTPN6|IDBG-15719|ENSG00000111679|5777|; PTPRU|IDBG-95340|ENSG00000060656|10076|;
interferon-gamma-mediated signaling pathway	GO:0060333	biological process	9606	2	61	0.0850621	0.222764	PML; PTPN6;	PML|IDBG-21462|ENSG00000140464|5371|; PTPN6|IDBG-15719|ENSG00000111679|5777|;
sensory perception of smell	GO:0007608	biological process	9606	2	61	0.0850621	0.222764	GNAS; PDE1C;	GNAS|IDBG-82827|ENSG00000087460|2778|; PDE1C|IDBG-11559|ENSG00000154678|5137|;
type I interferon signaling pathway	GO:0060337	biological process	9606	2	63	0.0898668	0.23482	IFIT3; PTPN6;	IFIT3|IDBG-81919|ENSG00000119917|3437|; PTPN6|IDBG-15719|ENSG00000111679|5777|;
circadian rhythm	GO:0007623	biological process	9606	2	64	0.0922987	0.2284	LEP; RORA;	LEP|IDBG-39587|ENSG00000174697|3952|; RORA|IDBG-14920|ENSG00000069667|6095|;
spermatid development	GO:0007286	biological process	9606	2	64	0.0922987	0.2284	AFF4; PANK2;	AFF4|IDBG-43817|ENSG00000072364|27125|; PANK2|IDBG-49219|ENSG00000125779|80025|;
angiogenesis	GO:0001525	biological process	9606	4	217	0.0955508	0.23545	PLCD3; RORA; TBX4; TNFSF12;	PLCD3|IDBG-54655|ENSG00000161714|113026|; RORA|IDBG-14920|ENSG00000069667|6095|; TBX4|IDBG-62573|ENSG00000121075|9496|; TNFSF12|IDBG-408330|ENSG00000239697|8742|;
vesicle-mediated transport	GO:0016192	biological process	9606	4	218	0.0967666	0.237944	ADAMTS9; SFT2D1; SPIRE2; STX3;	ADAMTS9|IDBG-43120|ENSG00000163638|56999|; SFT2D1|IDBG-98930|ENSG00000198818|113402|; SPIRE2|IDBG-48448|ENSG00000204991|84501|; STX3|IDBG-48547|ENSG00000166900|6809|;
B cell differentiation	GO:0030183	biological process	9606	2	67	0.0997073	0.231988	KLF6; PIK3R1;	KLF6|IDBG-46758|ENSG00000067082|1316|; PIK3R1|IDBG-25037|ENSG00000145675|5295|;
positive regulation of neuron projection development	GO:0010976	biological process	9606	2	67	0.0997073	0.231988	EPHA3; STMN2;	EPHA3|IDBG-45928|ENSG00000044524|2042|; STMN2|IDBG-26222|ENSG00000104435|11075|;
single fertilization	GO:0007338	biological process	9606	2	67	0.0997073	0.231988	CATSPERD; OVGP1;	CATSPERD|IDBG-20604|ENSG00000174898|257062|; OVGP1|IDBG-101056|ENSG00000085465|5016|;
chromatin organization	GO:0006325	biological process	9606	3	140	0.101219	0.234572	KAT6B; MORF4L1; RBBP7;	KAT6B|IDBG-79073|ENSG00000156650|23522|; MORF4L1|IDBG-25183|ENSG00000185787|10933|; RBBP7|IDBG-47673|ENSG00000102054|5931|;
response to virus	GO:0009615	biological process	9606	3	140	0.101219	0.234572	DDX58; DHX36; IFIT3;	DDX58|IDBG-55854|ENSG00000107201|23586|; DHX36|IDBG-62011|ENSG00000174953|170506|; IFIT3|IDBG-81919|ENSG00000119917|3437|;
T cell costimulation	GO:0031295	biological process	9606	2	69	0.104736	0.241286	PIK3R1; PTPN6;	PIK3R1|IDBG-25037|ENSG00000145675|5295|; PTPN6|IDBG-15719|ENSG00000111679|5777|;
negative regulation of inflammatory response	GO:0050728	biological process	9606	2	69	0.104736	0.241286	MEFV; RORA;	MEFV|IDBG-11729|ENSG00000103313|4210|; RORA|IDBG-14920|ENSG00000069667|6095|;
cartilage development	GO:0051216	biological process	9606	2	70	0.107276	0.237758	GNAS; ZEB1;	GNAS|IDBG-82827|ENSG00000087460|2778|; ZEB1|IDBG-66941|ENSG00000148516|100996668,6935|;
exocytosis	GO:0006887	biological process	9606	2	73	0.114993	0.248266	NSF; STX3;	NSF|IDBG-55627|ENSG00000073969|101930324,4905|; STX3|IDBG-48547|ENSG00000166900|6809|;
regulation of translation	GO:0006417	biological process	9606	2	74	0.117597	0.253418	CNOT6L; PTCD3;	CNOT6L|IDBG-25831|ENSG00000138767|246175|; PTCD3|IDBG-59626|ENSG00000132300|55037|;
protein transport	GO:0015031	biological process	9606	7	517	0.119545	0.257144	ADAMTS9; DOPEY1; LSG1; NSF; SEC62; SFT2D1; SPIRE2;	ADAMTS9|IDBG-43120|ENSG00000163638|56999|; DOPEY1|IDBG-93723|ENSG00000083097|23033|; LSG1|IDBG-70417|ENSG00000041802|55341|; NSF|IDBG-55627|ENSG00000073969|101930324,4905|; SEC62|IDBG-64313|ENSG00000008952|7095|; SFT2D1|IDBG-98930|ENSG00000198818|113402|; SPIRE2|IDBG-48448|ENSG00000204991|84501|;
positive regulation of protein kinase B signaling	GO:0051897	biological process	9606	2	75	0.120215	0.249398	GCNT2; PIK3R5;	GCNT2|IDBG-60908|ENSG00000111846|2651|; PIK3R5|IDBG-29574|ENSG00000141506|23533|;
epithelial cell differentiation	GO:0030855	biological process	9606	2	76	0.122848	0.253062	EZR; RHCG;	EZR|IDBG-98477|ENSG00000092820|7430|; RHCG|IDBG-29352|ENSG00000140519|51458|;
microtubule cytoskeleton organization	GO:0000226	biological process	9606	2	76	0.122848	0.253062	CLASP1; DST;	CLASP1|IDBG-68461|ENSG00000074054|23332|; DST|IDBG-91303|ENSG00000151914|667|;
hematopoietic progenitor cell differentiation	GO:0002244	biological process	9606	2	77	0.125494	0.258059	PTPN6; TMEM143;	PTPN6|IDBG-15719|ENSG00000111679|5777|; TMEM143|IDBG-60309|ENSG00000161558|55260|;
multicellular organism growth	GO:0035264	biological process	9606	2	78	0.128155	0.256749	GNAS; RBBP6;	GNAS|IDBG-82827|ENSG00000087460|2778|; RBBP6|IDBG-21023|ENSG00000122257|5930|;
water-soluble vitamin metabolic process	GO:0006767	biological process	9606	2	78	0.128155	0.256749	PANK2; PDXK;	PANK2|IDBG-49219|ENSG00000125779|80025|; PDXK|IDBG-4833|ENSG00000160209|8566|;
phosphorylation	GO:0016310	biological process	9606	3	160	0.135631	0.264912	PANK2; PDXK; PMVK;	PANK2|IDBG-49219|ENSG00000125779|80025|; PDXK|IDBG-4833|ENSG00000160209|8566|; PMVK|IDBG-102982|ENSG00000163344|10654|;
response to hypoxia	GO:0001666	biological process	9606	3	160	0.135631	0.264912	LEP; PML; SLC11A2;	LEP|IDBG-39587|ENSG00000174697|3952|; PML|IDBG-21462|ENSG00000140464|5371|; SLC11A2|IDBG-32924|ENSG00000110911|4891|;
activation of cysteine-type endopeptidase activity involved in apoptotic process	GO:0006919	biological process	9606	2	81	0.136214	0.265163	PML; SLC11A2;	PML|IDBG-21462|ENSG00000140464|5371|; SLC11A2|IDBG-32924|ENSG00000110911|4891|;
phospholipid metabolic process	GO:0006644	biological process	9606	3	161	0.137448	0.26712	PIK3R1; PIK3R5; VAC14;	PIK3R1|IDBG-25037|ENSG00000145675|5295|; PIK3R5|IDBG-29574|ENSG00000141506|23533|; VAC14|IDBG-40481|ENSG00000103043|55697|;
multicellular organismal development	GO:0007275	biological process	9606	7	537	0.137683	0.26669	ADAMTS9; CATSPERD; GCNT2; RBBP7; SPATA24; TBX4; USP7;	ADAMTS9|IDBG-43120|ENSG00000163638|56999|; CATSPERD|IDBG-20604|ENSG00000174898|257062|; GCNT2|IDBG-60908|ENSG00000111846|2651|; RBBP7|IDBG-47673|ENSG00000102054|5931|; SPATA24|IDBG-47816|ENSG00000170469|202051|; TBX4|IDBG-62573|ENSG00000121075|9496|; USP7|IDBG-13958|ENSG00000187555|7874|;
cytokine-mediated signaling pathway	GO:0019221	biological process	9606	4	249	0.137887	0.266642	IFIT3; KLF6; PML; PTPN6;	IFIT3|IDBG-81919|ENSG00000119917|3437|; KLF6|IDBG-46758|ENSG00000067082|1316|; PML|IDBG-21462|ENSG00000140464|5371|; PTPN6|IDBG-15719|ENSG00000111679|5777|;
fibroblast growth factor receptor signaling pathway	GO:0008543	biological process	9606	3	163	0.141106	0.266254	CAMK4; PDE1C; PIK3R1;	CAMK4|IDBG-36661|ENSG00000152495|814|; PDE1C|IDBG-11559|ENSG00000154678|5137|; PIK3R1|IDBG-25037|ENSG00000145675|5295|;
viral process	GO:0016032	biological process	9606	7	545	0.145299	0.273724	DDX58; PIK3R1; PML; RNMT; SKP1; USP7; VAC14;	DDX58|IDBG-55854|ENSG00000107201|23586|; PIK3R1|IDBG-25037|ENSG00000145675|5295|; PML|IDBG-21462|ENSG00000140464|5371|; RNMT|IDBG-1256|ENSG00000101654|8731|; SKP1|IDBG-44621|ENSG00000113558|6500|; USP7|IDBG-13958|ENSG00000187555|7874|; VAC14|IDBG-40481|ENSG00000103043|55697|;
regulation of insulin secretion	GO:0050796	biological process	9606	2	85	0.147129	0.276725	GNAS; LEP;	GNAS|IDBG-82827|ENSG00000087460|2778|; LEP|IDBG-39587|ENSG00000174697|3952|;
vitamin metabolic process	GO:0006766	biological process	9606	2	86	0.149885	0.277003	PANK2; PDXK;	PANK2|IDBG-49219|ENSG00000125779|80025|; PDXK|IDBG-4833|ENSG00000160209|8566|;
protein stabilization	GO:0050821	biological process	9606	2	87	0.152652	0.281226	PML; TBRG1;	PML|IDBG-21462|ENSG00000140464|5371|; TBRG1|IDBG-75180|ENSG00000154144|84897|;
neurotrophin TRK receptor signaling pathway	GO:0048011	biological process	9606	4	277	0.180041	0.307888	CAMK4; PCSK6; PDE1C; PIK3R1;	CAMK4|IDBG-36661|ENSG00000152495|814|; PCSK6|IDBG-32449|ENSG00000140479|100507472,5046|; PDE1C|IDBG-11559|ENSG00000154678|5137|; PIK3R1|IDBG-25037|ENSG00000145675|5295|;
cellular response to hypoxia	GO:0071456	biological process	9606	2	97	0.180821	0.30832	RORA; SLC11A2;	RORA|IDBG-14920|ENSG00000069667|6095|; SLC11A2|IDBG-32924|ENSG00000110911|4891|;
axonogenesis	GO:0007409	biological process	9606	2	99	0.186548	0.314413	DST; TNN;	DST|IDBG-91303|ENSG00000151914|667|; TNN|IDBG-104971|ENSG00000120332|63923|;
muscle contraction	GO:0006936	biological process	9606	2	99	0.186548	0.314413	KCNJ12; TPM2;	KCNJ12|IDBG-35680|ENSG00000184185|100996843,3768|; TPM2|IDBG-63176|ENSG00000198467|7169|;
energy reserve metabolic process	GO:0006112	biological process	9606	2	100	0.189421	0.314267	GNAS; LEP;	GNAS|IDBG-82827|ENSG00000087460|2778|; LEP|IDBG-39587|ENSG00000174697|3952|;
epidermal growth factor receptor signaling pathway	GO:0007173	biological process	9606	3	194	0.201464	0.326366	CAMK4; PDE1C; PIK3R1;	CAMK4|IDBG-36661|ENSG00000152495|814|; PDE1C|IDBG-11559|ENSG00000154678|5137|; PIK3R1|IDBG-25037|ENSG00000145675|5295|;
lung development	GO:0030324	biological process	9606	2	106	0.206778	0.334049	TBX4; TSHZ3;	TBX4|IDBG-62573|ENSG00000121075|9496|; TSHZ3|IDBG-42067|ENSG00000121297|57616|;
lipid metabolic process	GO:0006629	biological process	9606	3	198	0.209665	0.334091	LEP; MGST3; PLCD3;	LEP|IDBG-39587|ENSG00000174697|3952|; MGST3|IDBG-104471|ENSG00000143198|4259|; PLCD3|IDBG-54655|ENSG00000161714|113026|;
potassium ion transport	GO:0006813	biological process	9606	2	108	0.212603	0.338311	KCNJ12; NSF;	KCNJ12|IDBG-35680|ENSG00000184185|100996843,3768|; NSF|IDBG-55627|ENSG00000073969|101930324,4905|;
leukocyte migration	GO:0050900	biological process	9606	2	116	0.236041	0.357119	PIK3R1; PTPN6;	PIK3R1|IDBG-25037|ENSG00000145675|5295|; PTPN6|IDBG-15719|ENSG00000111679|5777|;
cell death	GO:0008219	biological process	9606	3	214	0.243143	0.365027	FUS; PANK2; PIK3R5;	FUS|IDBG-27917|ENSG00000089280|2521|; PANK2|IDBG-49219|ENSG00000125779|80025|; PIK3R5|IDBG-29574|ENSG00000141506|23533|;
protein polyubiquitination	GO:0000209	biological process	9606	2	121	0.250766	0.367958	DTL; MARCH1;	DTL|IDBG-106535|ENSG00000143476|51514|; MARCH1|IDBG-43339|ENSG00000145416|55016|;
proteolysis	GO:0006508	biological process	9606	6	544	0.266632	0.382587	ADAMTS9; KLK1; PCSK6; PMPCB; PROZ; STAMBPL1;	ADAMTS9|IDBG-43120|ENSG00000163638|56999|; KLK1|IDBG-64886|ENSG00000167748|3816|; PCSK6|IDBG-32449|ENSG00000140479|100507472,5046|; PMPCB|IDBG-34271|ENSG00000105819|9512|; PROZ|IDBG-52386|ENSG00000126231|8858|; STAMBPL1|IDBG-81574|ENSG00000138134|57559|;
transforming growth factor beta receptor signaling pathway	GO:0007179	biological process	9606	2	128	0.271421	0.386609	GCNT2; PML;	GCNT2|IDBG-60908|ENSG00000111846|2651|; PML|IDBG-21462|ENSG00000140464|5371|;
gene expression	GO:0010467	biological process	9606	7	680	0.298668	0.406106	CNOT6L; EIF3C; FUS; GTF3A; MED26; RNMT; RORA;	CNOT6L|IDBG-25831|ENSG00000138767|246175|; EIF3C|IDBG-23122|ENSG00000184110|8663|; FUS|IDBG-27917|ENSG00000089280|2521|; GTF3A|IDBG-19126|ENSG00000122034|2971|; MED26|IDBG-35738|ENSG00000105085|9441|; RNMT|IDBG-1256|ENSG00000101654|8731|; RORA|IDBG-14920|ENSG00000069667|6095|;
positive regulation of cell migration	GO:0030335	biological process	9606	2	138	0.300888	0.408648	GCNT2; PIK3R1;	GCNT2|IDBG-60908|ENSG00000111846|2651|; PIK3R1|IDBG-25037|ENSG00000145675|5295|;
cell differentiation	GO:0030154	biological process	9606	5	461	0.306208	0.41204	PTPN6; PTPRU; SPATA24; TBCB; TNFSF12;	PTPN6|IDBG-15719|ENSG00000111679|5777|; PTPRU|IDBG-95340|ENSG00000060656|10076|; SPATA24|IDBG-47816|ENSG00000170469|202051|; TBCB|IDBG-46531|ENSG00000105254|1155|; TNFSF12|IDBG-408330|ENSG00000239697|8742|;
G2/M transition of mitotic cell cycle	GO:0000086	biological process	9606	2	143	0.315557	0.419307	CLASP1; SKP1;	CLASP1|IDBG-68461|ENSG00000074054|23332|; SKP1|IDBG-44621|ENSG00000113558|6500|;
nucleosome assembly	GO:0006334	biological process	9606	2	143	0.315557	0.419307	KAT6B; RBBP7;	KAT6B|IDBG-79073|ENSG00000156650|23522|; RBBP7|IDBG-47673|ENSG00000102054|5931|;
peptidyl-tyrosine phosphorylation	GO:0018108	biological process	9606	2	144	0.318483	0.422714	EPHA3; PTPN6;	EPHA3|IDBG-45928|ENSG00000044524|2042|; PTPN6|IDBG-15719|ENSG00000111679|5777|;
defense response to virus	GO:0051607	biological process	9606	2	146	0.324327	0.429008	IFIT3; PML;	IFIT3|IDBG-81919|ENSG00000119917|3437|; PML|IDBG-21462|ENSG00000140464|5371|;
RNA splicing	GO:0008380	biological process	9606	3	252	0.325208	0.428717	FUS; RBM25; RBM39;	FUS|IDBG-27917|ENSG00000089280|2521|; RBM25|IDBG-11203|ENSG00000119707|58517|; RBM39|IDBG-71434|ENSG00000131051|9584|;
xenobiotic metabolic process	GO:0006805	biological process	9606	2	148	0.330159	0.433774	MGST3; RORA;	MGST3|IDBG-104471|ENSG00000143198|4259|; RORA|IDBG-14920|ENSG00000069667|6095|;
blood coagulation	GO:0007596	biological process	9606	5	483	0.340697	0.441169	GNAS; PIK3R1; PIK3R5; PROZ; PTPN6;	GNAS|IDBG-82827|ENSG00000087460|2778|; PIK3R1|IDBG-25037|ENSG00000145675|5295|; PIK3R5|IDBG-29574|ENSG00000141506|23533|; PROZ|IDBG-52386|ENSG00000126231|8858|; PTPN6|IDBG-15719|ENSG00000111679|5777|;
small molecule metabolic process	GO:0044281	biological process	9606	13	1421	0.342991	0.443647	DCN; GLRX; GNAS; KYNU; MGST3; PANK2; PDXK; PFKFB4; PIK3R1; PIK3R5; PLCD3; PMVK; VAC14;	DCN|IDBG-50872|ENSG00000011465|1634|; GLRX|IDBG-34038|ENSG00000173221|2745|; GNAS|IDBG-82827|ENSG00000087460|2778|; KYNU|IDBG-71532|ENSG00000115919|8942|; MGST3|IDBG-104471|ENSG00000143198|4259|; PANK2|IDBG-49219|ENSG00000125779|80025|; PDXK|IDBG-4833|ENSG00000160209|8566|; PFKFB4|IDBG-32970|ENSG00000114268|5210|; PIK3R1|IDBG-25037|ENSG00000145675|5295|; PIK3R5|IDBG-29574|ENSG00000141506|23533|; …
cell migration	GO:0016477	biological process	9606	2	155	0.350454	0.450308	EPHA3; TNN;	EPHA3|IDBG-45928|ENSG00000044524|2042|; TNN|IDBG-104971|ENSG00000120332|63923|;
positive regulation of transcription from RNA polymerase II promoter	GO:0045944	biological process	9606	8	849	0.364786	0.462617	CAMTA2; DDX58; DHX36; HSF2; PIK3R1; RBM14; RORA; ZEB1;	CAMTA2|IDBG-20579|ENSG00000108509|23125|; DDX58|IDBG-55854|ENSG00000107201|23586|; DHX36|IDBG-62011|ENSG00000174953|170506|; HSF2|IDBG-95987|ENSG00000025156|3298|; PIK3R1|IDBG-25037|ENSG00000145675|5295|; RBM14|IDBG-409430|ENSG00000239306|10432|; RORA|IDBG-14920|ENSG00000069667|6095|; ZEB1|IDBG-66941|ENSG00000148516|100996668,6935|;
regulation of transcription from RNA polymerase II promoter	GO:0006357	biological process	9606	4	385	0.36778	0.464899	CAMTA2; HSF2; MED26; ZEB1;	CAMTA2|IDBG-20579|ENSG00000108509|23125|; HSF2|IDBG-95987|ENSG00000025156|3298|; MED26|IDBG-35738|ENSG00000105085|9441|; ZEB1|IDBG-66941|ENSG00000148516|100996668,6935|;
biological_process	GO:0008150	biological process	9606	6	635	0.394251	0.487802	AHCYL1; TMEM129; TMEM143; TMEM56; ZBTB11; ZMYM2;	AHCYL1|IDBG-100935|ENSG00000168710|10768|; TMEM129|IDBG-6851|ENSG00000168936|92305|; TMEM143|IDBG-60309|ENSG00000161558|55260|; TMEM56|IDBG-100394|ENSG00000152078|148534|; ZBTB11|IDBG-47994|ENSG00000066422|27107|; ZMYM2|IDBG-12869|ENSG00000121741|7750|;
ATP catabolic process	GO:0006200	biological process	9606	3	287	0.401033	0.490478	DHX36; NSF; YTHDC2;	DHX36|IDBG-62011|ENSG00000174953|170506|; NSF|IDBG-55627|ENSG00000073969|101930324,4905|; YTHDC2|IDBG-37505|ENSG00000047188|64848|;
signal transduction	GO:0007165	biological process	9606	12	1368	0.40757	0.495361	CAMK4; GNAS; HPCAL1; LEP; MGST3; NMU; PDE1C; PIK3R1; PLCD3; PPP1R16B; TNFSF12; VAC14;	CAMK4|IDBG-36661|ENSG00000152495|814|; GNAS|IDBG-82827|ENSG00000087460|2778|; HPCAL1|IDBG-28496|ENSG00000115756|3241|; LEP|IDBG-39587|ENSG00000174697|3952|; MGST3|IDBG-104471|ENSG00000143198|4259|; NMU|IDBG-19638|ENSG00000109255|10874|; PDE1C|IDBG-11559|ENSG00000154678|5137|; PIK3R1|IDBG-25037|ENSG00000145675|5295|; PLCD3|IDBG-54655|ENSG00000161714|113026|; PPP1R16B|IDBG-74938|ENSG00000101445|260…
cellular protein metabolic process	GO:0044267	biological process	9606	5	538	0.427591	0.515936	EIF3C; PMPCB; PROZ; TBCB; TOMM20;	EIF3C|IDBG-23122|ENSG00000184110|8663|; PMPCB|IDBG-34271|ENSG00000105819|9512|; PROZ|IDBG-52386|ENSG00000126231|8858|; TBCB|IDBG-46531|ENSG00000105254|1155|; TOMM20|IDBG-107524|ENSG00000173726|9804|;
intracellular signal transduction	GO:0035556	biological process	9606	4	420	0.4307	0.518082	PLCD3; PTPN6; TNS1; WNK2;	PLCD3|IDBG-54655|ENSG00000161714|113026|; PTPN6|IDBG-15719|ENSG00000111679|5777|; TNS1|IDBG-80769|ENSG00000079308|7145|; WNK2|IDBG-76524|ENSG00000165238|65268|;
transcription initiation from RNA polymerase II promoter	GO:0006367	biological process	9606	2	184	0.431916	0.51901	MED26; RORA;	MED26|IDBG-35738|ENSG00000105085|9441|; RORA|IDBG-14920|ENSG00000069667|6095|;
extracellular matrix organization	GO:0030198	biological process	9606	3	312	0.453804	0.539759	DCN; DST; RECK;	DCN|IDBG-50872|ENSG00000011465|1634|; DST|IDBG-91303|ENSG00000151914|667|; RECK|IDBG-64722|ENSG00000122707|8434|;
positive regulation of gene expression	GO:0010628	biological process	9606	2	193	0.456115	0.541405	EZR; PPM1F;	EZR|IDBG-98477|ENSG00000092820|7430|; PPM1F|IDBG-2163|ENSG00000100034|9647|;
positive regulation of transcription, DNA-templated	GO:0045893	biological process	9606	5	563	0.466554	0.551554	CAMK4; DNAJC2; KAT6B; KLF6; RORA;	CAMK4|IDBG-36661|ENSG00000152495|814|; DNAJC2|IDBG-34312|ENSG00000105821|27000|; KAT6B|IDBG-79073|ENSG00000156650|23522|; KLF6|IDBG-46758|ENSG00000067082|1316|; RORA|IDBG-14920|ENSG00000069667|6095|;
metabolic process	GO:0008152	biological process	9606	10	1195	0.482822	0.564501	DCXR; DDX58; DHX36; KYNU; PDE1C; PLCD3; PMPCB; RNMT; WNK2; YTHDC2;	DCXR|IDBG-73075|ENSG00000169738|51181|; DDX58|IDBG-55854|ENSG00000107201|23586|; DHX36|IDBG-62011|ENSG00000174953|170506|; KYNU|IDBG-71532|ENSG00000115919|8942|; PDE1C|IDBG-11559|ENSG00000154678|5137|; PLCD3|IDBG-54655|ENSG00000161714|113026|; PMPCB|IDBG-34271|ENSG00000105819|9512|; RNMT|IDBG-1256|ENSG00000101654|8731|; WNK2|IDBG-76524|ENSG00000165238|65268|; YTHDC2|IDBG-37505|ENSG00000047188|648…
platelet activation	GO:0030168	biological process	9606	2	205	0.487445	0.5682	PIK3R1; PIK3R5;	PIK3R1|IDBG-25037|ENSG00000145675|5295|; PIK3R5|IDBG-29574|ENSG00000141506|23533|;
mRNA processing	GO:0006397	biological process	9606	2	206	0.490006	0.570047	RBM25; RBM39;	RBM25|IDBG-11203|ENSG00000119707|58517|; RBM39|IDBG-71434|ENSG00000131051|9584|;
intracellular protein transport	GO:0006886	biological process	9606	3	333	0.496627	0.574317	STX3; TOMM20; UCMA;	STX3|IDBG-48547|ENSG00000166900|6809|; TOMM20|IDBG-107524|ENSG00000173726|9804|; UCMA|IDBG-54868|ENSG00000165623|221044|;
positive regulation of cell proliferation	GO:0008284	biological process	9606	4	462	0.503857	0.58038	CNOT6L; GCNT2; LEP; PTPN6;	CNOT6L|IDBG-25831|ENSG00000138767|246175|; GCNT2|IDBG-60908|ENSG00000111846|2651|; LEP|IDBG-39587|ENSG00000174697|3952|; PTPN6|IDBG-15719|ENSG00000111679|5777|;
transcription from RNA polymerase II promoter	GO:0006366	biological process	9606	4	478	0.53067	0.604116	AFF4; HSF2; RBM14; RNMT;	AFF4|IDBG-43817|ENSG00000072364|27125|; HSF2|IDBG-95987|ENSG00000025156|3298|; RBM14|IDBG-409430|ENSG00000239306|10432|; RNMT|IDBG-1256|ENSG00000101654|8731|;
immune response	GO:0006955	biological process	9606	3	367	0.562213	0.631409	MARCH1; TNFSF12; ZEB1;	MARCH1|IDBG-43339|ENSG00000145416|55016|; TNFSF12|IDBG-408330|ENSG00000239697|8742|; ZEB1|IDBG-66941|ENSG00000148516|100996668,6935|;
apoptotic process	GO:0006915	biological process	9606	5	639	0.578957	0.646484	BCLAF1; PDCD4; PML; PTPN6; TNFSF12;	BCLAF1|IDBG-96919|ENSG00000029363|9774|; PDCD4|IDBG-89535|ENSG00000150593|100616113,27250|; PML|IDBG-21462|ENSG00000140464|5371|; PTPN6|IDBG-15719|ENSG00000111679|5777|; TNFSF12|IDBG-408330|ENSG00000239697|8742|;
in utero embryonic development	GO:0001701	biological process	9606	2	247	0.587828	0.651407	RBBP6; TSHZ3;	RBBP6|IDBG-21023|ENSG00000122257|5930|; TSHZ3|IDBG-42067|ENSG00000121297|57616|;
spermatogenesis	GO:0007283	biological process	9606	3	387	0.59832	0.660528	CATSPERD; HSF2; SPATA24;	CATSPERD|IDBG-20604|ENSG00000174898|257062|; HSF2|IDBG-95987|ENSG00000025156|3298|; SPATA24|IDBG-47816|ENSG00000170469|202051|;
synaptic transmission	GO:0007268	biological process	9606	3	397	0.615637	0.672651	CAMK4; KCNJ12; NSF;	CAMK4|IDBG-36661|ENSG00000152495|814|; KCNJ12|IDBG-35680|ENSG00000184185|100996843,3768|; NSF|IDBG-55627|ENSG00000073969|101930324,4905|;
carbohydrate metabolic process	GO:0005975	biological process	9606	3	402	0.624107	0.679997	DCN; OVGP1; PFKFB4;	DCN|IDBG-50872|ENSG00000011465|1634|; OVGP1|IDBG-101056|ENSG00000085465|5016|; PFKFB4|IDBG-32970|ENSG00000114268|5210|;
GTP catabolic process	GO:0006184	biological process	9606	2	272	0.640368	0.692546	GNAS; LSG1;	GNAS|IDBG-82827|ENSG00000087460|2778|; LSG1|IDBG-70417|ENSG00000041802|55341|;
translation	GO:0006412	biological process	9606	2	274	0.644337	0.69555	EIF3C; SECISBP2;	EIF3C|IDBG-23122|ENSG00000184110|8663|; SECISBP2|IDBG-75336|ENSG00000187742|79048|;
mitotic cell cycle	GO:0000278	biological process	9606	3	416	0.647146	0.697938	CDCA8; CLASP1; SKP1;	CDCA8|IDBG-96468|ENSG00000134690|55143|; CLASP1|IDBG-68461|ENSG00000074054|23332|; SKP1|IDBG-44621|ENSG00000113558|6500|;
DNA repair	GO:0006281	biological process	9606	2	311	0.711678	0.752934	RBM14; SMUG1;	RBM14|IDBG-409430|ENSG00000239306|10432|; SMUG1|IDBG-37516|ENSG00000123415|23583|;
cell adhesion	GO:0007155	biological process	9606	3	462	0.715745	0.754504	DST; EPHA3; PTPRU;	DST|IDBG-91303|ENSG00000151914|667|; EPHA3|IDBG-45928|ENSG00000044524|2042|; PTPRU|IDBG-95340|ENSG00000060656|10076|;
inflammatory response	GO:0006954	biological process	9606	2	315	0.718285	0.756498	CAMK4; MEFV;	CAMK4|IDBG-36661|ENSG00000152495|814|; MEFV|IDBG-11729|ENSG00000103313|4210|;
transmembrane transport	GO:0055085	biological process	9606	5	766	0.734853	0.771167	DST; GNAS; RHCG; SEC62; SLC11A2;	DST|IDBG-91303|ENSG00000151914|667|; GNAS|IDBG-82827|ENSG00000087460|2778|; RHCG|IDBG-29352|ENSG00000140519|51458|; SEC62|IDBG-64313|ENSG00000008952|7095|; SLC11A2|IDBG-32924|ENSG00000110911|4891|;
protein phosphorylation	GO:0006468	biological process	9606	4	630	0.743271	0.775125	CAMK4; EPHA3; PIK3R1; WNK2;	CAMK4|IDBG-36661|ENSG00000152495|814|; EPHA3|IDBG-45928|ENSG00000044524|2042|; PIK3R1|IDBG-25037|ENSG00000145675|5295|; WNK2|IDBG-76524|ENSG00000165238|65268|;
axon guidance	GO:0007411	biological process	9606	2	336	0.750924	0.779626	CLASP1; EZR;	CLASP1|IDBG-68461|ENSG00000074054|23332|; EZR|IDBG-98477|ENSG00000092820|7430|;
protein ubiquitination	GO:0016567	biological process	9606	2	342	0.759637	0.787272	RBBP6; SKP1;	RBBP6|IDBG-21023|ENSG00000122257|5930|; SKP1|IDBG-44621|ENSG00000113558|6500|;
negative regulation of apoptotic process	GO:0043066	biological process	9606	3	501	0.765511	0.791954	IFIT3; LEP; PIK3R1;	IFIT3|IDBG-81919|ENSG00000119917|3437|; LEP|IDBG-39587|ENSG00000174697|3952|; PIK3R1|IDBG-25037|ENSG00000145675|5295|;
G-protein coupled receptor signaling pathway	GO:0007186	biological process	9606	6	979	0.797823	0.817419	GNAS; GPR174; GPR26; NMU; PIK3R5; PTPN6;	GNAS|IDBG-82827|ENSG00000087460|2778|; GPR174|IDBG-78098|ENSG00000147138|84636|; GPR26|IDBG-92567|ENSG00000154478|2849|; NMU|IDBG-19638|ENSG00000109255|10874|; PIK3R5|IDBG-29574|ENSG00000141506|23533|; PTPN6|IDBG-15719|ENSG00000111679|5777|;
oxidation-reduction process	GO:0055114	biological process	9606	4	693	0.806828	0.824475	AHCYL1; DCXR; GLRX; MGST3;	AHCYL1|IDBG-100935|ENSG00000168710|10768|; DCXR|IDBG-73075|ENSG00000169738|51181|; GLRX|IDBG-34038|ENSG00000173221|2745|; MGST3|IDBG-104471|ENSG00000143198|4259|;
transport	GO:0006810	biological process	9606	3	542	0.810014	0.827007	DST; SEC62; SLC11A2;	DST|IDBG-91303|ENSG00000151914|667|; SEC62|IDBG-64313|ENSG00000008952|7095|; SLC11A2|IDBG-32924|ENSG00000110911|4891|;
negative regulation of transcription from RNA polymerase II promoter	GO:0000122	biological process	9606	3	619	0.874556	0.885166	LEP; RBBP7; ZEB1;	LEP|IDBG-39587|ENSG00000174697|3952|; RBBP7|IDBG-47673|ENSG00000102054|5931|; ZEB1|IDBG-66941|ENSG00000148516|100996668,6935|;

## Sheet: Molecular pathway enrichment
Pathway Name (entires with >1 mapped genes are shown)	Pathway Id	Source Name	Organism	Pathway uploadedgene count	Genes in InnateDB for this entity	Pathway p-value	Pathway p-value (corrected)	Gene Symbols	Genes (Symbol|IDBG-ID|Ensembl|Entrez|Fold Change|P-Value)
PI Metabolism	18780	REACTOME	9606	3	51	0.00805377	1	PIK3R1; PIK3R5; VAC14;	PIK3R1|IDBG-25037|ENSG00000145675|5295|; PIK3R5|IDBG-29574|ENSG00000141506|23533|; VAC14|IDBG-40481|ENSG00000103043|55697|;
Signaling by FGFR1 fusion mutants	13700	REACTOME	9606	2	17	0.00814116	0.616015	PIK3R1; ZMYM2;	PIK3R1|IDBG-25037|ENSG00000145675|5295|; ZMYM2|IDBG-12869|ENSG00000121741|7750|;
TGF_beta_Receptor	15911	NETPATH	9606	5	220	0.032689272379810674	0.22486257061263706	PIK3R1; PML; SKP1; STAMBPL1; ZEB1;	PIK3R1|IDBG-25037|ENSG00000145675|5295|; PML|IDBG-21462|ENSG00000140464|5371|; SKP1|IDBG-44621|ENSG00000113558|6500|; STAMBPL1|IDBG-81574|ENSG00000138134|57559|; ZEB1|IDBG-66941|ENSG00000148516|100996668,6935|;
Erk and pi-3 kinase are necessary for collagen binding in corneal epithelia	4125	PID BIOCARTA	9606	2	31	0.025877959434824988	0.2259344919886643	PIK3R1; TNS1;	PIK3R1|IDBG-25037|ENSG00000145675|5295|; TNS1|IDBG-80769|ENSG00000079308|7145|;
Acute myeloid leukemia	424	KEGG	9606	3	58	0.0114613	0.433621	PIK3R1; PIK3R5; PML;	PIK3R1|IDBG-25037|ENSG00000145675|5295|; PIK3R5|IDBG-29574|ENSG00000141506|23533|; PML|IDBG-21462|ENSG00000140464|5371|;
Calcium signaling pathway	594	KEGG	9606	5	183	0.0162133	0.334584	CAMK4; GNAS; PDE1C; PLCD3; STIM2;	CAMK4|IDBG-36661|ENSG00000152495|814|; GNAS|IDBG-82827|ENSG00000087460|2778|; PDE1C|IDBG-11559|ENSG00000154678|5137|; PLCD3|IDBG-54655|ENSG00000161714|113026|; STIM2|IDBG-12896|ENSG00000109689|57620|;
Il-2 receptor beta chain in t cell activation	4011	PID BIOCARTA	9606	2	49	0.05964433641208449	0.22947905704310473	PIK3R1; PTPN6;	PIK3R1|IDBG-25037|ENSG00000145675|5295|; PTPN6|IDBG-15719|ENSG00000111679|5777|;
Signaling by FGFR1 mutants	17632	REACTOME	9606	2	25	0.0172242	0.325824	PIK3R1; ZMYM2;	PIK3R1|IDBG-25037|ENSG00000145675|5295|; ZMYM2|IDBG-12869|ENSG00000121741|7750|;
Fertilization	18255	REACTOME	9606	2	26	0.0185627	0.280915	CATSPERD; OVGP1;	CATSPERD|IDBG-20604|ENSG00000174898|257062|; OVGP1|IDBG-101056|ENSG00000085465|5016|;
Reproduction	18547	REACTOME	9606	2	26	0.0185627	0.280915	CATSPERD; OVGP1;	CATSPERD|IDBG-20604|ENSG00000174898|257062|; OVGP1|IDBG-101056|ENSG00000085465|5016|;
Interleukin receptor SHC signaling	13081	REACTOME	9606	2	27	0.0199437	0.266307	PIK3R1; PTPN6;	PIK3R1|IDBG-25037|ENSG00000145675|5295|; PTPN6|IDBG-15719|ENSG00000111679|5777|;
Cytokine Signaling in Immune system	17418	REACTOME	9606	6	267	0.0208908	0.263457	DDX58; IFIT3; PIK3R1; PML; PTPN6; SKP1;	DDX58|IDBG-55854|ENSG00000107201|23586|; IFIT3|IDBG-81919|ENSG00000119917|3437|; PIK3R1|IDBG-25037|ENSG00000145675|5295|; PML|IDBG-21462|ENSG00000140464|5371|; PTPN6|IDBG-15719|ENSG00000111679|5777|; SKP1|IDBG-44621|ENSG00000113558|6500|;
CaM pathway	12995	REACTOME	9606	2	28	0.0213665	0.242509	CAMK4; PDE1C;	CAMK4|IDBG-36661|ENSG00000152495|814|; PDE1C|IDBG-11559|ENSG00000154678|5137|;
Calmodulin induced events	12994	REACTOME	9606	2	28	0.0213665	0.242509	CAMK4; PDE1C;	CAMK4|IDBG-36661|ENSG00000152495|814|; PDE1C|IDBG-11559|ENSG00000154678|5137|;
B cell receptor signaling pathway	532	KEGG	9606	3	74	0.0219661	0.237443	PIK3R1; PIK3R5; PTPN6;	PIK3R1|IDBG-25037|ENSG00000145675|5295|; PIK3R5|IDBG-29574|ENSG00000141506|23533|; PTPN6|IDBG-15719|ENSG00000111679|5777|;
EPO signaling pathway	15297	PID NCI	9606	2	30	0.024334334301373276	0.2301622452671556	PIK3R1; PTPN6;	PIK3R1|IDBG-25037|ENSG00000145675|5295|; PTPN6|IDBG-15719|ENSG00000111679|5777|;
Ca-dependent events	19683	REACTOME	9606	2	30	0.0243343	0.230162	CAMK4; PDE1C;	CAMK4|IDBG-36661|ENSG00000152495|814|; PDE1C|IDBG-11559|ENSG00000154678|5137|;
TSH	15927	NETPATH	9606	3	82	0.028668268941346196	0.23241775177448523	GNAS; LEP; PIK3R1;	GNAS|IDBG-82827|ENSG00000087460|2778|; LEP|IDBG-39587|ENSG00000174697|3952|; PIK3R1|IDBG-25037|ENSG00000145675|5295|;
Circadian rhythm	526	KEGG	9606	2	30	0.0243343	0.230162	RORA; SKP1;	RORA|IDBG-14920|ENSG00000069667|6095|; SKP1|IDBG-44621|ENSG00000113558|6500|;
Signaling events mediated by Stem cell factor receptor (c-Kit)	15404	PID NCI	9606	2	52	0.06622639796325933	0.23489675527593543	PIK3R1; PTPN6;	PIK3R1|IDBG-25037|ENSG00000145675|5295|; PTPN6|IDBG-15719|ENSG00000111679|5777|;
TRAF6 mediated IRF7 activation	13012	REACTOME	9606	2	31	0.025878	0.225934	DDX58; DHX36;	DDX58|IDBG-55854|ENSG00000107201|23586|; DHX36|IDBG-62011|ENSG00000174953|170506|;
Phosphatidylinositol signaling system	528	KEGG	9606	3	82	0.0286683	0.232418	PIK3R1; PIK3R5; PLCD3;	PIK3R1|IDBG-25037|ENSG00000145675|5295|; PIK3R5|IDBG-29574|ENSG00000141506|23533|; PLCD3|IDBG-54655|ENSG00000161714|113026|;
DAG and IP3 signaling	12996	REACTOME	9606	2	33	0.029081	0.220046	CAMK4; PDE1C;	CAMK4|IDBG-36661|ENSG00000152495|814|; PDE1C|IDBG-11559|ENSG00000154678|5137|;
Synthesis of PIPs at the plasma membrane	13472	REACTOME	9606	2	33	0.029081	0.220046	PIK3R1; PIK3R5;	PIK3R1|IDBG-25037|ENSG00000145675|5295|; PIK3R5|IDBG-29574|ENSG00000141506|23533|;
Inositol phosphate metabolism	16257	INOH	9606	2	41	0.04333480616461758	0.23992685364312658	PIK3R5; PLCD3;	PIK3R5|IDBG-29574|ENSG00000141506|23533|; PLCD3|IDBG-54655|ENSG00000161714|113026|;
IL3	15919	NETPATH	9606	2	84	0.1480610433009642	0.24007040592370624	PIK3R1; PTPN6;	PIK3R1|IDBG-25037|ENSG00000145675|5295|; PTPN6|IDBG-15719|ENSG00000111679|5777|;
RANKL	15925	NETPATH	9606	2	84	0.1480610433009642	0.24007040592370624	PIK3R1; PTPN6;	PIK3R1|IDBG-25037|ENSG00000145675|5295|; PTPN6|IDBG-15719|ENSG00000111679|5777|;
EGFR interacts with phospholipase C-gamma	13211	REACTOME	9606	2	35	0.0324336	0.230076	CAMK4; PDE1C;	CAMK4|IDBG-36661|ENSG00000152495|814|; PDE1C|IDBG-11559|ENSG00000154678|5137|;
PLC-gamma1 signalling	13179	REACTOME	9606	2	35	0.0324336	0.230076	CAMK4; PDE1C;	CAMK4|IDBG-36661|ENSG00000152495|814|; PDE1C|IDBG-11559|ENSG00000154678|5137|;
PLCG1 events in ERBB2 signaling	13288	REACTOME	9606	2	36	0.0341643	0.228097	CAMK4; PDE1C;	CAMK4|IDBG-36661|ENSG00000152495|814|; PDE1C|IDBG-11559|ENSG00000154678|5137|;
Interferon Signaling	18059	REACTOME	9606	4	158	0.0390484	0.246222	DDX58; IFIT3; PML; PTPN6;	DDX58|IDBG-55854|ENSG00000107201|23586|; IFIT3|IDBG-81919|ENSG00000119917|3437|; PML|IDBG-21462|ENSG00000140464|5371|; PTPN6|IDBG-15719|ENSG00000111679|5777|;
Jak-STAT signaling pathway	568	KEGG	9606	4	158	0.0390484	0.246222	LEP; PIK3R1; PIK3R5; PTPN6;	LEP|IDBG-39587|ENSG00000174697|3952|; PIK3R1|IDBG-25037|ENSG00000145675|5295|; PIK3R5|IDBG-29574|ENSG00000141506|23533|; PTPN6|IDBG-15719|ENSG00000111679|5777|;
Aldosterone-regulated sodium reabsorption	8110	KEGG	9606	2	40	0.041434	0.241167	PIK3R1; PIK3R5;	PIK3R1|IDBG-25037|ENSG00000145675|5295|; PIK3R5|IDBG-29574|ENSG00000141506|23533|;
Signaling by FGFR mutants	13704	REACTOME	9606	2	40	0.041434	0.241167	PIK3R1; ZMYM2;	PIK3R1|IDBG-25037|ENSG00000145675|5295|; ZMYM2|IDBG-12869|ENSG00000121741|7750|;
Signaling by FGFR in disease	16656	REACTOME	9606	4	162	0.0421773	0.239356	CAMK4; PDE1C; PIK3R1; ZMYM2;	CAMK4|IDBG-36661|ENSG00000152495|814|; PDE1C|IDBG-11559|ENSG00000154678|5137|; PIK3R1|IDBG-25037|ENSG00000145675|5295|; ZMYM2|IDBG-12869|ENSG00000121741|7750|;
Chagas disease (American trypanosomiasis)	10366	KEGG	9606	3	103	0.050809	0.268225	GNAS; PIK3R1; PIK3R5;	GNAS|IDBG-82827|ENSG00000087460|2778|; PIK3R1|IDBG-25037|ENSG00000145675|5295|; PIK3R5|IDBG-29574|ENSG00000141506|23533|;
Interleukin-2 signaling	13083	REACTOME	9606	2	45	0.0512526	0.242382	PIK3R1; PTPN6;	PIK3R1|IDBG-25037|ENSG00000145675|5295|; PTPN6|IDBG-15719|ENSG00000111679|5777|;
PLC beta mediated events	13257	REACTOME	9606	2	45	0.0512526	0.242382	CAMK4; PDE1C;	CAMK4|IDBG-36661|ENSG00000152495|814|; PDE1C|IDBG-11559|ENSG00000154678|5137|;
Vasopressin-regulated water reabsorption	8109	KEGG	9606	2	45	0.0512526	0.242382	GNAS; NSF;	GNAS|IDBG-82827|ENSG00000087460|2778|; NSF|IDBG-55627|ENSG00000073969|101930324,4905|;
Carbohydrate digestion and absorption	10389	KEGG	9606	2	46	0.0533076	0.242017	PIK3R1; PIK3R5;	PIK3R1|IDBG-25037|ENSG00000145675|5295|; PIK3R5|IDBG-29574|ENSG00000141506|23533|;
G-protein mediated events	18202	REACTOME	9606	2	46	0.0533076	0.242017	CAMK4; PDE1C;	CAMK4|IDBG-36661|ENSG00000152495|814|; PDE1C|IDBG-11559|ENSG00000154678|5137|;
G beta:gamma signalling through PI3Kgamma	13221	REACTOME	9606	2	47	0.0553916	0.246547	PIK3R1; PIK3R5;	PIK3R1|IDBG-25037|ENSG00000145675|5295|; PIK3R5|IDBG-29574|ENSG00000141506|23533|;
T cell receptor signaling pathway	563	KEGG	9606	3	107	0.0557489	0.243365	PIK3R1; PIK3R5; PTPN6;	PIK3R1|IDBG-25037|ENSG00000145675|5295|; PIK3R5|IDBG-29574|ENSG00000141506|23533|; PTPN6|IDBG-15719|ENSG00000111679|5777|;
Interleukin-3, 5 and GM-CSF signaling	13082	REACTOME	9606	2	48	0.0575041	0.246291	PIK3R1; PTPN6;	PIK3R1|IDBG-25037|ENSG00000145675|5295|; PTPN6|IDBG-15719|ENSG00000111679|5777|;
Amoebiasis	10358	KEGG	9606	3	109	0.0583022	0.245085	GNAS; PIK3R1; PIK3R5;	GNAS|IDBG-82827|ENSG00000087460|2778|; PIK3R1|IDBG-25037|ENSG00000145675|5295|; PIK3R5|IDBG-29574|ENSG00000141506|23533|;
Signaling by Interleukins	18744	REACTOME	9606	3	110	0.0595994	0.24159	PIK3R1; PTPN6; SKP1;	PIK3R1|IDBG-25037|ENSG00000145675|5295|; PTPN6|IDBG-15719|ENSG00000111679|5777|; SKP1|IDBG-44621|ENSG00000113558|6500|;
Phospholipase C-mediated cascade	13307	REACTOME	9606	2	49	0.0596443	0.229479	CAMK4; PDE1C;	CAMK4|IDBG-36661|ENSG00000152495|814|; PDE1C|IDBG-11559|ENSG00000154678|5137|;
Type II diabetes mellitus	577	KEGG	9606	2	49	0.0596443	0.229479	PIK3R1; PIK3R5;	PIK3R1|IDBG-25037|ENSG00000145675|5295|; PIK3R5|IDBG-29574|ENSG00000141506|23533|;
G-protein beta:gamma signalling	17727	REACTOME	9606	2	50	0.0618119	0.230021	PIK3R1; PIK3R5;	PIK3R1|IDBG-25037|ENSG00000145675|5295|; PIK3R5|IDBG-29574|ENSG00000141506|23533|;
mTOR signaling pathway	15244	PID NCI	9606	2	40	0.0414339806822221	0.24116701576575428	PDCD4; PML;	PDCD4|IDBG-89535|ENSG00000150593|100616113,27250|; PML|IDBG-21462|ENSG00000140464|5371|;
GPVI-mediated activation cascade	13127	REACTOME	9606	2	50	0.0618119	0.230021	PIK3R1; PIK3R5;	PIK3R1|IDBG-25037|ENSG00000145675|5295|; PIK3R5|IDBG-29574|ENSG00000141506|23533|;
TCR	15915	NETPATH	9606	5	259	0.058578875019942994	0.24177099326412835	ACP1; DNAJB1; EPHA3; PIK3R1; PTPN6;	ACP1|IDBG-25059|ENSG00000143727|52|; DNAJB1|IDBG-33491|ENSG00000132002|3337|; EPHA3|IDBG-45928|ENSG00000044524|2042|; PIK3R1|IDBG-25037|ENSG00000145675|5295|; PTPN6|IDBG-15719|ENSG00000111679|5777|;
HATs acetylate histones	16644	REACTOME	9606	3	114	0.0649235	0.237704	KAT6B; MORF4L1; RBBP7;	KAT6B|IDBG-79073|ENSG00000156650|23522|; MORF4L1|IDBG-25183|ENSG00000185787|10933|; RBBP7|IDBG-47673|ENSG00000102054|5931|;
Mitochondrial protein import	13376	REACTOME	9606	2	52	0.0662264	0.234897	PMPCB; TOMM20;	PMPCB|IDBG-34271|ENSG00000105819|9512|; TOMM20|IDBG-107524|ENSG00000173726|9804|;
Integrin-linked kinase signaling	15296	PID NCI	9606	2	45	0.05125263732536671	0.24238226401788007	TNS1; ZEB1;	TNS1|IDBG-80769|ENSG00000079308|7145|; ZEB1|IDBG-66941|ENSG00000148516|100996668,6935|;
Endometrial cancer	506	KEGG	9606	2	53	0.0684723	0.239126	PIK3R1; PIK3R5;	PIK3R1|IDBG-25037|ENSG00000145675|5295|; PIK3R5|IDBG-29574|ENSG00000141506|23533|;
Circadian Clock	13672	REACTOME	9606	2	55	0.0730387	0.247459	RORA; SKP1;	RORA|IDBG-14920|ENSG00000069667|6095|; SKP1|IDBG-44621|ENSG00000113558|6500|;
Signaling events mediated by PTP1B	15198	PID NCI	9606	2	45	0.05125263732536671	0.24238226401788007	LEP; PIK3R1;	LEP|IDBG-39587|ENSG00000174697|3952|; PIK3R1|IDBG-25037|ENSG00000145675|5295|;
Leukocyte transendothelial migration	510	KEGG	9606	3	120	0.0733067	0.244715	EZR; PIK3R1; PIK3R5;	EZR|IDBG-98477|ENSG00000092820|7430|; PIK3R1|IDBG-25037|ENSG00000145675|5295|; PIK3R5|IDBG-29574|ENSG00000141506|23533|;
Neurotrophin signaling pathway	4379	KEGG	9606	3	121	0.0747491	0.245914	CAMK4; PIK3R1; PIK3R5;	CAMK4|IDBG-36661|ENSG00000152495|814|; PIK3R1|IDBG-25037|ENSG00000145675|5295|; PIK3R5|IDBG-29574|ENSG00000141506|23533|;
Non-small cell lung cancer	444	KEGG	9606	2	57	0.0777008	0.251973	PIK3R1; PIK3R5;	PIK3R1|IDBG-25037|ENSG00000145675|5295|; PIK3R5|IDBG-29574|ENSG00000141506|23533|;
Interferon alpha/beta signaling	13074	REACTOME	9606	2	59	0.0824546	0.259961	IFIT3; PTPN6;	IFIT3|IDBG-81919|ENSG00000119917|3437|; PTPN6|IDBG-15719|ENSG00000111679|5777|;
Validated transcriptional targets of TAp63 isoforms	15683	PID NCI	9606	2	54	0.07074323762843843	0.24331386275235642	DST; PML;	DST|IDBG-91303|ENSG00000151914|667|; PML|IDBG-21462|ENSG00000140464|5371|;
Signaling by SCF-KIT	13325	REACTOME	9606	3	127	0.0836663	0.260168	PIK3R1; PTPN6; PTPRU;	PIK3R1|IDBG-25037|ENSG00000145675|5295|; PTPN6|IDBG-15719|ENSG00000111679|5777|; PTPRU|IDBG-95340|ENSG00000060656|10076|;
Natural killer cell mediated cytotoxicity	578	KEGG	9606	3	130	0.0882897	0.267223	PIK3R1; PIK3R5; PTPN6;	PIK3R1|IDBG-25037|ENSG00000145675|5295|; PIK3R5|IDBG-29574|ENSG00000141506|23533|; PTPN6|IDBG-15719|ENSG00000111679|5777|;
VEGF signaling pathway	432	KEGG	9606	2	62	0.0897482	0.264582	PIK3R1; PIK3R5;	PIK3R1|IDBG-25037|ENSG00000145675|5295|; PIK3R5|IDBG-29574|ENSG00000141506|23533|;
mTOR signaling pathway	405	KEGG	9606	2	62	0.0897482	0.264582	PIK3R1; PIK3R5;	PIK3R1|IDBG-25037|ENSG00000145675|5295|; PIK3R5|IDBG-29574|ENSG00000141506|23533|;
Cell-Cell communication	17071	REACTOME	9606	3	132	0.0914312	0.266088	DST; PIK3R1; PTPN6;	DST|IDBG-91303|ENSG00000151914|667|; PIK3R1|IDBG-25037|ENSG00000145675|5295|; PTPN6|IDBG-15719|ENSG00000111679|5777|;
Colorectal cancer	442	KEGG	9606	2	63	0.0922208	0.258446	PIK3R1; PIK3R5;	PIK3R1|IDBG-25037|ENSG00000145675|5295|; PIK3R5|IDBG-29574|ENSG00000141506|23533|;
Interferon gamma signaling	13077	REACTOME	9606	2	63	0.0922208	0.258446	PML; PTPN6;	PML|IDBG-21462|ENSG00000140464|5371|; PTPN6|IDBG-15719|ENSG00000111679|5777|;
Osteoclast differentiation	10367	KEGG	9606	3	133	0.0930194	0.257505	CAMK4; PIK3R1; PIK3R5;	CAMK4|IDBG-36661|ENSG00000152495|814|; PIK3R1|IDBG-25037|ENSG00000145675|5295|; PIK3R5|IDBG-29574|ENSG00000141506|23533|;
Downstream signaling of activated FGFR	16879	REACTOME	9606	3	134	0.0946191	0.258778	CAMK4; PDE1C; PIK3R1;	CAMK4|IDBG-36661|ENSG00000152495|814|; PDE1C|IDBG-11559|ENSG00000154678|5137|; PIK3R1|IDBG-25037|ENSG00000145675|5295|;
Costimulation by the CD28 family	13092	REACTOME	9606	2	64	0.0947134	0.25294	PIK3R1; PTPN6;	PIK3R1|IDBG-25037|ENSG00000145675|5295|; PTPN6|IDBG-15719|ENSG00000111679|5777|;
Hepatitis C	10404	KEGG	9606	3	136	0.0978527	0.255317	DDX58; PIK3R1; PIK3R5;	DDX58|IDBG-55854|ENSG00000107201|23586|; PIK3R1|IDBG-25037|ENSG00000145675|5295|; PIK3R5|IDBG-29574|ENSG00000141506|23533|;
Neurotransmitter Receptor Binding And Downstream Transmission In The Postsynaptic Cell	19389	REACTOME	9606	3	136	0.0978527	0.255317	CAMK4; KCNJ12; NSF;	CAMK4|IDBG-36661|ENSG00000152495|814|; KCNJ12|IDBG-35680|ENSG00000184185|100996843,3768|; NSF|IDBG-55627|ENSG00000073969|101930324,4905|;
HIF-1-alpha transcription factor network	15518	PID NCI	9606	2	64	0.09471338074702529	0.2529404403479381	LEP; RORA;	LEP|IDBG-39587|ENSG00000174697|3952|; RORA|IDBG-14920|ENSG00000069667|6095|;
Glioma	523	KEGG	9606	2	66	0.0997564	0.257326	PIK3R1; PIK3R5;	PIK3R1|IDBG-25037|ENSG00000145675|5295|; PIK3R5|IDBG-29574|ENSG00000141506|23533|;
Phospholipid metabolism	18830	REACTOME	9606	3	138	0.101131	0.257941	PIK3R1; PIK3R5; VAC14;	PIK3R1|IDBG-25037|ENSG00000145675|5295|; PIK3R5|IDBG-29574|ENSG00000141506|23533|; VAC14|IDBG-40481|ENSG00000103043|55697|;
Pancreatic cancer	593	KEGG	9606	2	67	0.102306	0.258038	PIK3R1; PIK3R5;	PIK3R1|IDBG-25037|ENSG00000145675|5295|; PIK3R5|IDBG-29574|ENSG00000141506|23533|;
Ubiquitin mediated proteolysis	519	KEGG	9606	3	140	0.104454	0.26056	PML; SKP1; UBE2R2;	PML|IDBG-21462|ENSG00000140464|5371|; SKP1|IDBG-44621|ENSG00000113558|6500|; UBE2R2|IDBG-58571|ENSG00000107341|54926|;
Renal cell carcinoma	483	KEGG	9606	2	68	0.104873	0.258764	PIK3R1; PIK3R5;	PIK3R1|IDBG-25037|ENSG00000145675|5295|; PIK3R5|IDBG-29574|ENSG00000141506|23533|;
Fc epsilon RI signaling pathway	435	KEGG	9606	2	71	0.11268	0.275036	PIK3R1; PIK3R5;	PIK3R1|IDBG-25037|ENSG00000145675|5295|; PIK3R5|IDBG-29574|ENSG00000141506|23533|;
Signaling by FGFR	13320	REACTOME	9606	3	145	0.112947	0.272754	CAMK4; PDE1C; PIK3R1;	CAMK4|IDBG-36661|ENSG00000152495|814|; PDE1C|IDBG-11559|ENSG00000154678|5137|; PIK3R1|IDBG-25037|ENSG00000145675|5295|;
Downstream signal transduction	13329	REACTOME	9606	3	146	0.114676	0.274016	CAMK4; PDE1C; PIK3R1;	CAMK4|IDBG-36661|ENSG00000152495|814|; PDE1C|IDBG-11559|ENSG00000154678|5137|; PIK3R1|IDBG-25037|ENSG00000145675|5295|;
Melanoma	490	KEGG	9606	2	72	0.115315	0.269862	PIK3R1; PIK3R5;	PIK3R1|IDBG-25037|ENSG00000145675|5295|; PIK3R5|IDBG-29574|ENSG00000141506|23533|;
DAP12 signaling	13003	REACTOME	9606	3	147	0.116416	0.269658	CAMK4; PDE1C; PIK3R1;	CAMK4|IDBG-36661|ENSG00000152495|814|; PDE1C|IDBG-11559|ENSG00000154678|5137|; PIK3R1|IDBG-25037|ENSG00000145675|5295|;
Adherens junction	505	KEGG	9606	2	73	0.117967	0.270489	ACP1; PTPN6;	ACP1|IDBG-25059|ENSG00000143727|52|; PTPN6|IDBG-15719|ENSG00000111679|5777|;
Signaling by ERBB2	13291	REACTOME	9606	3	149	0.119926	0.272233	CAMK4; PDE1C; PIK3R1;	CAMK4|IDBG-36661|ENSG00000152495|814|; PDE1C|IDBG-11559|ENSG00000154678|5137|; PIK3R1|IDBG-25037|ENSG00000145675|5295|;
Chronic myeloid leukemia	582	KEGG	9606	2	74	0.120633	0.260798	PIK3R1; PIK3R5;	PIK3R1|IDBG-25037|ENSG00000145675|5295|; PIK3R5|IDBG-29574|ENSG00000141506|23533|;
ECM proteoglycans	18499	REACTOME	9606	2	74	0.120633	0.260798	DCN; TNN;	DCN|IDBG-50872|ENSG00000011465|1634|; TNN|IDBG-104971|ENSG00000120332|63923|;
RNA degradation	5710	KEGG	9606	2	74	0.120633	0.260798	CNOT6L; DHX36;	CNOT6L|IDBG-25831|ENSG00000138767|246175|; DHX36|IDBG-62011|ENSG00000174953|170506|;
Gastric acid secretion	10356	KEGG	9606	2	76	0.126011	0.264857	EZR; GNAS;	EZR|IDBG-98477|ENSG00000092820|7430|; GNAS|IDBG-82827|ENSG00000087460|2778|;
Platelet homeostasis	13108	REACTOME	9606	2	76	0.126011	0.264857	GNAS; PTPN6;	GNAS|IDBG-82827|ENSG00000087460|2778|; PTPN6|IDBG-15719|ENSG00000111679|5777|;
Bacterial invasion of epithelial cells	10364	KEGG	9606	2	77	0.128722	0.265635	PIK3R1; PIK3R5;	PIK3R1|IDBG-25037|ENSG00000145675|5295|; PIK3R5|IDBG-29574|ENSG00000141506|23533|;
BCR signaling pathway	15384	PID NCI	9606	2	63	0.09222081161165556	0.2584459782203187	PIK3R1; PTPN6;	PIK3R1|IDBG-25037|ENSG00000145675|5295|; PTPN6|IDBG-15719|ENSG00000111679|5777|;
Transcriptional regulation of white adipocyte differentiation	13879	REACTOME	9606	2	77	0.128722	0.265635	LEP; MED26;	LEP|IDBG-39587|ENSG00000174697|3952|; MED26|IDBG-35738|ENSG00000105085|9441|;
DAP12 interactions	13004	REACTOME	9606	3	155	0.130689	0.267265	CAMK4; PDE1C; PIK3R1;	CAMK4|IDBG-36661|ENSG00000152495|814|; PDE1C|IDBG-11559|ENSG00000154678|5137|; PIK3R1|IDBG-25037|ENSG00000145675|5295|;
RIG-I/MDA5 mediated induction of IFN-alpha/beta pathways	13017	REACTOME	9606	2	78	0.131446	0.264056	DDX58; DHX36;	DDX58|IDBG-55854|ENSG00000107201|23586|; DHX36|IDBG-62011|ENSG00000174953|170506|;
Regulation of PLK1 Activity at G2/M Transition	12974	REACTOME	9606	2	78	0.131446	0.264056	CLASP1; SKP1;	CLASP1|IDBG-68461|ENSG00000074054|23332|; SKP1|IDBG-44621|ENSG00000113558|6500|;
IL5	15921	NETPATH	9606	2	59	0.08245459561645434	0.2599610167352102	PIK3R1; PTPN6;	PIK3R1|IDBG-25037|ENSG00000145675|5295|; PTPN6|IDBG-15719|ENSG00000111679|5777|;
TGF-beta signaling pathway	465	KEGG	9606	2	80	0.136935	0.272669	DCN; SKP1;	DCN|IDBG-50872|ENSG00000011465|1634|; SKP1|IDBG-44621|ENSG00000113558|6500|;
Opioid Signalling	13260	REACTOME	9606	2	82	0.142474	0.276424	CAMK4; PDE1C;	CAMK4|IDBG-36661|ENSG00000152495|814|; PDE1C|IDBG-11559|ENSG00000154678|5137|;
Signaling events mediated by VEGFR1 and VEGFR2	15504	PID NCI	9606	2	60	0.08486456594971284	0.26032779014303803	PIK3R1; PTPN6;	PIK3R1|IDBG-25037|ENSG00000145675|5295|; PTPN6|IDBG-15719|ENSG00000111679|5777|;
Defective AMN causes hereditary megaloblastic anemia 1	17554	REACTOME	9606	2	83	0.145262	0.240689	PANK2; PDXK;	PANK2|IDBG-49219|ENSG00000125779|80025|; PDXK|IDBG-4833|ENSG00000160209|8566|;
Defective BTD causes biotidinase deficiency	18399	REACTOME	9606	2	83	0.145262	0.240689	PANK2; PDXK;	PANK2|IDBG-49219|ENSG00000125779|80025|; PDXK|IDBG-4833|ENSG00000160209|8566|;
Alpha6Beta4Integrin	15905	NETPATH	9606	2	74	0.12063337103135341	0.26079785927730686	DST; PIK3R1;	DST|IDBG-91303|ENSG00000151914|667|; PIK3R1|IDBG-25037|ENSG00000145675|5295|;
Defective CD320 causes methylmalonic aciduria	17952	REACTOME	9606	2	83	0.145262	0.240689	PANK2; PDXK;	PANK2|IDBG-49219|ENSG00000125779|80025|; PDXK|IDBG-4833|ENSG00000160209|8566|;
Defective CUBN causes hereditary megaloblastic anemia 1	18799	REACTOME	9606	2	83	0.145262	0.240689	PANK2; PDXK;	PANK2|IDBG-49219|ENSG00000125779|80025|; PDXK|IDBG-4833|ENSG00000160209|8566|;
IL4	15920	NETPATH	9606	2	74	0.12063337103135341	0.26079785927730686	PIK3R1; PTPN6;	PIK3R1|IDBG-25037|ENSG00000145675|5295|; PTPN6|IDBG-15719|ENSG00000111679|5777|;
Defective GIF causes intrinsic factor deficiency	18673	REACTOME	9606	2	83	0.145262	0.240689	PANK2; PDXK;	PANK2|IDBG-49219|ENSG00000125779|80025|; PDXK|IDBG-4833|ENSG00000160209|8566|;
EGFR1	15908	NETPATH	9606	6	472	0.1826300349440364	0.2623861894449131	ACP1; AHCYL1; PIK3R1; PTPN6; RBBP7; TNS1;	ACP1|IDBG-25059|ENSG00000143727|52|; AHCYL1|IDBG-100935|ENSG00000168710|10768|; PIK3R1|IDBG-25037|ENSG00000145675|5295|; PTPN6|IDBG-15719|ENSG00000111679|5777|; RBBP7|IDBG-47673|ENSG00000102054|5931|; TNS1|IDBG-80769|ENSG00000079308|7145|;
Defective HLCS causes multiple carboxylase deficiency	17039	REACTOME	9606	2	83	0.145262	0.240689	PANK2; PDXK;	PANK2|IDBG-49219|ENSG00000125779|80025|; PDXK|IDBG-4833|ENSG00000160209|8566|;
Leptin	15926	NETPATH	9606	2	96	0.1824238160074065	0.2637592753737661	LEP; PIK3R1;	LEP|IDBG-39587|ENSG00000174697|3952|; PIK3R1|IDBG-25037|ENSG00000145675|5295|;
Defective LMBRD1 causes methylmalonic aciduria and homocystinuria type cblF	17742	REACTOME	9606	2	83	0.145262	0.240689	PANK2; PDXK;	PANK2|IDBG-49219|ENSG00000125779|80025|; PDXK|IDBG-4833|ENSG00000160209|8566|;
Defective MMAA causes methylmalonic aciduria type cblA	17043	REACTOME	9606	2	83	0.145262	0.240689	PANK2; PDXK;	PANK2|IDBG-49219|ENSG00000125779|80025|; PDXK|IDBG-4833|ENSG00000160209|8566|;
Defective MMAB causes methylmalonic aciduria type cblB	19453	REACTOME	9606	2	83	0.145262	0.240689	PANK2; PDXK;	PANK2|IDBG-49219|ENSG00000125779|80025|; PDXK|IDBG-4833|ENSG00000160209|8566|;
Defective MMACHC causes methylmalonic aciduria and homocystinuria type cblC	18190	REACTOME	9606	2	83	0.145262	0.240689	PANK2; PDXK;	PANK2|IDBG-49219|ENSG00000125779|80025|; PDXK|IDBG-4833|ENSG00000160209|8566|;
Defective MMADHC causes methylmalonic aciduria and homocystinuria type cblD	19174	REACTOME	9606	2	83	0.145262	0.240689	PANK2; PDXK;	PANK2|IDBG-49219|ENSG00000125779|80025|; PDXK|IDBG-4833|ENSG00000160209|8566|;
Defective MTR causes methylmalonic aciduria and homocystinuria type cblG	17731	REACTOME	9606	2	83	0.145262	0.240689	PANK2; PDXK;	PANK2|IDBG-49219|ENSG00000125779|80025|; PDXK|IDBG-4833|ENSG00000160209|8566|;
Notch	15907	NETPATH	9606	2	76	0.12601142126662251	0.2648573391437343	PIK3R1; SKP1;	PIK3R1|IDBG-25037|ENSG00000145675|5295|; SKP1|IDBG-44621|ENSG00000113558|6500|;
Defective MTRR causes methylmalonic aciduria and homocystinuria type cblE	19395	REACTOME	9606	2	83	0.145262	0.240689	PANK2; PDXK;	PANK2|IDBG-49219|ENSG00000125779|80025|; PDXK|IDBG-4833|ENSG00000160209|8566|;
Defective MUT causes methylmalonic aciduria mut type	17040	REACTOME	9606	2	83	0.145262	0.240689	PANK2; PDXK;	PANK2|IDBG-49219|ENSG00000125779|80025|; PDXK|IDBG-4833|ENSG00000160209|8566|;
Defective TCN2 causes hereditary megaloblastic anemia	17169	REACTOME	9606	2	83	0.145262	0.240689	PANK2; PDXK;	PANK2|IDBG-49219|ENSG00000125779|80025|; PDXK|IDBG-4833|ENSG00000160209|8566|;
Nfat and hypertrophy of the heart	4058	PID BIOCARTA	9606	2	44	0.049227243547814055	0.26606153060366167	CAMK4; PIK3R1;	CAMK4|IDBG-36661|ENSG00000152495|814|; PIK3R1|IDBG-25037|ENSG00000145675|5295|;
Defects in biotin (Btn) metabolism	18233	REACTOME	9606	2	83	0.145262	0.240689	PANK2; PDXK;	PANK2|IDBG-49219|ENSG00000125779|80025|; PDXK|IDBG-4833|ENSG00000160209|8566|;
Defects in cobalamin (B12) metabolism	18060	REACTOME	9606	2	83	0.145262	0.240689	PANK2; PDXK;	PANK2|IDBG-49219|ENSG00000125779|80025|; PDXK|IDBG-4833|ENSG00000160209|8566|;
Defects in vitamin and cofactor metabolism	18729	REACTOME	9606	2	83	0.145262	0.240689	PANK2; PDXK;	PANK2|IDBG-49219|ENSG00000125779|80025|; PDXK|IDBG-4833|ENSG00000160209|8566|;
Transcription factor creb and its extracellular signals	4014	PID BIOCARTA	9606	2	27	0.0199436718991977	0.26630667771281635	GNAS; PIK3R1;	GNAS|IDBG-82827|ENSG00000087460|2778|; PIK3R1|IDBG-25037|ENSG00000145675|5295|;
Metabolism of vitamins and cofactors	19866	REACTOME	9606	2	83	0.145262	0.240689	PANK2; PDXK;	PANK2|IDBG-49219|ENSG00000125779|80025|; PDXK|IDBG-4833|ENSG00000160209|8566|;
Metabolism of water-soluble vitamins and cofactors	17389	REACTOME	9606	2	83	0.145262	0.240689	PANK2; PDXK;	PANK2|IDBG-49219|ENSG00000125779|80025|; PDXK|IDBG-4833|ENSG00000160209|8566|;
Signaling by EGFR	13216	REACTOME	9606	3	164	0.147445	0.242537	CAMK4; PDE1C; PIK3R1;	CAMK4|IDBG-36661|ENSG00000152495|814|; PDE1C|IDBG-11559|ENSG00000154678|5137|; PIK3R1|IDBG-25037|ENSG00000145675|5295|;
Signaling by EGFR in Cancer	16839	REACTOME	9606	3	166	0.151262	0.243521	CAMK4; PDE1C; PIK3R1;	CAMK4|IDBG-36661|ENSG00000152495|814|; PDE1C|IDBG-11559|ENSG00000154678|5137|; PIK3R1|IDBG-25037|ENSG00000145675|5295|;
Apoptosis	485	KEGG	9606	2	88	0.159366	0.25298	PIK3R1; PIK3R5;	PIK3R1|IDBG-25037|ENSG00000145675|5295|; PIK3R5|IDBG-29574|ENSG00000141506|23533|;
Small cell lung cancer	527	KEGG	9606	2	88	0.159366	0.25298	PIK3R1; PIK3R5;	PIK3R1|IDBG-25037|ENSG00000145675|5295|; PIK3R5|IDBG-29574|ENSG00000141506|23533|;
Protein processing in endoplasmic reticulum	10363	KEGG	9606	3	171	0.160941	0.253706	DNAJB1; SEC62; SKP1;	DNAJB1|IDBG-33491|ENSG00000132002|3337|; SEC62|IDBG-64313|ENSG00000008952|7095|; SKP1|IDBG-44621|ENSG00000113558|6500|;
Regulation of nuclear beta catenin signaling and target gene transcription	15295	PID NCI	9606	2	72	0.11531545010026721	0.26986192961608924	CAMK4; SKP1;	CAMK4|IDBG-36661|ENSG00000152495|814|; SKP1|IDBG-44621|ENSG00000113558|6500|;
ErbB signaling pathway	461	KEGG	9606	2	89	0.162217	0.253954	PIK3R1; PIK3R5;	PIK3R1|IDBG-25037|ENSG00000145675|5295|; PIK3R5|IDBG-29574|ENSG00000141506|23533|;
Dilated cardiomyopathy	5714	KEGG	9606	2	90	0.165078	0.254917	GNAS; TPM2;	GNAS|IDBG-82827|ENSG00000087460|2778|; TPM2|IDBG-63176|ENSG00000198467|7169|;
Prostate cancer	544	KEGG	9606	2	90	0.165078	0.254917	PIK3R1; PIK3R5;	PIK3R1|IDBG-25037|ENSG00000145675|5295|; PIK3R5|IDBG-29574|ENSG00000141506|23533|;
Generic Transcription Pathway	13742	REACTOME	9606	6	458	0.165927	0.254497	MED26; RORA; ZNF418; ZNF425; ZNF460; ZNF548;	MED26|IDBG-35738|ENSG00000105085|9441|; RORA|IDBG-14920|ENSG00000069667|6095|; ZNF418|IDBG-72822|ENSG00000196724|147686|; ZNF425|IDBG-47223|ENSG00000204947|155054|; ZNF460|IDBG-71924|ENSG00000197714|10794|; ZNF548|IDBG-72033|ENSG00000188785|147694|;
Signaling by PDGF	13330	REACTOME	9606	3	174	0.166839	0.254177	CAMK4; PDE1C; PIK3R1;	CAMK4|IDBG-36661|ENSG00000152495|814|; PDE1C|IDBG-11559|ENSG00000154678|5137|; PIK3R1|IDBG-25037|ENSG00000145675|5295|;
Progesterone-mediated oocyte maturation	5712	KEGG	9606	2	91	0.167948	0.254162	PIK3R1; PIK3R5;	PIK3R1|IDBG-25037|ENSG00000145675|5295|; PIK3R5|IDBG-29574|ENSG00000141506|23533|;
IL2	15918	NETPATH	9606	2	81	0.13969844367357337	0.2757525801208796	PIK3R1; PTPN6;	PIK3R1|IDBG-25037|ENSG00000145675|5295|; PTPN6|IDBG-15719|ENSG00000111679|5777|;
Metabolism	19429	REACTOME	9606	16	1535	0.169239	0.254418	ATP5S; DCN; GLRX; GNAS; KYNU; MED26; MGST3; PANK2; PDXK; PFKFB4; PIK3R1; PIK3R5; PLCD3; PMVK; RORA; VAC14;	ATP5S|IDBG-5967|ENSG00000125375|27109|; DCN|IDBG-50872|ENSG00000011465|1634|; GLRX|IDBG-34038|ENSG00000173221|2745|; GNAS|IDBG-82827|ENSG00000087460|2778|; KYNU|IDBG-71532|ENSG00000115919|8942|; MED26|IDBG-35738|ENSG00000105085|9441|; MGST3|IDBG-104471|ENSG00000143198|4259|; PANK2|IDBG-49219|ENSG00000125779|80025|; PDXK|IDBG-4833|ENSG00000160209|8566|; PFKFB4|IDBG-32970|ENSG00000114268|5210|; PIK…
Innate Immune System	17476	REACTOME	9606	7	563	0.170153	0.25411	C7; CAMK4; DDX58; DHX36; MEFV; PDE1C; PIK3R1;	C7|IDBG-18519|ENSG00000112936|730|; CAMK4|IDBG-36661|ENSG00000152495|814|; DDX58|IDBG-55854|ENSG00000107201|23586|; DHX36|IDBG-62011|ENSG00000174953|170506|; MEFV|IDBG-11729|ENSG00000103313|4210|; PDE1C|IDBG-11559|ENSG00000154678|5137|; PIK3R1|IDBG-25037|ENSG00000145675|5295|;
TSLP	15928	NETPATH	9606	3	161	0.14178195192619933	0.27745261282109696	CDCA8; PPP1R11; PTPN6;	CDCA8|IDBG-96468|ENSG00000134690|55143|; PPP1R11|IDBG-75596|ENSG00000204619|6992|; PTPN6|IDBG-15719|ENSG00000111679|5777|;
Fc gamma R-mediated phagocytosis	4359	KEGG	9606	2	93	0.173715	0.257733	PIK3R1; PIK3R5;	PIK3R1|IDBG-25037|ENSG00000145675|5295|; PIK3R5|IDBG-29574|ENSG00000141506|23533|;
Signalling by NGF	16818	REACTOME	9606	4	271	0.176711	0.260477	CAMK4; PCSK6; PDE1C; PIK3R1;	CAMK4|IDBG-36661|ENSG00000152495|814|; PCSK6|IDBG-32449|ENSG00000140479|100507472,5046|; PDE1C|IDBG-11559|ENSG00000154678|5137|; PIK3R1|IDBG-25037|ENSG00000145675|5295|;
Trk receptor signaling mediated by PI3K and PLC-gamma	14893	PID NCI	9606	2	26	0.018562654487192187	0.2809148379061751	CAMK4; PIK3R1;	CAMK4|IDBG-36661|ENSG00000152495|814|; PIK3R1|IDBG-25037|ENSG00000145675|5295|;
Metabolism of proteins	18366	REACTOME	9606	8	678	0.181742	0.266165	ADAMTS9; EIF3C; KLK1; LEP; PMPCB; PROZ; TBCB; TOMM20;	ADAMTS9|IDBG-43120|ENSG00000163638|56999|; EIF3C|IDBG-23122|ENSG00000184110|8663|; KLK1|IDBG-64886|ENSG00000167748|3816|; LEP|IDBG-39587|ENSG00000174697|3952|; PMPCB|IDBG-34271|ENSG00000105819|9512|; PROZ|IDBG-52386|ENSG00000126231|8858|; TBCB|IDBG-46531|ENSG00000105254|1155|; TOMM20|IDBG-107524|ENSG00000173726|9804|;
Transport of glucose and other sugars, bile salts and organic acids, metal ions and amine compounds	13159	REACTOME	9606	2	96	0.182424	0.263759	RHCG; SLC11A2;	RHCG|IDBG-29352|ENSG00000140519|51458|; SLC11A2|IDBG-32924|ENSG00000110911|4891|;
Cell surface interactions at the vascular wall	13112	REACTOME	9606	2	98	0.188266	0.268783	PIK3R1; PTPN6;	PIK3R1|IDBG-25037|ENSG00000145675|5295|; PTPN6|IDBG-15719|ENSG00000111679|5777|;
Gene Expression	19770	REACTOME	9606	12	1118	0.189396	0.268705	CNOT6L; EIF3C; FUS; GTF3A; MED26; RBBP7; RNMT; RORA; ZNF418; ZNF425; ZNF460; ZNF548;	CNOT6L|IDBG-25831|ENSG00000138767|246175|; EIF3C|IDBG-23122|ENSG00000184110|8663|; FUS|IDBG-27917|ENSG00000089280|2521|; GTF3A|IDBG-19126|ENSG00000122034|2971|; MED26|IDBG-35738|ENSG00000105085|9441|; RBBP7|IDBG-47673|ENSG00000102054|5931|; RNMT|IDBG-1256|ENSG00000101654|8731|; RORA|IDBG-14920|ENSG00000069667|6095|; ZNF418|IDBG-72822|ENSG00000196724|147686|; ZNF425|IDBG-47223|ENSG00000204947|1550…
Immune System	18444	REACTOME	9606	12	1127	0.196778	0.277445	C7; CAMK4; DDX58; DHX36; IFIT3; MEFV; PDE1C; PIK3R1; PML; PTPN6; SKP1; UBE2R2;	C7|IDBG-18519|ENSG00000112936|730|; CAMK4|IDBG-36661|ENSG00000152495|814|; DDX58|IDBG-55854|ENSG00000107201|23586|; DHX36|IDBG-62011|ENSG00000174953|170506|; IFIT3|IDBG-81919|ENSG00000119917|3437|; MEFV|IDBG-11729|ENSG00000103313|4210|; PDE1C|IDBG-11559|ENSG00000154678|5137|; PIK3R1|IDBG-25037|ENSG00000145675|5295|; PML|IDBG-21462|ENSG00000140464|5371|; PTPN6|IDBG-15719|ENSG00000111679|5777|; SKP…
Prolactin	15931	NETPATH	9606	2	105	0.20890833274797807	0.2839652187652157	PIK3R1; PTPN6;	PIK3R1|IDBG-25037|ENSG00000145675|5295|; PTPN6|IDBG-15719|ENSG00000111679|5777|;
NGF signalling via TRKA from the plasma membrane	18753	REACTOME	9606	3	191	0.201383	0.282185	CAMK4; PDE1C; PIK3R1;	CAMK4|IDBG-36661|ENSG00000152495|814|; PDE1C|IDBG-11559|ENSG00000154678|5137|; PIK3R1|IDBG-25037|ENSG00000145675|5295|;
Toll-like receptor signaling pathway	564	KEGG	9606	2	103	0.202983	0.282682	PIK3R1; PIK3R5;	PIK3R1|IDBG-25037|ENSG00000145675|5295|; PIK3R5|IDBG-29574|ENSG00000141506|23533|;
Chromatin modifying enzymes	19015	REACTOME	9606	3	193	0.205558	0.282798	KAT6B; MORF4L1; RBBP7;	KAT6B|IDBG-79073|ENSG00000156650|23522|; MORF4L1|IDBG-25183|ENSG00000185787|10933|; RBBP7|IDBG-47673|ENSG00000102054|5931|;
Chromatin organization	18782	REACTOME	9606	3	193	0.205558	0.282798	KAT6B; MORF4L1; RBBP7;	KAT6B|IDBG-79073|ENSG00000156650|23522|; MORF4L1|IDBG-25183|ENSG00000185787|10933|; RBBP7|IDBG-47673|ENSG00000102054|5931|;
Transmission across Chemical Synapses	18918	REACTOME	9606	3	194	0.207653	0.283959	CAMK4; KCNJ12; NSF;	CAMK4|IDBG-36661|ENSG00000152495|814|; KCNJ12|IDBG-35680|ENSG00000184185|100996843,3768|; NSF|IDBG-55627|ENSG00000073969|101930324,4905|;
PPARA activates gene expression	13457	REACTOME	9606	2	107	0.214852	0.290306	MED26; RORA;	MED26|IDBG-35738|ENSG00000105085|9441|; RORA|IDBG-14920|ENSG00000069667|6095|;
Developmental Biology	16794	REACTOME	9606	6	502	0.220565	0.296261	CLASP1; EPHA3; EZR; LEP; MED26; PCSK6;	CLASP1|IDBG-68461|ENSG00000074054|23332|; EPHA3|IDBG-45928|ENSG00000044524|2042|; EZR|IDBG-98477|ENSG00000092820|7430|; LEP|IDBG-39587|ENSG00000174697|3952|; MED26|IDBG-35738|ENSG00000105085|9441|; PCSK6|IDBG-32449|ENSG00000140479|100507472,5046|;
Regulation of lipid metabolism by Peroxisome proliferator-activated receptor alpha (PPARalpha)	13458	REACTOME	9606	2	109	0.220812	0.294848	MED26; RORA;	MED26|IDBG-35738|ENSG00000105085|9441|; RORA|IDBG-14920|ENSG00000069667|6095|;
Hedgehog 'off' state	18085	REACTOME	9606	2	112	0.229778	0.303253	GNAS; SKP1;	GNAS|IDBG-82827|ENSG00000087460|2778|; SKP1|IDBG-44621|ENSG00000113558|6500|;
Resolution of Sister Chromatid Cohesion	12939	REACTOME	9606	2	112	0.229778	0.303253	CDCA8; CLASP1;	CDCA8|IDBG-96468|ENSG00000134690|55143|; CLASP1|IDBG-68461|ENSG00000074054|23332|;
Degradation of the extracellular matrix	17498	REACTOME	9606	2	116	0.241771	0.317237	ADAMTS9; DCN;	ADAMTS9|IDBG-43120|ENSG00000163638|56999|; DCN|IDBG-50872|ENSG00000011465|1634|;
Focal adhesion	546	KEGG	9606	3	210	0.241786	0.315433	PIK3R1; PIK3R5; TNN;	PIK3R1|IDBG-25037|ENSG00000145675|5295|; PIK3R5|IDBG-29574|ENSG00000141506|23533|; TNN|IDBG-104971|ENSG00000120332|63923|;
Toxoplasmosis	10385	KEGG	9606	2	119	0.250787	0.325307	PIK3R1; PIK3R5;	PIK3R1|IDBG-25037|ENSG00000145675|5295|; PIK3R5|IDBG-29574|ENSG00000141506|23533|;
G2/M Transition	18803	REACTOME	9606	2	120	0.253795	0.325489	CLASP1; SKP1;	CLASP1|IDBG-68461|ENSG00000074054|23332|; SKP1|IDBG-44621|ENSG00000113558|6500|;
Mitotic Prometaphase	12940	REACTOME	9606	2	120	0.253795	0.325489	CDCA8; CLASP1;	CDCA8|IDBG-96468|ENSG00000134690|55143|; CLASP1|IDBG-68461|ENSG00000074054|23332|;
Ras-independent pathway in nk cell-mediated cytotoxicity	4025	PID BIOCARTA	9606	2	22	0.013471545874363713	0.3397823237200625	PIK3R1; PTPN6;	PIK3R1|IDBG-25037|ENSG00000145675|5295|; PTPN6|IDBG-15719|ENSG00000111679|5777|;
Regulation of actin cytoskeleton	404	KEGG	9606	3	217	0.257017	0.327769	EZR; PIK3R1; PIK3R5;	EZR|IDBG-98477|ENSG00000092820|7430|; PIK3R1|IDBG-25037|ENSG00000145675|5295|; PIK3R5|IDBG-29574|ENSG00000141506|23533|;
IL4-mediated signaling events	15439	PID NCI	9606	3	60	0.012565455932946317	0.3565448120973517	GTF3A; PIK3R1; PTPN6;	GTF3A|IDBG-19126|ENSG00000122034|2971|; PIK3R1|IDBG-25037|ENSG00000145675|5295|; PTPN6|IDBG-15719|ENSG00000111679|5777|;
Corticosteroids and cardioprotection	3970	PID BIOCARTA	9606	2	24	0.015928959175955784	0.36158737329419627	GNAS; PIK3R1;	GNAS|IDBG-82827|ENSG00000087460|2778|; PIK3R1|IDBG-25037|ENSG00000145675|5295|;
Mitotic G2-G2/M phases	19400	REACTOME	9606	2	122	0.259814	0.327655	CLASP1; SKP1;	CLASP1|IDBG-68461|ENSG00000074054|23332|; SKP1|IDBG-44621|ENSG00000113558|6500|;
RNA Polymerase I, RNA Polymerase III, and Mitochondrial Transcription	19264	REACTOME	9606	2	122	0.259814	0.327655	GTF3A; RBBP7;	GTF3A|IDBG-19126|ENSG00000122034|2971|; RBBP7|IDBG-47673|ENSG00000102054|5931|;
Signaling by Hedgehog	16836	REACTOME	9606	2	128	0.27788	0.348502	GNAS; SKP1;	GNAS|IDBG-82827|ENSG00000087460|2778|; SKP1|IDBG-44621|ENSG00000113558|6500|;
Metabolism of lipids and lipoproteins	16920	REACTOME	9606	6	554	0.291797	0.363945	MED26; PIK3R1; PIK3R5; PMVK; RORA; VAC14;	MED26|IDBG-35738|ENSG00000105085|9441|; PIK3R1|IDBG-25037|ENSG00000145675|5295|; PIK3R5|IDBG-29574|ENSG00000141506|23533|; PMVK|IDBG-102982|ENSG00000163344|10654|; RORA|IDBG-14920|ENSG00000069667|6095|; VAC14|IDBG-40481|ENSG00000103043|55697|;
Growth hormone signaling pathway	4113	PID BIOCARTA	9606	2	21	0.012310916628667744	0.3992254392439397	PIK3R1; PTPN6;	PIK3R1|IDBG-25037|ENSG00000145675|5295|; PTPN6|IDBG-15719|ENSG00000111679|5777|;
Signaling by ERBB4	13265	REACTOME	9606	2	137	0.30493	0.378246	PIK3R1; SKP1;	PIK3R1|IDBG-25037|ENSG00000145675|5295|; SKP1|IDBG-44621|ENSG00000113558|6500|;
Organelle biogenesis and maintenance	16766	REACTOME	9606	2	142	0.31989	0.394647	CAMK4; PTCD3;	CAMK4|IDBG-36661|ENSG00000152495|814|; PTCD3|IDBG-59626|ENSG00000132300|55037|;
Insulin signaling pathway	531	KEGG	9606	2	143	0.322874	0.396175	PIK3R1; PIK3R5;	PIK3R1|IDBG-25037|ENSG00000145675|5295|; PIK3R5|IDBG-29574|ENSG00000141506|23533|;
BCR	15916	NETPATH	9606	2	157	0.3642664198902913	0.4421843706689632	PIK3R1; PTPN6;	PIK3R1|IDBG-25037|ENSG00000145675|5295|; PTPN6|IDBG-15719|ENSG00000111679|5777|;
Downstream signaling events of B Cell Receptor (BCR)	19698	REACTOME	9606	2	155	0.358404	0.437407	PIK3R1; SKP1;	PIK3R1|IDBG-25037|ENSG00000145675|5295|; SKP1|IDBG-44621|ENSG00000113558|6500|;
TNFalpha	15913	NETPATH	9606	3	270	0.37465274049853475	0.44761143206930204	PIK3R1; PML; SKP1;	PIK3R1|IDBG-25037|ENSG00000145675|5295|; PML|IDBG-21462|ENSG00000140464|5371|; SKP1|IDBG-44621|ENSG00000113558|6500|;
Extracellular matrix organization	17095	REACTOME	9606	3	266	0.365777	0.441656	ADAMTS9; DCN; TNN;	ADAMTS9|IDBG-43120|ENSG00000163638|56999|; DCN|IDBG-50872|ENSG00000011465|1634|; TNN|IDBG-104971|ENSG00000120332|63923|;
Cystic fibrosis transmembrane conductance regulator (cftr) and beta 2 adrenergic receptor (b2ar) pathway	4007	PID BIOCARTA	9606	2	19	0.010129840851452698	0.45989477465595247	EZR; GNAS;	EZR|IDBG-98477|ENSG00000092820|7430|; GNAS|IDBG-82827|ENSG00000087460|2778|;
Disease	19807	REACTOME	9606	11	1192	0.37049	0.44498	CAMK4; DCN; PANK2; PDE1C; PDXK; PFKFB4; PIK3R1; RNF146; RNMT; SKP1; ZMYM2;	CAMK4|IDBG-36661|ENSG00000152495|814|; DCN|IDBG-50872|ENSG00000011465|1634|; PANK2|IDBG-49219|ENSG00000125779|80025|; PDE1C|IDBG-11559|ENSG00000154678|5137|; PDXK|IDBG-4833|ENSG00000160209|8566|; PFKFB4|IDBG-32970|ENSG00000114268|5210|; PIK3R1|IDBG-25037|ENSG00000145675|5295|; RNF146|IDBG-96179|ENSG00000118518|81847|; RNMT|IDBG-1256|ENSG00000101654|8731|; SKP1|IDBG-44621|ENSG00000113558|6500|; ZM…
Neuronal System	17312	REACTOME	9606	3	274	0.383507	0.455791	CAMK4; KCNJ12; NSF;	CAMK4|IDBG-36661|ENSG00000152495|814|; KCNJ12|IDBG-35680|ENSG00000184185|100996843,3768|; NSF|IDBG-55627|ENSG00000073969|101930324,4905|;
RNA transport	10361	KEGG	9606	2	170	0.401859	0.475115	EIF3C; FXR2;	EIF3C|IDBG-23122|ENSG00000184110|8663|; FXR2|IDBG-26108|ENSG00000129245|9513|;
Separation of Sister Chromatids	12942	REACTOME	9606	2	173	0.410393	0.482691	CDCA8; CLASP1;	CDCA8|IDBG-96468|ENSG00000134690|55143|; CLASP1|IDBG-68461|ENSG00000074054|23332|;
Fatty acid, triacylglycerol, and ketone body metabolism	13534	REACTOME	9606	2	176	0.41887	0.490121	MED26; RORA;	MED26|IDBG-35738|ENSG00000105085|9441|; RORA|IDBG-14920|ENSG00000069667|6095|;
Chemokine signaling pathway	4389	KEGG	9606	2	181	0.432863	0.501326	PIK3R1; PIK3R5;	PIK3R1|IDBG-25037|ENSG00000145675|5295|; PIK3R5|IDBG-29574|ENSG00000141506|23533|;
Mitotic Anaphase	18656	REACTOME	9606	2	181	0.432863	0.501326	CDCA8; CLASP1;	CDCA8|IDBG-96468|ENSG00000134690|55143|; CLASP1|IDBG-68461|ENSG00000074054|23332|;
Mitotic Metaphase and Anaphase	19900	REACTOME	9606	2	182	0.43564	0.501982	CDCA8; CLASP1;	CDCA8|IDBG-96468|ENSG00000134690|55143|; CLASP1|IDBG-68461|ENSG00000074054|23332|;
KitReceptor	15910	NETPATH	9606	4	104	0.009939573430736783	0.5640707921943124	EZR; PIK3R1; PTPN6; PTPRU;	EZR|IDBG-98477|ENSG00000092820|7430|; PIK3R1|IDBG-25037|ENSG00000145675|5295|; PTPN6|IDBG-15719|ENSG00000111679|5777|; PTPRU|IDBG-95340|ENSG00000060656|10076|;
G alpha (q) signalling events	13217	REACTOME	9606	2	186	0.446679	0.512102	NMU; PIK3R1;	NMU|IDBG-19638|ENSG00000109255|10874|; PIK3R1|IDBG-25037|ENSG00000145675|5295|;
Signaling by the B Cell Receptor (BCR)	19561	REACTOME	9606	2	188	0.452155	0.515774	PIK3R1; SKP1;	PIK3R1|IDBG-25037|ENSG00000145675|5295|; SKP1|IDBG-44621|ENSG00000113558|6500|;
Pathways in cancer	4397	KEGG	9606	3	329	0.501215	0.568879	PIK3R1; PIK3R5; PML;	PIK3R1|IDBG-25037|ENSG00000145675|5295|; PIK3R5|IDBG-29574|ENSG00000141506|23533|; PML|IDBG-21462|ENSG00000140464|5371|;
HIV Infection	19164	REACTOME	9606	2	209	0.507754	0.573434	RNMT; SKP1;	RNMT|IDBG-1256|ENSG00000101654|8731|; SKP1|IDBG-44621|ENSG00000113558|6500|;
Antigen processing: Ubiquitination & Proteasome degradation	12981	REACTOME	9606	2	212	0.515401	0.576335	SKP1; UBE2R2;	SKP1|IDBG-44621|ENSG00000113558|6500|; UBE2R2|IDBG-58571|ENSG00000107341|54926|;
Gastrin-CREB signalling pathway via PKC and MAPK	13219	REACTOME	9606	2	212	0.515401	0.576335	NMU; PIK3R1;	NMU|IDBG-19638|ENSG00000109255|10874|; PIK3R1|IDBG-25037|ENSG00000145675|5295|;
Axon guidance	17789	REACTOME	9606	3	336	0.515442	0.573555	CLASP1; EPHA3; EZR;	CLASP1|IDBG-68461|ENSG00000074054|23332|; EPHA3|IDBG-45928|ENSG00000044524|2042|; EZR|IDBG-98477|ENSG00000092820|7430|;
EPHA2 forward signaling	15662	PID NCI	9606	2	17	0.008141160844734634	0.6160145039182541	ACP1; PIK3R1;	ACP1|IDBG-25059|ENSG00000143727|52|; PIK3R1|IDBG-25037|ENSG00000145675|5295|;
Platelet activation, signaling and aggregation	17662	REACTOME	9606	2	219	0.532942	0.587271	PIK3R1; PIK3R5;	PIK3R1|IDBG-25037|ENSG00000145675|5295|; PIK3R5|IDBG-29574|ENSG00000141506|23533|;
Signaling by WNT in cancer	17000	REACTOME	9606	2	219	0.532942	0.587271	RNF146; SKP1;	RNF146|IDBG-96179|ENSG00000118518|81847|; SKP1|IDBG-44621|ENSG00000113558|6500|;
G alpha (i) signalling events	13220	REACTOME	9606	2	231	0.562013	0.616314	GNAS; NMU;	GNAS|IDBG-82827|ENSG00000087460|2778|; NMU|IDBG-19638|ENSG00000109255|10874|;
Cellular responses to stress	16723	REACTOME	9606	2	240	0.582972	0.636224	DNAJB1; RBBP7;	DNAJB1|IDBG-33491|ENSG00000132002|3337|; RBBP7|IDBG-47673|ENSG00000102054|5931|;
Hemostasis	19856	REACTOME	9606	4	508	0.595182	0.646441	GNAS; PIK3R1; PIK3R5; PTPN6;	GNAS|IDBG-82827|ENSG00000087460|2778|; PIK3R1|IDBG-25037|ENSG00000145675|5295|; PIK3R5|IDBG-29574|ENSG00000141506|23533|; PTPN6|IDBG-15719|ENSG00000111679|5777|;
Glycogen storage diseases	19851	REACTOME	9606	2	253	0.611952	0.652175	DCN; PFKFB4;	DCN|IDBG-50872|ENSG00000011465|1634|; PFKFB4|IDBG-32970|ENSG00000114268|5210|;
Metabolism of carbohydrates	17445	REACTOME	9606	2	253	0.611952	0.652175	DCN; PFKFB4;	DCN|IDBG-50872|ENSG00000011465|1634|; PFKFB4|IDBG-32970|ENSG00000114268|5210|;
Myoclonic epilepsy of Lafora	17077	REACTOME	9606	2	253	0.611952	0.652175	DCN; PFKFB4;	DCN|IDBG-50872|ENSG00000011465|1634|; PFKFB4|IDBG-32970|ENSG00000114268|5210|;
SLC-mediated transmembrane transport	19714	REACTOME	9606	2	253	0.611952	0.652175	RHCG; SLC11A2;	RHCG|IDBG-29352|ENSG00000140519|51458|; SLC11A2|IDBG-32924|ENSG00000110911|4891|;
Class I MHC mediated antigen processing & presentation	19282	REACTOME	9606	2	256	0.618423	0.65599	SKP1; UBE2R2;	SKP1|IDBG-44621|ENSG00000113558|6500|; UBE2R2|IDBG-58571|ENSG00000107341|54926|;
Cell Cycle	18205	REACTOME	9606	4	523	0.618496	0.653017	CDCA8; CLASP1; RBBP7; SKP1;	CDCA8|IDBG-96468|ENSG00000134690|55143|; CLASP1|IDBG-68461|ENSG00000074054|23332|; RBBP7|IDBG-47673|ENSG00000102054|5931|; SKP1|IDBG-44621|ENSG00000113558|6500|;
Cytokine-cytokine receptor interaction	515	KEGG	9606	2	258	0.622691	0.654402	LEP; TNFSF12;	LEP|IDBG-39587|ENSG00000174697|3952|; TNFSF12|IDBG-408330|ENSG00000239697|8742|;
Post-translational protein modification	17038	REACTOME	9606	2	262	0.631119	0.660202	ADAMTS9; PROZ;	ADAMTS9|IDBG-43120|ENSG00000163638|56999|; PROZ|IDBG-52386|ENSG00000126231|8858|;
M Phase	18628	REACTOME	9606	2	281	0.669188	0.696815	CDCA8; CLASP1;	CDCA8|IDBG-96468|ENSG00000134690|55143|; CLASP1|IDBG-68461|ENSG00000074054|23332|;
GPCR signaling	16218	INOH	9606	2	293	0.6915861622320889	0.7168495836834894	GNAS; LEP;	GNAS|IDBG-82827|ENSG00000087460|2778|; LEP|IDBG-39587|ENSG00000174697|3952|;
Signaling by Wnt	17272	REACTOME	9606	2	294	0.693396	0.715459	RNF146; SKP1;	RNF146|IDBG-96179|ENSG00000118518|81847|; SKP1|IDBG-44621|ENSG00000113558|6500|;
Cell Cycle, Mitotic	19119	REACTOME	9606	3	454	0.718764	0.738278	CDCA8; CLASP1; SKP1;	CDCA8|IDBG-96468|ENSG00000134690|55143|; CLASP1|IDBG-68461|ENSG00000074054|23332|; SKP1|IDBG-44621|ENSG00000113558|6500|;
Adaptive Immune System	18371	REACTOME	9606	4	604	0.729591	0.746024	PIK3R1; PTPN6; SKP1; UBE2R2;	PIK3R1|IDBG-25037|ENSG00000145675|5295|; PTPN6|IDBG-15719|ENSG00000111679|5777|; SKP1|IDBG-44621|ENSG00000113558|6500|; UBE2R2|IDBG-58571|ENSG00000107341|54926|;
Transmembrane transport of small molecules	16726	REACTOME	9606	4	606	0.732008	0.745139	GNAS; RHCG; SLC11A2; WNK2;	GNAS|IDBG-82827|ENSG00000087460|2778|; RHCG|IDBG-29352|ENSG00000140519|51458|; SLC11A2|IDBG-32924|ENSG00000110911|4891|; WNK2|IDBG-76524|ENSG00000165238|65268|;
Signaling by GPCR	17449	REACTOME	9606	6	1035	0.857347	0.868829	CAMK4; GNAS; NMU; PDE1C; PIK3R1; PIK3R5;	CAMK4|IDBG-36661|ENSG00000152495|814|; GNAS|IDBG-82827|ENSG00000087460|2778|; NMU|IDBG-19638|ENSG00000109255|10874|; PDE1C|IDBG-11559|ENSG00000154678|5137|; PIK3R1|IDBG-25037|ENSG00000145675|5295|; PIK3R5|IDBG-29574|ENSG00000141506|23533|;
GPCR ligand binding	19266	REACTOME	9606	2	433	0.871902	0.879652	GNAS; NMU;	GNAS|IDBG-82827|ENSG00000087460|2778|; NMU|IDBG-19638|ENSG00000109255|10874|;
Signal Transduction	17980	REACTOME	9606	12	1965	0.897	0.900969	CAMK4; GNAS; LEP; NMU; PCSK6; PDE1C; PIK3R1; PIK3R5; PTPN6; PTPRU; RNF146; SKP1;	CAMK4|IDBG-36661|ENSG00000152495|814|; GNAS|IDBG-82827|ENSG00000087460|2778|; LEP|IDBG-39587|ENSG00000174697|3952|; NMU|IDBG-19638|ENSG00000109255|10874|; PCSK6|IDBG-32449|ENSG00000140479|100507472,5046|; PDE1C|IDBG-11559|ENSG00000154678|5137|; PIK3R1|IDBG-25037|ENSG00000145675|5295|; PIK3R5|IDBG-29574|ENSG00000141506|23533|; PTPN6|IDBG-15719|ENSG00000111679|5777|; PTPRU|IDBG-95340|ENSG0000006065…
GPCR downstream signaling	18003	REACTOME	9606	4	923	0.949039	0.949039	GNAS; NMU; PIK3R1; PIK3R5;	GNAS|IDBG-82827|ENSG00000087460|2778|; NMU|IDBG-19638|ENSG00000109255|10874|; PIK3R1|IDBG-25037|ENSG00000145675|5295|; PIK3R5|IDBG-29574|ENSG00000141506|23533|;
