# Supplementary material for: Exploring the Limitations of Peripheral Blood Transcriptional Biomarkers in Predicting Influenza Vaccine Responsiveness
Source: Hindawi journal article supplement (doi:10.1155/2017/3017632), 2017-01-01
Supplement: f1 [file 3017632.f1.zip › Supplementary_File_S2.xlsx]

## Sheet: Biomarker
Biomarker length	12
Misclassified subjects (training set)	0
Misclassified subjects (validation set)	2	Low_Subject.39, High_Subject.35
Permutation test p-value (10000 trials)	0
Filtering statistical test	Wilcoxon
Threshold p-value	0.000156018
Probes	Gene symbol	Considered value	Log fold-change (High/Low responders)	Wilcoxon p-value
205432_at	OVGP1	day 3/day 0	-0.339891	0.000122856
221381_s_at	MORF4 /// MORF4L1	day 3/day 0	-0.368349	0.000122856
224194_at	FCRL2	day 3/day 0	0.325168	0.000122856
1563222_at		day 7/day 0	-0.431913	0.000122856
210424_s_at	GOLGA8A /// GOLGA8B	day 7/day 0	-0.860922	0.000122856
216699_s_at	KLK1	day 7/day 0	0.364937	0.000122856
221520_s_at	CDCA8	day 7/day 0	0.42671	0.000122856
234980_at	TMEM56	day 7/day 0	0.342378	0.000122856
238027_at	SPATA24	day 7/day 0	-0.362654	0.000122856
239117_at		day 7/day 0	0.268325	0.000122856
240854_x_at		day 7/day 0	0.289936	0.000122856
244309_at		day 7/day 0	-0.154633	0.000122856
