# Supplementary material for: Exploring the Limitations of Peripheral Blood Transcriptional Biomarkers in Predicting Influenza Vaccine Responsiveness
Source: Hindawi journal article supplement (doi:10.1155/2017/3017632), 2017-01-01
Supplement: f1 [file 3017632.f1.zip › Supplementary_File_S3.xlsx]

## Sheet: Sheet1
Gene	Day1.median.L	Day1.median.H	Day1.H.vs.L	Day1.p.value	Day1.fdr	Day3.median.L	Day3.median.H	Day3.H.vs.L	Day3.p.value	Day3.fdr	Day14.median.L	Day14.median.H	Day14.H.vs.L	Day14.p.value	Day14.fdr
LOC387686	-0.0317501	0.401057	0.432808	6.93608e-06	0.00528183	-0.200467	0.125827	0.326294	0.117927	0.841935	-0.0280651	0.18706	0.215125	0.0774362	0.485136
NOL10	-0.1494	0.302783	0.452182	3.4705e-06	0.00528183	-0.176088	0.0696807	0.245768	0.138203	0.841935	0.0382571	0.154567	0.116309	0.0576534	0.469552
LOC440313	-0.0854662	0.642504	0.72797	1.32853e-05	0.00674452	-0.167509	0.0869273	0.254437	0.108678	0.841935	0.0484399	0.444933	0.396493	0.0233228	0.39589
CAMK1G	-0.0269755	0.317732	0.344707	5.27817e-05	0.0160773	-0.1477	0.0965895	0.24429	0.0918579	0.841935	-0.153385	0.0114739	0.164859	0.00186009	0.39589
GPR175	-0.0264192	0.540357	0.566776	4.37982e-05	0.0160773	-0.0950042	0.201789	0.296794	0.214532	0.846944	0.0620637	0.219575	0.157511	0.0534075	0.459546
FAM116B	0.00732038	0.33941	0.33209	7.59139e-05	0.0192695	-0.154321	0.0148766	0.169198	0.214532	0.846944	-0.0281698	0.153457	0.181627	0.0669622	0.474341
CARM1	-0.168944	0.31385	0.482795	0.000178869	0.0194584	-0.0643438	0.0523883	0.116732	0.149269	0.842492	-0.0428791	0.208115	0.250994	0.0233228	0.39589
SELENBP1	-0.298791	0.377854	0.676644	0.000178869	0.0194584	-0.221115	-0.133579	0.0875369	0.377121	0.880912	-0.227847	0.140084	0.367931	0.0213265	0.39589
LOC645284	-0.0505025	0.258303	0.308805	0.000151538	0.0194584	-0.093913	0.0995329	0.193446	0.138203	0.841935	-0.00802462	0.130429	0.138454	0.0831389	0.485136
LOC648003	-0.0349793	0.125873	0.160852	0.000178869	0.0194584	-0.15031	0.0369773	0.187287	0.186379	0.846944	-0.0774085	0.0495871	0.126996	0.0213265	0.39589
GMPR	-0.0770289	0.473637	0.550666	0.000107871	0.0194584	-0.272467	0.0823656	0.354832	0.039657	0.814322	-0.262228	0.306895	0.569122	0.00111796	0.39589
DEK	0.248099	-0.285849	-0.533948	0.000107871	0.0194584	0.158345	-0.00607256	-0.164418	0.279439	0.864679	0.430189	0.295489	-0.1347	0.0891672	0.497442
GDI2	0.257336	-0.11258	-0.369916	0.000178869	0.0194584	0.0946035	-0.0117938	-0.106397	0.214532	0.846944	0.196484	0.0160516	-0.180433	0.00730998	0.39589
PKP2	-0.0230496	0.219416	0.242465	0.000151538	0.0194584	-0.0251417	0.00826967	0.0334114	0.377121	0.880912	-0.0755008	0.062532	0.138033	0.0233228	0.39589
SERPINA13	-0.145583	0.544682	0.690265	0.000210585	0.0200451	-0.120167	0.151951	0.272118	0.160975	0.842492	-0.148734	0.304411	0.453145	0.0161821	0.39589
MFSD1	0.218158	-0.178928	-0.397086	0.000210585	0.0200451	0.206802	-0.0466484	-0.25345	0.00258255	0.393322	0.273961	0.0913274	-0.182634	0.180088	0.589837
LOC648526	-0.00960527	0.153881	0.163487	0.000247276	0.0209223	-0.0167998	0.0112297	0.0280295	0.356113	0.880912	-0.0816611	0.0470879	0.128749	0.0121354	0.39589
SAT1	0.311693	-0.0390855	-0.350778	0.000247276	0.0209223	0.228001	-0.0925828	-0.320584	0.058612	0.841935	0.327591	0.0524418	-0.275149	0.049419	0.450689
GYPB	-0.137288	0.193953	0.331242	0.000289643	0.021006	-0.189031	-0.0286375	0.160393	0.398851	0.886789	0.0063114	0.144143	0.137832	0.0955325	0.505194
TESC	-0.179807	0.290799	0.470606	0.000289643	0.021006	-0.152509	0.0786363	0.231145	0.0918579	0.841935	-0.193709	0.13947	0.333179	0.0621678	0.474341
LOC284422	-0.00384546	0.226979	0.230824	0.000289643	0.021006	-0.0141732	0.162005	0.176178	0.117927	0.841935	-0.00706726	0.0919495	0.0990167	0.109319	0.512285
PHLDB1	-0.0641088	0.269968	0.334077	0.000394491	0.0231081	-0.0880929	0.100257	0.18835	0.297499	0.864679	-0.211944	0.0106862	0.222631	0.0388865	0.43989
AHSP	-0.318796	0.332459	0.651255	0.000394491	0.0231081	-0.306853	-0.0212402	0.285613	0.138203	0.841935	-0.0397522	0.167984	0.207737	0.102246	0.512239
ZNF786	-0.263801	0.15331	0.417111	0.000394491	0.0231081	-0.0218161	-0.0413769	-0.0195608	0.492781	0.927696	-0.162662	0.0428627	0.205524	0.0421693	0.43989
LOC647742	0.00438414	0.224507	0.220122	0.000394491	0.0231081	-0.0671485	-0.0261791	0.0409694	0.492781	0.927696	-0.0538072	0.0150734	0.0688806	0.213737	0.618861
CD55	0.20395	-0.347561	-0.551511	0.000394491	0.0231081	-0.000536198	-0.137256	-0.13672	0.0771358	0.841935	0.138997	0.0579098	-0.081087	0.202063	0.604601
PELI1	0.306258	-0.176719	-0.482976	0.000458753	0.0240924	0.087937	-0.0550963	-0.143033	0.297499	0.864679	0.11526	0.340272	0.225012	0.974738	0.995658
CMTM6	0.136951	-0.176954	-0.313904	0.000458753	0.0240924	-0.00825109	-0.144809	-0.136558	0.335838	0.874328	0.155763	0.0118981	-0.143865	0.324223	0.714605
HS.571622	-0.00219095	0.273819	0.27601	0.000458753	0.0240924	-0.235831	0.0297505	0.265582	0.0918579	0.841935	-0.158529	0.0768292	0.235358	0.0177645	0.39589
LIPA	0.363751	-0.00300534	-0.366757	0.00053228	0.0253332	0.244747	0.0425789	-0.202169	0.070508	0.841935	0.1757	-0.00761444	-0.183314	0.0388865	0.43989
KRT1	-0.0369237	0.382957	0.419881	0.00053228	0.0253332	-0.301029	0.0349218	0.335951	0.0643409	0.841935	0.000350718	0.158335	0.157984	0.0233228	0.39589
FLJ41423	-0.0941843	0.126493	0.220677	0.00053228	0.0253332	-0.0616211	0.029285	0.0909061	0.117927	0.841935	-0.100647	0.0405428	0.141189	0.0358174	0.43989
NDUFS7	-0.0935403	0.108007	0.201547	0.000616192	0.0260684	0.0454178	0.0927165	0.0472986	0.279439	0.864679	-0.0736636	-0.0475965	0.0260671	0.505237	0.815988
RBM38	-0.319382	0.103386	0.422768	0.000616192	0.0260684	-0.341241	0.0834907	0.424732	0.0233421	0.725511	-0.512227	-0.0178135	0.494414	0.0358174	0.43989
BSG	-0.0273997	0.20964	0.237039	0.000616192	0.0260684	-0.0864922	0.0365977	0.12309	0.160975	0.842492	-0.165542	0.0304944	0.196037	0.00186009	0.39589
Selenoprotein 15	0.155678	-0.332244	-0.487922	0.000616192	0.0260684	0.0773969	0.0454065	-0.0319904	0.492781	0.927696	0.139788	-0.0541161	-0.193904	0.0774362	0.485136
CCDC52	-0.0769898	0.224555	0.301545	0.000711787	0.0271013	-0.116257	0.136834	0.25309	0.138203	0.841935	-0.129346	0.252514	0.381859	0.00210335	0.39589
MBNL1	0.100469	-0.111946	-0.212415	0.000711787	0.0271013	0.123553	0.0377912	-0.085762	0.316299	0.874271	0.211044	0.113138	-0.0979054	0.190849	0.599306
DOCK11	0.247221	-0.269577	-0.516798	0.000711787	0.0271013	0.187062	0.0648934	-0.122169	0.279439	0.864679	0.407126	0.282924	-0.124201	0.37362	0.733278
ELOVL5	0.237877	-0.240621	-0.478499	0.000711787	0.0271013	0.132379	-0.165367	-0.297745	0.0186261	0.69189	0.391903	-0.0160125	-0.407915	0.00590932	0.39589
PRDX5	-0.208677	0.0839342	0.292611	0.000820426	0.0304758	0.0183772	0.0921416	0.0737644	0.200105	0.846944	-0.0466397	-0.0213372	0.0253025	0.356674	0.722359
LPCAT1	-0.160833	0.0697964	0.230629	0.00094368	0.0319383	-0.101099	-0.0305878	0.0705117	0.214532	0.846944	-0.0716006	-0.056221	0.0153795	0.293709	0.683974
FXR2	-0.10205	0.158038	0.260088	0.00094368	0.0319383	-0.0435513	-0.0195373	0.024014	0.468278	0.920241	-0.0530615	0.00268709	0.0557486	0.356674	0.722359
GP9	-0.105479	0.187001	0.292481	0.00094368	0.0319383	-0.133805	0.00199125	0.135796	0.149269	0.842492	0.0398367	0.0829261	0.0430894	0.150446	0.571395
MOSPD3	-0.0474878	0.116335	0.163823	0.00094368	0.0319383	-0.0354397	0.00339466	0.0388344	0.377121	0.880912	-0.096746	-0.0162227	0.0805233	0.0831389	0.485136
RAXL1	-0.108576	0.130494	0.23907	0.00108319	0.0320301	-0.0821081	-0.105835	-0.0237265	0.829677	0.981817	-0.235652	-0.109485	0.126166	0.159895	0.571642
PCMT1	0.129787	-0.143495	-0.273282	0.00124082	0.0320301	0.108837	0.107931	-0.000906349	0.829677	0.981817	0.396946	0.267336	-0.12961	0.190849	0.599306
LOC152578	-0.00336651	0.173642	0.177009	0.00124082	0.0320301	-0.0935892	0.108698	0.202287	0.138203	0.841935	-0.0865652	0.0739879	0.160553	0.0421693	0.43989
SLC10A3	-0.0871885	0.0258403	0.113029	0.00124082	0.0320301	-0.101229	-0.0282928	0.0729364	0.492781	0.927696	-0.116371	-0.0521506	0.06422	0.0669622	0.474341
CDC34	-0.268099	0.0783054	0.346405	0.00108319	0.0320301	-0.192946	0.0973323	0.290278	0.127763	0.841935	-0.342865	-0.0200061	0.322859	0.0254742	0.39589
HTR2A	0.0717567	-0.182633	-0.254389	0.00124082	0.0320301	0.124647	0.0349381	-0.0897089	0.214532	0.846944	0.11229	0.031756	-0.0805336	0.180088	0.589837
TMEM123	0.419309	-0.186966	-0.606274	0.00124082	0.0320301	0.252018	0.0187195	-0.233298	0.149269	0.842492	0.38161	0.421087	0.0394774	0.703774	0.899201
TMEM205	-0.106336	0.143937	0.250273	0.00108319	0.0320301	-0.0437006	0.0706832	0.114384	0.0771358	0.841935	-0.165288	0.0672351	0.232523	0.0534075	0.459546
SET	0.280778	-0.0754692	-0.356247	0.00108319	0.0320301	0.134695	-0.0381276	-0.172823	0.160975	0.842492	0.248629	0.0940033	-0.154626	0.102246	0.512239
MAFB	0.75632	0.21649	-0.53983	0.00124082	0.0320301	0.499177	0.095209	-0.403968	0.00693677	0.586928	0.218551	0.270988	0.0524368	0.924313	0.978949
ZFAND5	0.296822	-0.257938	-0.55476	0.00124082	0.0320301	0.411537	0.0405809	-0.370956	0.0322649	0.805565	0.454824	0.265553	-0.189271	0.180088	0.589837
DPYSL5	0.0437648	0.414911	0.371147	0.00124082	0.0320301	-0.119644	0.211277	0.330922	0.117927	0.841935	-0.21671	0.167592	0.384302	0.00530138	0.39589
SLC6A8	-0.0245817	0.317121	0.341703	0.00124082	0.0320301	-0.157173	-0.0211253	0.136048	0.200105	0.846944	-0.203989	0.0867266	0.290716	0.0456765	0.450689
HS.143018	-0.183453	0.1117	0.295153	0.00124082	0.0320301	-0.284063	0.101059	0.385122	0.043844	0.814322	-0.369745	-0.150437	0.219308	0.0254742	0.39589
TBC1D10B	-0.0318867	0.291245	0.323131	0.00141856	0.0322457	-0.0889756	-0.00563549	0.0833401	0.468278	0.920241	-0.10698	0.0173915	0.124371	0.225876	0.627753
KPNB1	0.365007	0.0121294	-0.352878	0.00141856	0.0322457	0.0650093	-0.0660716	-0.131081	0.517936	0.931623	0.243487	0.154368	-0.08912	0.546771	0.838603
TMEM87A	0.23952	-0.132915	-0.372435	0.00141856	0.0322457	0.346344	0.104987	-0.241357	0.279439	0.864679	0.300609	0.236769	-0.0638392	0.213737	0.618861
SLC31A2	0.237905	-0.105514	-0.343419	0.00141856	0.0322457	-0.0846961	-0.219481	-0.134785	0.099995	0.841935	-0.0443049	-0.163346	-0.119041	0.169772	0.581041
VWCE	-0.11053	0.398858	0.509388	0.00141856	0.0322457	-0.0832121	0.167968	0.25118	0.160975	0.842492	-0.219483	0.20305	0.422533	0.0302791	0.411742
SPRYD3	-0.0826876	0.419778	0.502465	0.00141856	0.0322457	-0.102514	0.165601	0.268116	0.316299	0.874271	-0.00234008	0.242179	0.244519	0.0358174	0.43989
SAMD9	0.313676	-0.00638382	-0.32006	0.00141856	0.0322457	0.200295	-0.0379005	-0.238196	0.108678	0.841935	0.302178	0.214118	-0.0880604	0.308723	0.699681
HS.137971	0.0999873	-0.300927	-0.400915	0.00141856	0.0322457	0.0987889	-0.0350964	-0.133885	0.262117	0.864679	0.121513	0.0553888	-0.0661239	0.169772	0.581041
LOC347292	-0.210894	-0.0718031	0.139091	0.00161861	0.0337691	-0.0813161	-0.0216879	0.0596282	0.517936	0.931623	-0.132173	-0.0985055	0.0336675	0.611998	0.865435
PDSS2	-0.103299	0.139819	0.243118	0.00161861	0.0337691	-0.0404608	0.0427952	0.083256	0.570107	0.931623	-0.167897	0.104503	0.2724	0.0147214	0.39589
HBZ	-0.0302669	0.172454	0.202721	0.00161861	0.0337691	-0.0317362	0.00200167	0.0337379	0.297499	0.864679	-0.010911	0.0399215	0.0508325	0.141418	0.569788
RNF213	-0.0449112	0.239481	0.284392	0.00161861	0.0337691	-0.0134715	0.0145669	0.0280384	0.279439	0.864679	-0.150771	0.121702	0.272473	0.0121354	0.39589
NINJ2	-0.0393466	0.232381	0.271728	0.00161861	0.0337691	-0.126506	0.114056	0.240561	0.117927	0.841935	-0.0669773	0.248554	0.315532	0.0302791	0.411742
RNF114	0.3527	0.0556524	-0.297047	0.00161861	0.0337691	0.260499	-0.0573977	-0.317896	0.00258255	0.393322	0.118278	-0.0298329	-0.148111	0.0302791	0.411742
HBQ1	-0.0789385	0.19317	0.272108	0.00184332	0.0364594	-0.0119713	0.145404	0.157375	0.297499	0.864679	0.040168	0.22791	0.187742	0.109319	0.512285
ZNF787	0.0242871	0.17524	0.150953	0.00184332	0.0364594	-0.0850481	0.0632694	0.148317	0.356113	0.880912	-0.12612	0.0759671	0.202087	0.00530138	0.39589
IGJ	0.109608	-0.188182	-0.29779	0.00184332	0.0364594	0.072397	-0.0802747	-0.152672	0.279439	0.864679	0.0680267	-0.0877163	-0.155743	0.049419	0.450689
ZFP36L2	0.16455	-0.211773	-0.376323	0.00184332	0.0364594	0.159008	0.0588912	-0.100116	0.245529	0.851802	0.131907	-0.00512606	-0.137033	0.727457	0.902948
PDZK1IP1	-0.162177	0.301057	0.463234	0.0020953	0.0398893	-0.0859677	0.1005	0.186468	0.070508	0.841935	-0.0145351	0.0147682	0.0293033	0.308723	0.699681
HDGF	-0.0283177	0.19744	0.225757	0.0020953	0.0398893	-0.0929958	-0.0323002	0.0606955	0.297499	0.864679	-0.255359	-0.0378929	0.217466	0.102246	0.512239
OBFC2A	0.247117	-0.201783	-0.4489	0.0020953	0.0398893	0.181242	-0.0501482	-0.23139	0.0643409	0.841935	0.203349	0.107448	-0.0959005	0.190849	0.599306
GBP1	1.0706	0.437576	-0.633029	0.00237729	0.0421002	0.343683	-0.108905	-0.452588	0.000155636	0.0580846	0.08691	-0.0235588	-0.110469	0.0720478	0.485136
LOC651763	0.0204442	0.256059	0.235615	0.00237729	0.0421002	-0.0851506	-0.0227486	0.0624019	0.398851	0.886789	-0.122053	0.155519	0.277572	0.0177645	0.39589
PCMTD1	0.0985431	-0.20654	-0.305083	0.00237729	0.0421002	0.148836	-0.0413301	-0.190166	0.17334	0.846944	0.426691	0.240146	-0.186545	0.159895	0.571642
DTWD2	-0.161207	0.0145789	0.175786	0.00237729	0.0421002	-0.0283073	-0.0530775	-0.0247702	0.922122	0.992503	-0.152214	-0.0104338	0.14178	0.0534075	0.459546
TMED4	-0.203505	0.0197461	0.223251	0.00237729	0.0421002	-0.0184545	0.0218249	0.0402794	0.398851	0.886789	-0.216497	-0.164263	0.0522338	0.446115	0.772962
ACTRT1	-0.0990061	0.143149	0.242155	0.00237729	0.0421002	0.00960481	0.0391006	0.0294958	0.543719	0.931623	-0.168107	0.0761091	0.244216	0.00657725	0.39589
SLC38A2	0.163444	-0.128943	-0.292387	0.00269237	0.0436221	0.0999753	0.0210602	-0.078915	0.468278	0.920241	0.249063	0.205175	-0.0438884	1	1
LOC643665	-0.0573466	0.121424	0.178771	0.00269237	0.0436221	-0.0384318	-0.075182	-0.0367502	0.799303	0.976213	-0.0613016	-0.00907667	0.052225	0.0576534	0.469552
WSB1	0.15208	-0.0573628	-0.209443	0.00269237	0.0436221	0.0594146	-0.011054	-0.0704686	0.22967	0.846944	0.0621014	0.0369502	-0.0251512	0.611998	0.865435
PGLYRP1	-0.248781	0.192146	0.440926	0.00269237	0.0436221	-0.314339	-0.158736	0.155603	0.710093	0.971673	-0.453852	-0.331719	0.122133	0.308723	0.699681
OXR1	0.0838961	-0.233331	-0.317227	0.00269237	0.0436221	0.105863	0.138893	0.0330299	0.214532	0.846944	0.395526	0.3186	-0.0769257	0.340207	0.722359
PUF60	-0.0961957	0.146535	0.242731	0.00269237	0.0436221	0.000646122	0.0754129	0.0747668	0.0643409	0.841935	-0.101641	0.0796941	0.181336	0.213737	0.618861
FAM49B	0.0915024	-0.119466	-0.210969	0.00269237	0.0436221	-0.0423357	-0.0945784	-0.0522427	0.160975	0.842492	0.15614	-0.000523384	-0.156664	0.00237439	0.39589
HS.544245	-0.00477526	0.304888	0.309664	0.00269237	0.0436221	-0.191835	0.0964317	0.288267	0.127763	0.841935	-0.0296266	0.260703	0.29033	0.0213265	0.39589
MAP2K2	-0.244299	0.162601	0.4069	0.00304373	0.0441485	-0.0245928	0.062023	0.0866158	0.279439	0.864679	-0.206319	-0.168084	0.0382356	0.356674	0.722359
C1ORF43	0.0786256	-0.0298551	-0.108481	0.00304373	0.0441485	-0.0204723	-0.00035319	0.0201191	0.652614	0.950221	0.00618078	-0.0360086	-0.0421893	0.0891672	0.497442
BTK	0.136901	-0.0788748	-0.215776	0.00304373	0.0441485	0.10736	0.0420446	-0.0653158	0.0771358	0.841935	0.15937	-0.0543892	-0.21376	0.0388865	0.43989
IL10	-0.0932598	0.000402392	0.0936622	0.00304373	0.0441485	0.101648	0.00501957	-0.0966285	0.398851	0.886789	-0.0499917	0.110421	0.160413	0.0955325	0.505194
MYL4	-0.130821	0.135945	0.266766	0.00304373	0.0441485	-0.104257	0.133517	0.237774	0.356113	0.880912	-0.0456575	0.152727	0.198384	0.0621678	0.474341
STX11	0.482637	0.0715215	-0.411116	0.00304373	0.0441485	-0.104325	-0.31722	-0.212896	0.0358042	0.814322	0.110413	0.0226337	-0.0877794	0.568138	0.848307
TSPAN33	-0.0510486	0.131591	0.18264	0.00304373	0.0441485	-0.130486	0.0459707	0.176456	0.0918579	0.841935	-0.133406	0.175599	0.309005	0.0121354	0.39589
ALDOC	-0.121876	0.0306092	0.152486	0.00304373	0.0441485	-0.013808	0.0797055	0.0935135	0.262117	0.864679	-0.0394332	0.0900309	0.129464	0.0388865	0.43989
RUNDC3A	-0.0397604	0.229144	0.268904	0.00304373	0.0441485	-0.153458	0.0402787	0.193737	0.214532	0.846944	-0.203235	0.0711237	0.274359	0.0302791	0.411742
RNASEH2C	-0.0701304	0.101997	0.172127	0.00304373	0.0441485	-0.0445265	0.00559196	0.0501185	0.214532	0.846944	-0.0272737	0.0709656	0.0982394	0.049419	0.450689
C1ORF128	-0.322647	0.172074	0.494721	0.00304373	0.0441485	-0.315904	-0.140524	0.17538	0.17334	0.846944	-0.0955341	0.22116	0.316694	0.0213265	0.39589
RSAD2	0.504362	0.0589136	-0.445448	0.00343492	0.047558	0.221318	-0.0485841	-0.269902	9.08808e-06	0.0138411	0.0282334	-0.0414962	-0.0697296	0.141418	0.569788
C12ORF35	0.211546	-0.12302	-0.334566	0.00343492	0.047558	0.00813924	-0.0693094	-0.0774486	0.421297	0.90244	0.131499	0.258519	0.127021	0.949501	0.984405
MORF4L1	0.0666931	-0.0569632	-0.123656	0.00343492	0.047558	0.0497587	-0.0116564	-0.061415	0.444443	0.91595	0.0806134	0.0391318	-0.0414816	0.141418	0.569788
RTF1	-0.00987894	0.364182	0.374061	0.00343492	0.047558	-0.146568	0.077509	0.224077	0.279439	0.864679	-0.044633	0.0994614	0.144094	0.0277899	0.411742
HMHA1	-0.196383	0.288921	0.485304	0.00343492	0.047558	-0.103918	0.0995153	0.203433	0.00606879	0.586928	-0.184936	0.0902985	0.275235	0.0109959	0.39589
GNG10	0.118764	-0.0550381	-0.173802	0.00386965	0.0499447	0.13556	-0.0719413	-0.207501	0.22967	0.846944	0.279382	0.104241	-0.175142	0.116762	0.523025
CTSB	0.0915033	0.348283	0.25678	0.00386965	0.0499447	-0.0650507	0.0785891	0.14364	0.0260523	0.734772	-0.185475	0.180526	0.366001	0.000857284	0.39589
FCGR3A	-0.0179033	0.0961776	0.114081	0.00386965	0.0499447	-0.123754	0.0127756	0.136529	0.262117	0.864679	-0.101995	0.0864049	0.1884	0.0774362	0.485136
ALAS2	-0.0546256	0.206981	0.261606	0.00386965	0.0499447	-0.104678	0.0652398	0.169918	0.377121	0.880912	-0.0669158	0.20337	0.270286	0.00424743	0.39589
EIF4A1	0.144215	-0.0268699	-0.171085	0.00386965	0.0499447	0.178585	0.0683202	-0.110265	0.108678	0.841935	0.0736752	-0.0936625	-0.167338	0.102246	0.512239
STX10	-0.182007	0.0410012	0.223009	0.00386965	0.0499447	-0.145231	-0.0688335	0.0763973	0.68113	0.958743	-0.184057	-0.13628	0.0477779	1	1
MCOLN1	-0.130695	0.27164	0.402335	0.00386965	0.0499447	-0.055506	0.085877	0.141383	0.200105	0.846944	-0.204471	0.00769751	0.212168	0.049419	0.450689
TMEM86B	-0.158372	0.189571	0.347944	0.00386965	0.0499447	-0.14252	0.077858	0.220378	0.138203	0.841935	-0.375307	-0.0424168	0.332891	0.0329517	0.428935
GNL3L	-0.123136	0.22743	0.350565	0.00435201	0.0530249	-0.243764	-0.0269285	0.216836	0.0483847	0.818777	-0.354112	-0.0544937	0.299618	0.049419	0.450689
SFT2D1	0.282599	-0.0456421	-0.328241	0.00435201	0.0530249	0.13096	-0.060035	-0.190995	0.043844	0.814322	0.128062	0.00495511	-0.123107	0.0669622	0.474341
RAB3IL1	-0.0204401	0.242893	0.263333	0.00435201	0.0530249	0.0174001	0.0508146	0.0334145	0.468278	0.920241	-0.080488	0.0804266	0.160915	0.0233228	0.39589
OSTF1	0.168281	-0.0207187	-0.189	0.00435201	0.0530249	0.00310123	-0.0396097	-0.042711	0.860302	0.985143	0.0316504	-0.0868467	-0.118497	0.109319	0.512285
SSR1	0.145298	-0.204614	-0.349912	0.00435201	0.0530249	0.100848	-0.0723966	-0.173244	0.200105	0.846944	0.181223	0.0163183	-0.164904	0.446115	0.772962
GCA	0.16907	-0.254965	-0.424035	0.00435201	0.0530249	0.0872862	-0.279594	-0.366881	0.070508	0.841935	0.125388	0.0725859	-0.0528021	0.899199	0.967831
HBD	-0.185542	0.281949	0.46749	0.00435201	0.0530249	-0.288852	-0.0232739	0.265578	0.0918579	0.841935	0.00669639	0.179518	0.172822	0.589885	0.862183
TMEM137	-0.132002	0.0842459	0.216248	0.00488626	0.0547189	-0.124063	0.105788	0.229851	0.039657	0.814322	0.0254094	0.058565	0.0331557	0.546771	0.838603
HSD17B11	0.0759025	-0.0722576	-0.14816	0.00488626	0.0547189	-0.0794682	-0.163153	-0.0836845	0.117927	0.841935	0.0435374	0.0309002	-0.0126371	0.611998	0.865435
LOC728565	-0.172242	-0.0245619	0.14768	0.00488626	0.0547189	-0.0874133	0.0384047	0.125818	0.0208721	0.706403	-0.0271017	-0.0372954	-0.0101937	1	1
PJA2	0.219006	-0.257291	-0.476297	0.00488626	0.0547189	0.103862	-0.00950945	-0.113372	0.138203	0.841935	0.244329	0.334698	0.0903691	0.949501	0.984405
FAM45A	0.0656631	-0.109799	-0.175462	0.00488626	0.0547189	-0.0140694	-0.0091138	0.00495556	0.543719	0.931623	0.181002	0.0435013	-0.137501	0.265134	0.667436
SDHD	0.157523	-0.12324	-0.280763	0.00488626	0.0547189	0.0763709	0.00621884	-0.0701521	0.22967	0.846944	0.138788	-0.028438	-0.167226	0.0302791	0.411742
TDRD7	0.255797	0.120765	-0.135032	0.00488626	0.0547189	0.177409	0.0312025	-0.146207	0.039657	0.814322	0.19717	0.153918	-0.0432529	0.657257	0.88978
LOC652140	-0.083238	0.370296	0.453534	0.00488626	0.0547189	-0.0847674	0.122316	0.207083	0.492781	0.927696	-0.139905	0.0860688	0.225974	0.150446	0.571395
CHRAC1	0.0450102	0.125766	0.0807553	0.00488626	0.0547189	0.0449324	0.0152879	-0.0296445	0.769219	0.976213	-0.0757825	-0.00807843	0.067704	0.25157	0.658318
RAP1GAP	-0.0911223	0.114465	0.205587	0.00488626	0.0547189	-0.0724182	-0.0149175	0.0575007	0.984401	1	-0.00840308	0.119867	0.12827	0.190849	0.599306
RAB22A	0.121545	-0.0621236	-0.183669	0.00488626	0.0547189	-0.0346062	-0.00341721	0.031189	0.597071	0.93843	-0.015855	0.0777429	0.093598	0.340207	0.722359
FIS1	-0.120376	0.107411	0.227787	0.00547708	0.0567455	0.0198368	0.00742937	-0.0124074	0.597071	0.93843	-0.0568811	-0.0553374	0.00154368	0.356674	0.722359
ELF1	0.267231	-0.0863574	-0.353589	0.00547708	0.0567455	0.244814	0.163285	-0.0815281	0.245529	0.851802	0.197616	0.161154	-0.036462	0.568138	0.848307
GIMAP2	0.106845	-0.0182521	-0.125097	0.00547708	0.0567455	0.0797952	0.028994	-0.0508012	0.421297	0.90244	0.14984	0.0681442	-0.0816953	0.169772	0.581041
RNF10	-0.0927651	0.243471	0.336236	0.00547708	0.0567455	-0.163382	0.00112435	0.164506	0.200105	0.846944	-0.271148	0.0837649	0.354913	0.00811266	0.39589
LOC400948	-0.177525	0.138309	0.315835	0.00547708	0.0567455	0.00725692	-0.0480934	-0.0553504	0.953226	0.997776	-0.0366228	-0.00428955	0.0323333	0.899199	0.967831
RPL13L	-0.0974011	-0.0329871	0.0644139	0.00547708	0.0567455	-0.0712409	0.0623533	0.133594	0.039657	0.814322	-0.034783	-0.00581179	0.0289712	0.634461	0.876846
EOMES	-0.1978	-0.0232303	0.17457	0.00547708	0.0567455	-0.0305694	0.0667323	0.0973017	0.214532	0.846944	-0.0315463	0.0716717	0.103218	0.0669622	0.474341
FAM119A	-0.179253	0.0209624	0.200216	0.00547708	0.0567455	-0.102799	0.0115431	0.114342	0.0533007	0.841935	-0.15553	-0.149703	0.00582682	0.568138	0.848307
HIST1H2AC	0.0431108	-0.211687	-0.254797	0.00547708	0.0567455	-0.0347527	-0.11647	-0.0817176	0.543719	0.931623	0.139577	0.0585365	-0.0810405	0.727457	0.902948
HS.163752	-0.188309	0.0608763	0.249185	0.00547708	0.0567455	-0.0604521	-0.110772	-0.0503195	0.953226	0.997776	-0.186781	-0.0841184	0.102663	0.141418	0.569788
IMP4	-0.045382	0.118334	0.163716	0.00547708	0.0567455	-0.076519	0.218185	0.294704	0.0290208	0.736645	-0.0590699	0.0663354	0.125405	0.141418	0.569788
PRKRIR	0.155123	-0.42362	-0.578743	0.0061293	0.0610126	0.21546	0.0600065	-0.155454	0.138203	0.841935	0.314502	0.292671	-0.0218314	0.427297	0.763818
UBXN6	-0.234126	0.151503	0.385629	0.0061293	0.0610126	-0.0710385	-0.12698	-0.055941	0.492781	0.927696	-0.110151	0.0383562	0.148508	0.25157	0.658318
LEPROTL1	-0.00539296	-0.369128	-0.363735	0.0061293	0.0610126	0.323298	-0.155996	-0.479295	0.149269	0.842492	0.33527	0.0984493	-0.236821	0.265134	0.667436
AP1S2	0.337518	-0.24075	-0.578267	0.0061293	0.0610126	0.254076	-0.204921	-0.458997	0.138203	0.841935	0.472238	0.20359	-0.268648	0.0576534	0.469552
WBP1	-0.0718909	0.0471832	0.119074	0.0061293	0.0610126	-0.0657183	-0.00786274	0.0578556	0.421297	0.90244	-0.00596442	0.0183435	0.0243079	1	1
TMEM91	-0.14292	0.110258	0.253177	0.0061293	0.0610126	-0.0528256	0.0528057	0.105631	0.214532	0.846944	-0.0910181	0.0947099	0.185728	0.150446	0.571395
SCAP	-0.275681	0.0357185	0.311399	0.00684824	0.0651867	-0.18691	0.0188595	0.205769	0.138203	0.841935	-0.153444	0.0211516	0.174596	0.0233228	0.39589
PIK3R2	-0.107005	0.191894	0.298898	0.00684824	0.0651867	-0.122792	0.0860008	0.208793	0.0233421	0.725511	-0.069658	0.0245719	0.0942299	0.0576534	0.469552
C16ORF35	-0.0299716	0.231517	0.261489	0.00684824	0.0651867	-0.100899	0.0290234	0.129923	0.377121	0.880912	-0.161247	0.00296358	0.164211	0.0621678	0.474341
NOP58	0.100475	-0.0891205	-0.189596	0.00684824	0.0651867	0.0588283	-0.108231	-0.16706	0.200105	0.846944	0.0371554	-0.058151	-0.0953064	0.238485	0.647439
E2F2	-0.119315	0.507842	0.627157	0.00684824	0.0651867	-0.0784607	0.0475656	0.126026	0.127763	0.841935	-0.130674	0.339814	0.470489	0.0302791	0.411742
WDR40A	-0.139863	0.234461	0.374324	0.00684824	0.0651867	-0.104254	0.158267	0.26252	0.17334	0.846944	0.00265162	0.345751	0.3431	0.0388865	0.43989
RHBDD2	-0.0693029	0.139347	0.20865	0.00684824	0.0651867	0.113663	-0.129078	-0.242741	0.891131	0.988487	-0.145741	-0.129482	0.0162586	0.611998	0.865435
FOS	0.269808	-0.0675422	-0.33735	0.00763937	0.0680395	0.0684202	-0.0252657	-0.0936859	0.297499	0.864679	0.110616	0.00378446	-0.106832	0.874183	0.96198
SEPHS2	0.179781	-0.00213024	-0.181911	0.00763937	0.0680395	0.0233157	-0.0446447	-0.0679604	0.200105	0.846944	0.00670176	0.00646387	-0.000237886	0.391043	0.746314
FGL2	0.586696	0.0644138	-0.522282	0.00763937	0.0680395	0.215725	-0.197162	-0.412886	0.0290208	0.736645	0.228762	-0.174848	-0.40361	0.0891672	0.497442
HERC5	0.992968	0.463261	-0.529706	0.00763937	0.0680395	0.453579	-0.0635544	-0.517133	5.26354e-05	0.0400819	-0.0162579	-0.0891926	-0.0729346	0.238485	0.647439
LOC100008589	0.0367938	0.299083	0.262289	0.00763937	0.0680395	-0.135743	0.181557	0.3173	0.186379	0.846944	-0.0969032	0.348326	0.445229	0.0955325	0.505194
TRAM1	0.0688135	-0.243526	-0.31234	0.00763937	0.0680395	0.200376	-0.131579	-0.331955	0.127763	0.841935	0.372217	0.303307	-0.0689094	0.265134	0.667436
FPR2	0.221611	-0.094705	-0.316316	0.00763937	0.0680395	-0.0578692	-0.240794	-0.182925	0.517936	0.931623	-0.00196881	0.0510438	0.0530126	0.634461	0.876846
IFI44	0.385712	0.00118588	-0.384526	0.00763937	0.0680395	0.29168	0.0501364	-0.241544	0.0186261	0.69189	0.156735	-0.00193064	-0.158666	0.132801	0.55872
LDHA	0.122931	-0.173189	-0.296119	0.00763937	0.0680395	0.20202	0.0604643	-0.141555	0.0918579	0.841935	0.119794	-0.114144	-0.233938	0.0194766	0.39589
SNX10	0.261131	-0.101252	-0.362384	0.00763937	0.0680395	0.0513777	-0.113122	-0.1645	0.468278	0.920241	0.15111	0.185101	0.0339913	0.899199	0.967831
ADIPOR2	-0.0646944	0.0494577	0.114152	0.00763937	0.0680395	-0.0467684	0.0635783	0.110347	0.043844	0.814322	-0.169404	-0.077047	0.0923575	0.0774362	0.485136
LMBRD1	0.0173698	-0.265313	-0.282683	0.00850867	0.0704278	-0.0122892	-0.0685936	-0.0563044	0.186379	0.846944	0.401264	0.182077	-0.219186	0.141418	0.569788
CHIC2	0.0842474	-0.124869	-0.209117	0.00850867	0.0704278	0.1137	-0.114368	-0.228068	0.0918579	0.841935	0.118345	-0.00133786	-0.119683	0.141418	0.569788
CPVL	0.286932	0.0631065	-0.223826	0.00850867	0.0704278	0.260672	-0.0805573	-0.341229	0.00899896	0.622974	0.0834144	0.000776446	-0.082638	0.0720478	0.485136
ST6GALNAC4	-0.0289363	0.0663601	0.0952964	0.00850867	0.0704278	-0.0808842	-0.012167	0.0687172	0.245529	0.851802	-0.0801557	0.0096425	0.0897982	0.265134	0.667436
TBC1D10C	-0.365819	-0.0580478	0.307772	0.00850867	0.0704278	-0.0308315	0.0256087	0.0564402	0.597071	0.93843	-0.187649	-0.138078	0.0495712	0.611998	0.865435
FAM46C	-0.23738	0.0677045	0.305085	0.00850867	0.0704278	-0.390505	-0.0174246	0.373081	0.117927	0.841935	-0.147773	0.50525	0.653023	0.0254742	0.39589
CDA	-0.313343	0.0367059	0.350049	0.00850867	0.0704278	-0.289371	-0.185829	0.103542	0.73947	0.97592	-0.239447	-0.101655	0.137792	0.169772	0.581041
GIMAP4	0.275957	0.0912905	-0.184667	0.00850867	0.0704278	0.15867	0.0764744	-0.082196	0.297499	0.864679	0.193234	0.284352	0.0911181	0.727457	0.902948
SLC7A7	0.326483	0.0778435	-0.24864	0.00850867	0.0704278	0.189455	-0.048373	-0.237828	0.043844	0.814322	-0.0184902	-0.0695599	-0.0510697	0.611998	0.865435
FLVCR2	0.192295	0.0165573	-0.175738	0.00850867	0.0704278	0.0346804	0.0214926	-0.0131878	0.356113	0.880912	0.0836554	0.0248322	-0.0588232	0.79996	0.93074
ASNSD1	0.213226	-0.107196	-0.320422	0.00850867	0.0704278	0.174983	-0.0591434	-0.234126	0.492781	0.927696	0.36875	0.113541	-0.255208	0.0831389	0.485136
FLJ44124	-0.455373	0.0485132	0.503886	0.00850867	0.0704278	-0.165048	-0.0564893	0.108558	0.624584	0.950221	-0.251281	-0.0328081	0.218472	0.0774362	0.485136
EPSTI1	1.38689	0.691366	-0.695522	0.00850867	0.0704278	0.467817	-0.0933702	-0.561187	0.000341961	0.086801	0.220002	-0.121751	-0.341753	0.049419	0.450689
CALM2	0.12254	-0.128616	-0.251156	0.00946228	0.0746687	0.110401	-0.00828652	-0.118687	0.377121	0.880912	0.268729	0.134053	-0.134676	0.340207	0.722359
VEZF1	0.110779	-0.0719037	-0.182682	0.00946228	0.0746687	0.22695	0.106406	-0.120544	0.297499	0.864679	0.148083	0.215489	0.067406	0.465384	0.787534
SERINC1	0.0347242	-0.12447	-0.159194	0.00946228	0.0746687	0.0259559	-0.0538996	-0.0798555	0.335838	0.874328	0.132919	0.0895849	-0.0433338	0.775571	0.918503
C1ORF63	0.113699	-0.075769	-0.189468	0.00946228	0.0746687	0.0472697	-0.11121	-0.158479	0.200105	0.846944	0.204934	0.119001	-0.0859333	0.159895	0.571642
RNASE6	-0.268119	-0.0736334	0.194485	0.00946228	0.0746687	-0.141914	-0.109109	0.0328049	0.279439	0.864679	-0.0331316	0.0367782	0.0699098	0.408937	0.756757
OSBP2	0.0236758	0.13276	0.109084	0.00946228	0.0746687	-0.196156	0.00892052	0.205077	0.108678	0.841935	-0.0615169	0.152508	0.214025	0.0421693	0.43989
SRXN1	-0.177138	-0.0184008	0.158737	0.00946228	0.0746687	-0.149086	0.0381929	0.187279	0.17334	0.846944	-0.169726	0.0419507	0.211677	0.00267591	0.39589
HS.153349	-0.0348283	0.0616038	0.096432	0.00946228	0.0746687	0.00375965	0.0198006	0.016041	0.769219	0.976213	-0.0874631	0.065433	0.152896	0.0213265	0.39589
LYL1	-0.128213	0.264948	0.393161	0.00946228	0.0746687	-0.11737	0.0242316	0.141602	0.138203	0.841935	-0.0294099	0.149782	0.179191	0.0774362	0.485136
HBE1	-0.072637	0.152124	0.224761	0.0105069	0.0796118	-0.249884	0.0694582	0.319342	0.17334	0.846944	-0.0468175	0.0495033	0.0963208	0.25157	0.658318
TMBIM4	0.0593926	-0.114814	-0.174207	0.0105069	0.0796118	0.142318	-0.0507781	-0.193096	0.652614	0.950221	0.240746	0.139626	-0.10112	0.169772	0.581041
DNAJA1	0.555426	-0.00909906	-0.564525	0.0105069	0.0796118	0.131142	0.121661	-0.0094808	0.73947	0.97592	0.170264	0.13493	-0.035334	0.680367	0.896366
PTEN	0.167114	-0.12686	-0.293973	0.0105069	0.0796118	0.0844109	-0.0379532	-0.122364	0.039657	0.814322	0.106175	0.0701125	-0.0360624	0.408937	0.756757
March 7	0.0464102	-0.287955	-0.334365	0.0105069	0.0796118	0.0141089	0.106788	0.0926794	0.421297	0.90244	0.290629	0.400903	0.110274	1	1
RAP2C	0.0535593	-0.0843209	-0.13788	0.0105069	0.0796118	0.084197	0.00693118	-0.0772658	0.624584	0.950221	0.150879	-0.0307279	-0.181607	0.0831389	0.485136
ATP6V1G1	0.282067	-0.0371604	-0.319228	0.0105069	0.0796118	0.339045	-0.0716657	-0.41071	0.0771358	0.841935	0.523522	0.175589	-0.347933	0.0233228	0.39589
C22ORF25	-0.184816	0.195401	0.380217	0.0105069	0.0796118	-0.0615928	-0.0404703	0.0211225	0.829677	0.981817	-0.394355	0.0124836	0.406839	0.0109959	0.39589
IFIT1	0.417361	0.142005	-0.275357	0.0116493	0.0832952	0.309868	-0.0718514	-0.38172	0.000706804	0.134558	0.0674229	-0.080696	-0.148119	0.150446	0.571395
VPREB3	-0.112393	0.0353069	0.1477	0.0116493	0.0832952	-0.150598	-0.223647	-0.073049	0.68113	0.958743	-0.051818	-0.0478276	0.00399042	0.751397	0.91331
AATF	-0.0500294	0.104359	0.154389	0.0116493	0.0832952	-0.0786871	-0.0359085	0.0427787	0.214532	0.846944	-0.181729	-0.104968	0.0767606	0.116762	0.523025
YPEL5	0.0100801	-0.352172	-0.362252	0.0116493	0.0832952	0.113777	-0.0630132	-0.17679	0.138203	0.841935	0.250452	0.0182271	-0.232225	0.238485	0.647439
EML4	-0.00884852	-0.109978	-0.101129	0.0116493	0.0832952	0.0818486	0.127719	0.0458701	0.769219	0.976213	0.0882825	0.0435882	-0.0446943	0.169772	0.581041
C22ORF30	0.00197283	0.219669	0.217696	0.0116493	0.0832952	-0.151795	0.193091	0.344885	0.316299	0.874271	-0.144077	0.0769432	0.22102	0.0621678	0.474341
ARGLU1	-0.0423809	-0.308165	-0.265784	0.0116493	0.0832952	0.169829	0.154619	-0.0152102	0.297499	0.864679	0.566184	0.377028	-0.189156	0.109319	0.512285
SERF2	-0.120157	0.150439	0.270596	0.0116493	0.0832952	0.0517221	0.0752228	0.0235007	0.398851	0.886789	0.024296	0.202572	0.178276	0.505237	0.815988
SFRS1	0.172651	-0.20845	-0.381102	0.0116493	0.0832952	0.225573	0.124308	-0.101266	0.138203	0.841935	0.141584	0.122231	-0.0193533	0.391043	0.746314
TSPAN5	-0.0800467	0.0657442	0.145791	0.0116493	0.0832952	-0.223366	0.0184966	0.241862	0.0483847	0.818777	-0.118342	0.164032	0.282375	0.0277899	0.411742
LOC652968	-0.0370953	0.200566	0.237662	0.0116493	0.0832952	0.0297985	0.0196939	-0.0101046	0.652614	0.950221	-0.0942912	-0.0200691	0.0742221	0.180088	0.589837
SRP14P1	0.0920343	-0.0951551	-0.187189	0.0116493	0.0832952	0.129867	0.0848203	-0.0450467	0.517936	0.931623	0.166625	-0.00402198	-0.170647	0.0421693	0.43989
RAB31	0.137789	-0.0465763	-0.184365	0.0128969	0.0905162	-0.0446738	-0.129846	-0.0851725	0.186379	0.846944	-0.0039079	0.145549	0.149457	0.356674	0.722359
VNN2	0.0356963	-0.174954	-0.21065	0.0128969	0.0905162	0.0523364	-0.246951	-0.299288	0.0918579	0.841935	0.127973	0.0470486	-0.0809243	0.27918	0.670647
PARP9	0.610384	0.223912	-0.386472	0.0128969	0.0905162	0.0171317	-0.118213	-0.135345	0.070508	0.841935	0.0865509	-0.0210097	-0.107561	0.340207	0.722359
KIAA0664	-0.031175	0.10607	0.137245	0.0128969	0.0905162	-0.0335692	0.022717	0.0562862	0.200105	0.846944	-0.10508	0.0062709	0.111351	0.0456765	0.450689
LOC653635	-0.145676	0.157013	0.302689	0.0142573	0.0956559	-0.119075	0.146667	0.265741	0.356113	0.880912	-0.23232	0.0484983	0.280818	0.0831389	0.485136
ARL16	-0.0910517	0.0463274	0.137379	0.0142573	0.0956559	-0.0176204	-0.0328968	-0.0152765	0.829677	0.981817	-0.0847685	-0.110427	-0.0256582	0.949501	0.984405
STAT1	1.26396	0.758117	-0.505846	0.0142573	0.0956559	0.082543	-0.0334407	-0.115984	0.127763	0.841935	-0.200944	-0.0667335	0.134211	0.634461	0.876846
ZNF557	-0.111996	0.0262627	0.138259	0.0142573	0.0956559	-0.0135402	-0.02009	-0.00654988	0.829677	0.981817	-0.0880356	-0.0375892	0.0504465	0.150446	0.571395
SUMO3	0.0630316	-0.0319136	-0.0949452	0.0142573	0.0956559	0.131234	0.0705902	-0.0606435	0.517936	0.931623	0.170701	0.0236066	-0.147094	0.0421693	0.43989
EIF1AY	0.0419168	-0.0709164	-0.112833	0.0142573	0.0956559	0.0803031	-0.0566981	-0.137001	0.377121	0.880912	0.174214	0.0646415	-0.109573	0.356674	0.722359
RSBN1	0.107755	-0.239557	-0.347312	0.0142573	0.0956559	0.171415	0.0805334	-0.0908816	0.444443	0.91595	0.28114	0.174007	-0.107133	0.751397	0.91331
LYZ	0.271814	0.0254075	-0.246406	0.0142573	0.0956559	0.144453	-0.00726163	-0.151715	0.214532	0.846944	0.224795	0.138219	-0.086576	0.324223	0.714605
SH3GLB2	-0.231871	0.0617634	0.293635	0.0142573	0.0956559	-0.02478	-0.139188	-0.114408	0.984401	1	-0.14458	-0.182029	-0.0374484	0.634461	0.876846
HNRPA2B1	0.161663	-0.0736963	-0.23536	0.0142573	0.0956559	0.237647	0.0417903	-0.195856	0.186379	0.846944	0.271693	-0.0104996	-0.282193	0.0133749	0.39589
TMEM71	0.0677965	-0.395621	-0.463417	0.0157386	0.100293	-0.0271531	-0.254288	-0.227134	0.108678	0.841935	0.184537	0.167367	-0.0171693	0.727457	0.902948
CA4	-0.310197	0.10143	0.411628	0.0157386	0.100293	-0.272012	-0.230011	0.0420003	0.316299	0.874271	-0.177984	-0.0802283	0.0977562	0.225876	0.627753
IFI16	0.335806	0.14253	-0.193276	0.0157386	0.100293	0.163242	-0.11223	-0.275472	0.0208721	0.706403	0.111494	-0.0515401	-0.163034	0.150446	0.571395
NARS	0.145666	-0.0284483	-0.174114	0.0157386	0.100293	0.0106834	0.0846945	0.0740111	0.829677	0.981817	0.300286	0.0959486	-0.204338	0.0233228	0.39589
NMI	0.315715	0.044302	-0.271413	0.0157386	0.100293	0.248916	-0.181079	-0.429994	0.00606879	0.586928	0.121278	-0.0343751	-0.155653	0.0720478	0.485136
TUBA4A	-0.113465	0.148583	0.262048	0.0157386	0.100293	-0.166623	-0.0210535	0.145569	0.22967	0.846944	-0.0850417	0.0569603	0.142002	0.159895	0.571642
DENND5A	0.280756	-0.0565165	-0.337273	0.0157386	0.100293	-0.079203	-0.126722	-0.0475185	0.186379	0.846944	0.011656	-0.0194444	-0.0311004	0.974738	0.995658
MLPH	-0.0185819	0.0884428	0.107025	0.0157386	0.100293	-0.0320127	0.0350284	0.067041	0.444443	0.91595	-0.0112843	-0.012645	-0.00136069	0.680367	0.896366
C21ORF55	-0.038501	0.126819	0.16532	0.0157386	0.100293	-0.0632858	0.0737178	0.137004	0.624584	0.950221	-0.0270149	0.155339	0.182354	0.049419	0.450689
HS.149244	-0.0867532	0.0761159	0.162869	0.0157386	0.100293	-0.0290919	0.000776335	0.0298683	0.769219	0.976213	-0.194145	-0.0616796	0.132465	0.109319	0.512285
ANXA1	0.0662649	-0.512917	-0.579182	0.0157386	0.100293	0.251069	-0.198544	-0.449613	0.127763	0.841935	0.535555	0.02255	-0.513005	0.0233228	0.39589
ACTR2	0.225847	-0.184722	-0.410569	0.0157386	0.100293	0.107443	0.113988	0.00654455	0.829677	0.981817	0.254875	0.188757	-0.0661185	0.680367	0.896366
HECTD1	0.0325224	-0.170249	-0.202772	0.0173491	0.105691	0.0969348	0.0313264	-0.0656084	0.22967	0.846944	0.154185	0.0431197	-0.111066	0.27918	0.670647
MPP1	-0.0642941	0.207996	0.27229	0.0173491	0.105691	-0.210915	0.0580943	0.269009	0.149269	0.842492	-0.130609	0.0668519	0.197461	0.0456765	0.450689
NCBP1	0.0534203	0.00792502	-0.0454953	0.0173491	0.105691	0.121258	-0.0234556	-0.144713	0.127763	0.841935	0.226615	0.0189394	-0.207675	0.0121354	0.39589
DUSP1	0.344911	-0.125101	-0.470012	0.0173491	0.105691	0.0727698	0.0419977	-0.0307721	0.262117	0.864679	-0.0420604	-0.0197502	0.0223102	0.611998	0.865435
CD7	-0.265243	-0.00938164	0.255862	0.0173491	0.105691	-0.204629	0.151509	0.356138	0.0147414	0.660328	-0.0941428	-0.0128813	0.0812615	0.505237	0.815988
C17ORF71	0.0475354	-0.0349024	-0.0824377	0.0173491	0.105691	0.0491437	-0.0454111	-0.0945548	0.0115684	0.642255	0.0056016	-0.0085394	-0.014141	0.505237	0.815988
PCNP	0.105169	-0.188487	-0.293656	0.0173491	0.105691	0.0845108	-0.100265	-0.184775	0.138203	0.841935	0.37058	0.140146	-0.230435	0.124586	0.542127
RNF219	0.0387063	-0.052202	-0.0909084	0.0173491	0.105691	0.0469793	0.00139004	-0.0455893	0.377121	0.880912	0.128897	-0.0103344	-0.139232	0.0133749	0.39589
XRCC5	0.017405	-0.122728	-0.140133	0.0173491	0.105691	-0.0865573	0.0576633	0.144221	0.543719	0.931623	-0.041228	-0.0450588	-0.00383085	0.899199	0.967831
PIP5K2A	-0.101667	0.26228	0.363947	0.0173491	0.105691	-0.0906905	0.197913	0.288604	0.108678	0.841935	-0.142692	0.215174	0.357866	0.00994975	0.39589
ZNF652	-0.0386672	0.0728557	0.111523	0.0173491	0.105691	-0.0536567	-0.0389627	0.014694	0.186379	0.846944	-0.145193	0.07214	0.217333	0.0621678	0.474341
MAP2K1IP1	0.114797	-0.0940376	-0.208835	0.0190976	0.111868	0.119431	0.142345	0.022914	0.543719	0.931623	0.424888	0.206992	-0.217896	0.0621678	0.474341
FLJ46309	-0.129421	0.0330446	0.162466	0.0190976	0.111868	-0.00555555	-0.0160116	-0.0104561	0.468278	0.920241	-0.058354	-0.0488166	0.00953736	0.37362	0.733278
PPT1	0.209728	-0.0767911	-0.286519	0.0190976	0.111868	0.104679	-0.0441164	-0.148796	0.297499	0.864679	0.153001	0.125809	-0.0271924	0.924313	0.978949
IFNGR1	-0.00794481	-0.246857	-0.238912	0.0190976	0.111868	0.220013	-0.0439385	-0.263952	0.0842449	0.841935	0.49177	0.32526	-0.166511	0.25157	0.658318
LCN2	-0.236929	0.0978136	0.334743	0.0190976	0.111868	-0.326766	-0.114896	0.21187	0.0290208	0.736645	-0.29369	-0.175274	0.118415	0.408937	0.756757
LOC644063	0.177043	-0.0156658	-0.192709	0.0190976	0.111868	0.0388385	0.0279856	-0.0108529	0.570107	0.931623	0.0922578	0.0312712	-0.0609867	0.505237	0.815988
IFIT2	0.790594	0.378876	-0.411718	0.0190976	0.111868	0.216832	-0.00498557	-0.221818	0.0165874	0.682773	0.467809	0.278566	-0.189242	0.546771	0.838603
TRIM22	0.633364	0.210586	-0.422778	0.0190976	0.111868	0.256061	0.0325297	-0.223531	0.0208721	0.706403	0.171039	-0.0263865	-0.197426	0.150446	0.571395
ACTR1A	-0.0717123	0.078941	0.150653	0.0190976	0.111868	-0.110062	0.0995119	0.209574	0.0130728	0.642255	-0.0466171	0.0602833	0.1069	0.0456765	0.450689
HS.554324	-0.439531	-0.177662	0.261869	0.0190976	0.111868	-0.00773249	0.182928	0.19066	0.0483847	0.818777	0.0210894	0.0376239	0.0165345	0.79996	0.93074
CA1	-0.173078	0.181809	0.354887	0.0209932	0.119301	-0.212879	0.0872558	0.300135	0.214532	0.846944	0.0824645	0.196211	0.113746	0.180088	0.589837
ZNF683	-0.105298	0.0406498	0.145948	0.0209932	0.119301	-0.0325765	0.0730635	0.10564	0.186379	0.846944	-0.140252	-0.0162234	0.124029	0.27918	0.670647
WASF2	-0.184187	0.132763	0.316949	0.0209932	0.119301	-0.192794	0.0160289	0.208823	0.0115684	0.642255	-0.23122	-0.265368	-0.0341478	0.391043	0.746314
FEM1A	0.00534312	0.116192	0.110848	0.0209932	0.119301	-0.112931	0.0476496	0.16058	0.0290208	0.736645	-0.196567	0.103147	0.299714	0.00657725	0.39589
LOC642377	-0.01148	0.155926	0.167406	0.0209932	0.119301	0.0419535	0.0382403	-0.00371318	0.799303	0.976213	-0.00798795	0.0459606	0.0539486	0.505237	0.815988
TMEM66	0.108352	-0.288517	-0.39687	0.0205131	0.119301	0.116026	-0.0119206	-0.127947	0.444443	0.91595	0.154225	0.108878	-0.0453461	0.25157	0.658318
TAX1BP1	0.148946	-0.0731679	-0.222114	0.0209932	0.119301	0.193323	-0.0259309	-0.219254	0.377121	0.880912	0.411711	0.244493	-0.167218	0.265134	0.667436
FAM115A	-0.0987492	-0.000871108	0.0978781	0.0209932	0.119301	-0.0633749	-0.0543471	0.00902771	0.953226	0.997776	-0.144737	-0.0197536	0.124983	0.0621678	0.474341
MX1	1.21216	0.379836	-0.832327	0.0230454	0.124905	0.369167	0.0650907	-0.304076	0.00693677	0.586928	-0.0856463	-0.127131	-0.041485	0.5258	0.830699
WRNIP1	0.016382	-0.0804685	-0.0968505	0.0230454	0.124905	0.102556	0.0323683	-0.0701876	0.138203	0.841935	0.133019	0.0583346	-0.0746843	0.0421693	0.43989
ELOF1	-0.0642005	0.0353303	0.0995308	0.0230454	0.124905	-0.0894948	-0.0313179	0.0581769	0.0771358	0.841935	-0.156307	-0.0331121	0.123195	0.225876	0.627753
MRPL16	0.0908198	-0.0905251	-0.181345	0.0230454	0.124905	-0.006015	-0.0487512	-0.0427362	0.860302	0.985143	0.0166317	-0.0659194	-0.0825511	0.202063	0.604601
EIF2AK4	-0.12728	0.112859	0.240139	0.0230454	0.124905	-0.154803	-0.123016	0.031787	0.73947	0.97592	-0.205674	-0.0231265	0.182548	0.0388865	0.43989
GUK1	-0.153811	0.136769	0.29058	0.0230454	0.124905	-0.112528	0.00500194	0.11753	0.214532	0.846944	-0.0526799	0.066503	0.119183	0.265134	0.667436
IFIT1L	-0.0302638	0.212252	0.242516	0.0230454	0.124905	-0.131331	0.0919902	0.223322	0.377121	0.880912	0.0160288	0.174884	0.158856	0.109319	0.512285
IL18	-0.203091	0.0752945	0.278385	0.0230454	0.124905	-0.166621	-0.0809515	0.0856692	0.335838	0.874328	-0.184772	0.0748079	0.25958	0.049419	0.450689
C16ORF63	0.0677296	-0.20022	-0.26795	0.0230454	0.124905	0.0844518	-0.00844347	-0.0928953	0.160975	0.842492	0.200805	0.168783	-0.0320222	0.0891672	0.497442
TNFSF10	0.417909	0.120144	-0.297765	0.0230454	0.124905	0.0659285	-0.132842	-0.198771	0.17334	0.846944	0.115794	-0.0854658	-0.20126	0.25157	0.658318
ZNF394	-0.179543	-0.0206096	0.158933	0.0230454	0.124905	-0.082269	-0.0835924	-0.00132335	0.953226	0.997776	-0.191848	-0.177523	0.0143251	0.485095	0.803917
MTDH	0.0400828	-0.0983654	-0.138448	0.0230454	0.124905	-0.0596244	0.00156074	0.0611852	0.891131	0.988487	0.1215	0.0804603	-0.0410396	0.546771	0.838603
C14ORF85	-0.266912	-0.0701946	0.196717	0.0230454	0.124905	-0.321035	-0.173367	0.147668	0.517936	0.931623	-0.114056	-0.260775	-0.146719	0.974738	0.995658
NCOA4	0.249372	-0.0980296	-0.347402	0.0234009	0.126381	0.0519657	-0.0111043	-0.06307	0.543719	0.931623	0.16697	0.252995	0.0860251	0.727457	0.902948
PTPRCAP	-0.192434	-0.00239503	0.190039	0.025264	0.129552	-0.0901571	0.100561	0.190718	0.214532	0.846944	-0.0151693	-0.023329	-0.00815968	0.974738	0.995658
GAPT	0.158798	-0.0844877	-0.243286	0.025264	0.129552	0.167038	0.00810542	-0.158933	0.279439	0.864679	0.340768	0.0831583	-0.25761	0.0669622	0.474341
BCYRN1	-0.11699	0.0635672	0.180558	0.025264	0.129552	-0.0143731	-0.0887405	-0.0743675	0.922122	0.992503	-0.0694985	-0.0501159	0.0193826	0.611998	0.865435
CEBPB	0.0605028	-0.0681387	-0.128641	0.025264	0.129552	0.0730562	-0.21011	-0.283166	0.0147414	0.660328	-0.103211	0.0381552	0.141366	0.589885	0.862183
HDHD2	0.0476347	-0.0409621	-0.0885968	0.025264	0.129552	0.0706618	-0.0274916	-0.0981534	0.377121	0.880912	0.108184	-0.00358126	-0.111766	0.408937	0.756757
SH2D1A	0.0176729	-0.171329	-0.189002	0.025264	0.129552	0.201807	-0.000293412	-0.2021	0.160975	0.842492	0.245369	0.0988489	-0.146521	0.00379309	0.39589
IRF1	0.627754	0.298634	-0.32912	0.025264	0.129552	0.012674	-0.242495	-0.255169	0.149269	0.842492	-0.151502	-0.149171	0.00233047	0.751397	0.91331
GGNBP2	0.102144	-0.0788132	-0.180958	0.025264	0.129552	0.0691669	0.0575725	-0.0115944	0.398851	0.886789	0.187275	0.101874	-0.0854008	0.408937	0.756757
CHST13	-0.195359	0.0423789	0.237738	0.025264	0.129552	-0.0602586	0.0691434	0.129402	0.00899896	0.622974	-0.107651	0.0651672	0.172818	0.0421693	0.43989
ARHGDIA	-0.00115857	0.0999173	0.101076	0.025264	0.129552	-0.0449407	0.0318203	0.076761	0.377121	0.880912	-0.274328	-0.0586956	0.215633	0.225876	0.627753
SMU1	0.0307288	-0.047281	-0.0780098	0.025264	0.129552	0.0397358	0.0155865	-0.0241493	0.597071	0.93843	-0.0315695	-0.00443054	0.0271389	0.849289	0.952479
SACM1L	0.0773818	-0.110375	-0.187757	0.025264	0.129552	0.111966	0.0550613	-0.0569048	0.68113	0.958743	0.223763	0.152586	-0.0711771	0.546771	0.838603
GBP2	1.00865	0.467439	-0.541216	0.025264	0.129552	0.148779	0.0416463	-0.107133	0.0771358	0.841935	0.0660019	-0.093674	-0.159676	0.680367	0.896366
PIM1	-0.077075	0.19862	0.275694	0.025264	0.129552	-0.203001	-0.0267441	0.176257	0.099995	0.841935	-0.215601	0.0173729	0.232973	0.0109959	0.39589
KIR3DL2	0.0234656	0.178189	0.154723	0.025264	0.129552	-0.0657396	-0.0320022	0.0337374	0.769219	0.976213	-0.167633	-0.00624589	0.161388	0.0955325	0.505194
NAMPT	0.103457	-0.0864444	-0.189902	0.0276592	0.134585	-0.075628	-0.269216	-0.193588	0.22967	0.846944	0.0412133	0.0405385	-0.000674766	0.727457	0.902948
CALM3	-0.0596712	0.168162	0.227833	0.0276592	0.134585	-0.0941169	0.0776167	0.171734	0.117927	0.841935	-0.100951	0.19255	0.293501	0.37362	0.733278
LOC652839	-0.0778442	0.00921613	0.0870604	0.0276592	0.134585	-0.00751881	-0.0226413	-0.0151225	0.860302	0.985143	-0.00679249	0.0211224	0.0279149	0.408937	0.756757
CST7	-0.382879	-0.0390931	0.343786	0.0276592	0.134585	-0.24807	-0.175018	0.0730519	0.652614	0.950221	-0.145161	-0.101688	0.0434734	0.949501	0.984405
ETS1	0.2028	-0.187736	-0.390536	0.0276592	0.134585	0.306544	0.271251	-0.0352929	0.597071	0.93843	0.42891	0.288805	-0.140105	0.589885	0.862183
TMX1	0.158511	-0.134795	-0.293306	0.0276592	0.134585	0.177311	-0.131037	-0.308348	0.335838	0.874328	0.372485	0.19768	-0.174805	0.293709	0.683974
NFS1	-0.102885	-0.0137112	0.0891741	0.0276592	0.134585	-0.0252957	0.0507117	0.0760074	0.0260523	0.734772	-0.00218329	-0.015294	-0.0131107	0.79996	0.93074
EIF3A	0.100196	-0.0290475	-0.129243	0.0276592	0.134585	0.0828023	0.13346	0.0506576	1	1	0.114744	0.0814865	-0.0332574	0.751397	0.91331
NFE2	-0.0433724	0.239749	0.283121	0.0276592	0.134585	-0.17808	-0.063013	0.115067	0.160975	0.842492	-0.188663	0.19278	0.381443	0.00474884	0.39589
CALR	0	0.116561	0.116561	0.0276592	0.134585	-0.0521927	-0.00059676	0.0515959	0.398851	0.886789	-0.127374	-0.0328165	0.0945575	0.0421693	0.43989
PSCDBP	0.0396297	-0.0889078	-0.128538	0.0276592	0.134585	-0.0202687	-0.0024999	0.0177688	0.769219	0.976213	0.0542712	0.0689535	0.0146824	0.568138	0.848307
LOC388588	-0.15104	0.17864	0.32968	0.0276592	0.134585	0.172631	-0.0110087	-0.183639	0.829677	0.981817	-0.0826551	0.0381912	0.120846	0.356674	0.722359
ZNF526	-0.115513	-0.00471663	0.110796	0.0276592	0.134585	-0.00926094	-0.00167011	0.00759083	0.73947	0.97592	-0.0724741	-0.0610434	0.0114307	0.427297	0.763818
AHSA2	0.0948208	-0.0827395	-0.17756	0.0276592	0.134585	0.0776574	0.0314537	-0.0462036	0.279439	0.864679	0.107406	-0.0519463	-0.159352	0.0109959	0.39589
HSPC268	-0.117966	4.59424e-05	0.118012	0.0276592	0.134585	-0.127141	-0.0652971	0.0618436	0.597071	0.93843	-0.171184	-0.128984	0.0422002	0.680367	0.896366
CRIPAK	-0.129952	-0.00185833	0.128093	0.0276592	0.134585	-0.0842928	-0.00917398	0.0751188	0.099995	0.841935	-0.219589	-0.0884605	0.131129	0.0669622	0.474341
IKZF1	-0.0879133	0.104401	0.192314	0.0302415	0.142154	-0.20561	-0.0993414	0.106269	0.0771358	0.841935	-0.206007	-0.0684156	0.137591	0.0161821	0.39589
DUSP6	0.194473	0.0431911	-0.151282	0.0302415	0.142154	-0.0218734	-0.0887858	-0.0669124	0.316299	0.874271	0.00934721	-0.0478653	-0.0572125	0.751397	0.91331
EIF4A2	0.0544855	-0.472828	-0.527313	0.0302415	0.142154	0.212136	0.123579	-0.0885573	0.356113	0.880912	0.333299	0.396833	0.0635346	0.37362	0.733278
TMEM49	0.146637	-0.166027	-0.312664	0.0302415	0.142154	-0.105227	-0.211813	-0.106586	0.492781	0.927696	0.242288	0.107586	-0.134702	0.568138	0.848307
PPP4R1	0.0705696	-0.109649	-0.180218	0.0302415	0.142154	0.0968012	-0.179398	-0.2762	0.000706804	0.134558	0.039677	-0.0649698	-0.104647	0.5258	0.830699
HLA-DMB	0.398882	0.23222	-0.166662	0.0302415	0.142154	0.268087	0.11207	-0.156017	0.070508	0.841935	0.132438	0.120858	-0.0115796	0.775571	0.918503
IFNGR2	0.169971	0.0779269	-0.0920446	0.0302415	0.142154	-0.00444143	-0.0348162	-0.0303747	0.543719	0.931623	0.0643518	0.0530455	-0.0113063	0.899199	0.967831
IL13RA1	0.323806	0.0238682	-0.299938	0.0302415	0.142154	0.0212097	0.0082693	-0.0129404	0.710093	0.971673	0.0797984	0.0815699	0.00177154	0.634461	0.876846
PIK3CG	-0.117839	0.0986368	0.216476	0.0302415	0.142154	-0.063628	-0.00313377	0.0604942	0.160975	0.842492	-0.154372	0.0137753	0.168148	0.0194766	0.39589
CHURC1	0.148951	-0.160377	-0.309328	0.0302415	0.142154	0.0367534	-0.00818876	-0.0449421	0.68113	0.958743	0.255368	0.087829	-0.167539	0.169772	0.581041
CHD8	-0.0976862	0.0941504	0.191837	0.0302415	0.142154	-0.127738	0.139948	0.267687	0.200105	0.846944	-0.127157	-0.0811119	0.0460454	0.190849	0.599306
CLEC12A	0.161461	-0.0329262	-0.194387	0.0330217	0.151482	0.0735025	-0.0184437	-0.0919462	0.138203	0.841935	0.129212	0.0101019	-0.11911	0.0254742	0.39589
ALPP	-0.146043	0.0521642	0.198207	0.0330217	0.151482	0.00413977	-0.124673	-0.128813	0.597071	0.93843	-0.199143	-0.235025	-0.035882	0.465384	0.787534
FOXO4	-0.135191	0.102869	0.238061	0.0330217	0.151482	-0.169465	-0.111952	0.0575124	0.73947	0.97592	-0.167417	0.0513182	0.218735	0.0388865	0.43989
TSPAN9	0.0197785	0.203072	0.183293	0.0330217	0.151482	-0.0149844	0.0856681	0.100652	0.186379	0.846944	-0.0364231	0.141516	0.177939	0.0302791	0.411742
CAPZA2	0.0825068	-0.243591	-0.326097	0.0330217	0.151482	0.0401304	-0.144664	-0.184795	0.297499	0.864679	0.47928	0.134463	-0.344817	0.427297	0.763818
ZNF223	-0.032379	0.128168	0.160547	0.0330217	0.151482	-0.093105	-0.0345659	0.0585391	0.68113	0.958743	-0.108249	-0.0484444	0.0598044	0.238485	0.647439
EPB41L3	0.361312	0.202392	-0.15892	0.0330217	0.151482	0.0408193	0.0134239	-0.0273954	0.398851	0.886789	0.0655083	0.0294535	-0.0360548	0.79996	0.93074
RAB8B	0.040155	-0.221447	-0.261602	0.0330217	0.151482	0.101049	0.0015351	-0.099514	0.279439	0.864679	0.13767	0.181619	0.043949	0.408937	0.756757
MYLIP	0.111208	-0.0789164	-0.190124	0.0360109	0.158054	0.0484533	-0.117224	-0.165678	0.0643409	0.841935	0.160441	0.125317	-0.035124	0.775571	0.918503
KRTCAP2	-0.197056	-0.00248002	0.194576	0.0360109	0.158054	-0.0886225	0.0393938	0.128016	0.245529	0.851802	-0.0537739	0.0461458	0.0999196	0.446115	0.772962
MYL12A	0.10543	-0.090612	-0.196042	0.0360109	0.158054	0.114503	-0.0172434	-0.131746	0.245529	0.851802	-0.0314871	-0.095025	-0.0635378	0.27918	0.670647
ATP6AP2	0.199468	-0.0902254	-0.289693	0.0360109	0.158054	0.101747	-0.0560181	-0.157765	0.186379	0.846944	0.128375	0.116224	-0.0121508	0.485095	0.803917
CAMP	-0.360036	-0.120684	0.239352	0.0360109	0.158054	-0.37517	-0.111532	0.263639	0.0130728	0.642255	-0.10478	-0.332747	-0.227966	0.775571	0.918503
EIF2C2	-0.17861	0.0658031	0.244413	0.0360109	0.158054	-0.107036	0.0307483	0.137784	0.127763	0.841935	-0.33665	0.0070402	0.34369	0.00530138	0.39589
TBL1X	-0.143148	0.197806	0.340955	0.0360109	0.158054	-0.276052	0.111677	0.387729	0.00790993	0.602341	-0.264013	0.0821433	0.346156	0.00424743	0.39589
ODC1	-0.160694	0.0556146	0.216308	0.0360109	0.158054	-0.0851629	-0.0644695	0.0206935	0.543719	0.931623	0.0543421	0.224671	0.170329	0.293709	0.683974
AMICA1	-0.112042	0.00721061	0.119252	0.0360109	0.158054	-0.0662349	0.0969862	0.163221	0.214532	0.846944	-0.249434	-0.0650631	0.184371	0.0891672	0.497442
GRINA	0.0037016	0.264499	0.260797	0.0360109	0.158054	-0.162409	-0.0286858	0.133723	0.68113	0.958743	-0.229239	-0.105202	0.124037	0.202063	0.604601
SAMD9L	0.672189	0.398932	-0.273257	0.0360109	0.158054	0.198884	-0.0826607	-0.281545	0.000190691	0.0580846	0.0215917	-0.251558	-0.273149	0.0254742	0.39589
TOR1A	0.107635	-0.000306574	-0.107942	0.0360109	0.158054	0.116208	-0.0233619	-0.13957	0.0130728	0.642255	0.0540642	0.0025675	-0.0514967	0.465384	0.787534
MARCKS	0.204697	0.0140682	-0.190628	0.0360109	0.158054	-0.0803768	-0.0739801	0.00639668	0.922122	0.992503	-0.0897805	0.216544	0.306325	0.225876	0.627753
EPB42	-0.0989234	0.155857	0.254781	0.0360109	0.158054	-0.0122972	-0.11281	-0.100513	0.73947	0.97592	-0.257927	0.0763795	0.334306	0.0831389	0.485136
HS.193767	-0.273475	0.0917549	0.36523	0.0360109	0.158054	-0.242226	-0.0969394	0.145287	0.138203	0.841935	-0.394745	-0.298222	0.0965222	0.141418	0.569788
CHD4	-0.070618	0.134428	0.205046	0.0392206	0.164554	-0.0646239	0.157691	0.222315	0.0533007	0.841935	-0.139147	-0.03096	0.108187	0.0254742	0.39589
TCP1	0.0973986	0.000588716	-0.0968099	0.0392206	0.164554	0.0386931	-0.000427032	-0.0391201	0.214532	0.846944	0.0523761	-0.0350694	-0.0874455	0.0177645	0.39589
IFIT3	0.628075	0.389374	-0.238701	0.0392206	0.164554	0.17217	-0.0596753	-0.231846	0.00400496	0.554505	-0.0592792	-0.128039	-0.0687595	0.27918	0.670647
C8ORF37	-0.0695291	0.0999924	0.169521	0.0392206	0.164554	0.0167691	-0.0436664	-0.0604355	0.421297	0.90244	-0.0780416	0.0218392	0.0998808	0.680367	0.896366
LAP3	0.672358	0.294628	-0.37773	0.0392206	0.164554	0.0945486	-0.0846943	-0.179243	0.043844	0.814322	0.080137	-0.0856246	-0.165762	0.0774362	0.485136
ANXA2P1	0.147523	0.0408255	-0.106698	0.0392206	0.164554	0.0642199	0.0177128	-0.046507	0.468278	0.920241	0.0837611	-0.0337126	-0.117474	0.356674	0.722359
LOC730820	0.112277	-0.101817	-0.214094	0.0392206	0.164554	-0.175198	-0.187533	-0.0123345	0.953226	0.997776	0.127356	0.0404677	-0.0868887	0.427297	0.763818
FKBP8	0.000986218	0.130213	0.129226	0.0392206	0.164554	-0.0722272	-0.0147488	0.0574784	1	1	-0.0496538	0.0115944	0.0612482	0.225876	0.627753
TYW1	0.0243435	0.152053	0.127709	0.0392206	0.164554	-0.00692744	0.0660148	0.0729422	0.335838	0.874328	-0.0565451	0.0829908	0.139536	0.202063	0.604601
LOC650832	0.146829	0.325176	0.178347	0.0392206	0.164554	-0.242759	0.0854735	0.328233	0.138203	0.841935	-0.18513	0.20991	0.395039	0.0121354	0.39589
MTPN	0.0945622	-0.108344	-0.202907	0.0392206	0.164554	-0.0331877	-0.0875248	-0.0543371	0.829677	0.981817	0.0812922	0.0748818	-0.00641036	0.751397	0.91331
MAP1S	0.00496918	0.174118	0.169149	0.0392206	0.164554	0.0135548	0.0344136	0.0208589	0.953226	0.997776	-0.0662036	0.0221097	0.0883133	0.408937	0.756757
HCP5	0.0931132	-0.0558905	-0.149004	0.0392206	0.164554	0.152877	0.0120881	-0.140789	0.22967	0.846944	0.077958	-0.0120403	-0.0899983	0.202063	0.604601
FAM8A1	0.096259	-0.0530089	-0.149268	0.0392206	0.164554	0.0164791	-0.00581098	-0.0222901	0.468278	0.920241	0.0323707	0.0861798	0.0538092	0.546771	0.838603
SHOC2	0.0878066	-0.067739	-0.155546	0.0392206	0.164554	-0.0323562	-0.0482548	-0.0158986	0.652614	0.950221	0.0632227	0.0608104	-0.00241224	0.427297	0.763818
RGS2	-0.00817587	-0.282594	-0.274419	0.0392206	0.164554	-0.0410368	-0.246571	-0.205534	0.200105	0.846944	-0.0145832	0.0540112	0.0685944	0.634461	0.876846
GAPDH	-0.099768	0.0590848	0.158853	0.0426624	0.171891	-0.0852729	-0.00517055	0.0801023	0.492781	0.927696	-0.20228	-0.142562	0.0597177	0.79996	0.93074
ARPC3	0.10485	0.00764767	-0.0972018	0.0426624	0.171891	0.0361069	-0.0467752	-0.0828821	0.468278	0.920241	0.122479	0	-0.122479	0.27918	0.670647
ACTR3	0.0981875	-0.0323336	-0.130521	0.0426624	0.171891	0.0600293	-0.0125434	-0.0725727	0.444443	0.91595	0.329078	0.144942	-0.184136	0.180088	0.589837
SSU72	-0.0730498	0.0415973	0.114647	0.0426624	0.171891	-0.0445349	-0.0220268	0.0225081	0.297499	0.864679	-0.0749465	-0.0182342	0.0567123	0.0720478	0.485136
WASPIP	0.100686	-0.0585649	-0.159251	0.0426624	0.171891	0.0966751	0.0257639	-0.0709112	0.377121	0.880912	0.21863	0.245191	0.0265613	0.634461	0.876846
ASCC2	-0.00820502	0.335351	0.343556	0.0426624	0.171891	-0.21916	0.222692	0.441851	0.0290208	0.736645	-0.0875444	0.454552	0.542096	0.00994975	0.39589
LOC441763	-0.0748235	0.188584	0.263408	0.0426624	0.171891	-0.0733388	0.0469478	0.120287	0.492781	0.927696	-0.00465483	-0.0094869	-0.00483207	0.949501	0.984405
C20ORF108	-0.0764886	0.141585	0.218074	0.0426624	0.171891	-0.101991	0.0546108	0.156602	0.262117	0.864679	-0.199488	0.144514	0.344001	0.0955325	0.505194
NFKB1	0.253166	0.00172161	-0.251444	0.0426624	0.171891	0.0165865	0.0923651	0.0757786	0.570107	0.931623	0.083501	0.0151558	-0.0683452	0.775571	0.918503
C22ORF13	0.0200382	0.207233	0.187195	0.0426624	0.171891	-0.108234	0.0106127	0.118846	0.160975	0.842492	-0.0939874	0.164038	0.258026	0.0121354	0.39589
KCNJ2	0.505034	0.165508	-0.339525	0.0426624	0.171891	0.00836965	-0.131341	-0.139711	0.22967	0.846944	0.071198	0.0866958	0.0154978	0.949501	0.984405
GLRX5	-0.193162	0.0921973	0.285359	0.0426624	0.171891	-0.143775	0.119373	0.263148	0.262117	0.864679	0.149785	0.268053	0.118268	0.102246	0.512239
HBG1	-0.163054	0.120057	0.283111	0.0426624	0.171891	-0.175401	0.0676352	0.243036	0.0842449	0.841935	0.145078	0.212304	0.0672259	0.27918	0.670647
TRIB1	0.0812283	-0.0051775	-0.0864058	0.0426624	0.171891	-0.0229657	-0.140919	-0.117954	0.262117	0.864679	-0.0601627	-0.00959649	0.0505662	0.703774	0.899201
GBP5	1.0014	0.633216	-0.368188	0.0426624	0.171891	0.504595	-0.0471861	-0.551781	0.000126509	0.0580846	0.0710424	-0.0402487	-0.111291	0.408937	0.756757
MED6	0.0330459	-0.0896779	-0.122724	0.0463484	0.180073	-0.0173085	-0.00833485	0.00897364	0.73947	0.97592	0.107361	-0.0257441	-0.133105	0.0534075	0.459546
LOC648210	0.124512	-0.148931	-0.273443	0.0463484	0.180073	0.292218	0.0178524	-0.274366	0.245529	0.851802	0.224484	0.0682258	-0.156258	0.308723	0.699681
TFDP1	-0.0196174	-0.0941821	-0.0745647	0.0463484	0.180073	0.00605369	-0.0180197	-0.0240734	0.543719	0.931623	0.0642449	0.0108955	-0.0533495	0.899199	0.967831
EPB49	-0.11428	0.217394	0.331674	0.0463484	0.180073	0.117728	0.0831994	-0.0345288	0.891131	0.988487	-0.251585	-0.00598435	0.245601	0.356674	0.722359
CNDP2	0.474997	0.276508	-0.198489	0.0463484	0.180073	0.154441	0.101297	-0.0531442	0.68113	0.958743	-0.0161343	0.0248539	0.0409882	0.427297	0.763818
BCKDHA	-0.0429838	0.159347	0.20233	0.0463484	0.180073	0.074751	0.153987	0.0792365	0.200105	0.846944	0.00595928	0.00209404	-0.00386524	0.611998	0.865435
EIF3E	0.0287678	-0.268486	-0.297253	0.0463484	0.180073	0.16161	0.103648	-0.0579619	0.517936	0.931623	0.434105	0.178416	-0.255689	0.141418	0.569788
MCL1	0.0968142	-0.0708042	-0.167618	0.0463484	0.180073	-0.0389618	-0.145105	-0.106143	0.421297	0.90244	0.0182909	0.0643366	0.0460457	0.568138	0.848307
RPL15	-0.040649	-0.462481	-0.421832	0.0463484	0.180073	0.140622	0.0595982	-0.0810243	0.186379	0.846944	0.283538	0.178629	-0.104909	0.159895	0.571642
HLA-DPA1	0.414661	0.152972	-0.261689	0.0463484	0.180073	0.292167	0.069687	-0.22248	0.058612	0.841935	0.163493	0.0205196	-0.142974	0.356674	0.722359
PDCD7	-0.107515	0.030344	0.137859	0.0463484	0.180073	0.0301314	-0.102928	-0.133059	0.316299	0.874271	-0.09876	-0.0248875	0.0738725	0.485095	0.803917
HS.127310	0.0292636	-0.23555	-0.264813	0.0463484	0.180073	0.12564	0.210573	0.0849329	0.769219	0.976213	0.227732	0.20238	-0.0253521	0.727457	0.902948
HS.542428	-0.0481789	0.130236	0.178415	0.0463484	0.180073	-0.0477882	-0.0205665	0.0272217	0.799303	0.976213	-0.10661	-0.0292154	0.0773947	0.150446	0.571395
FCGR1B	0.727431	0.428072	-0.299359	0.0463484	0.180073	0.131383	-0.11062	-0.242004	0.0115684	0.642255	-0.0242148	-0.0946599	-0.0704451	0.775571	0.918503
CAT	0.0576813	-0.0550714	-0.112753	0.0502905	0.190528	0.0392212	0.0487551	0.00953396	0.624584	0.950221	0.0027602	0.095352	0.0925919	0.849289	0.952479
LOC728069	0.167691	0.0297702	-0.137921	0.0502905	0.190528	0.0312072	-0.185506	-0.216713	0.0358042	0.814322	-0.0959057	-0.080161	0.0157447	0.589885	0.862183
E2F3	0.169036	-0.110365	-0.279401	0.0502905	0.190528	-0.0607861	0.0431591	0.103945	0.984401	1	0.257817	0.35741	0.0995926	0.446115	0.772962
LTA4H	0.300417	-0.0117681	-0.312185	0.0502905	0.190528	0.184871	0.13055	-0.0543203	0.421297	0.90244	-0.0175758	-0.0543311	-0.0367554	0.751397	0.91331
TMOD1	-0.0536857	0.208641	0.262327	0.0502905	0.190528	-0.130497	-0.00849046	0.122006	0.297499	0.864679	0.0992067	0.283717	0.184511	0.00811266	0.39589
CTSS	0.224429	-0.0681959	-0.292625	0.0502905	0.190528	-0.0159293	-0.0495506	-0.0336213	0.335838	0.874328	0.0230449	-0.024271	-0.047316	0.427297	0.763818
LOC391811	-0.300136	-0.000172734	0.299963	0.0502905	0.190528	-0.127311	0.0690358	0.196347	0.043844	0.814322	-0.203157	-0.0404289	0.162729	0.238485	0.647439
FAM177A1	-0.0132057	0.0717904	0.0849961	0.0502905	0.190528	-0.00155899	-0.0239851	-0.0224261	0.769219	0.976213	-0.0252797	0.0549844	0.0802641	0.159895	0.571642
ARPC5	0.136726	-0.0818858	-0.218611	0.0502905	0.190528	0.00684604	-0.0339546	-0.0408007	0.335838	0.874328	0.00509081	0.0883249	0.0832341	0.5258	0.830699
SDCBP	0.0284314	-0.167512	-0.195944	0.0502905	0.190528	-0.0990842	-0.198047	-0.0989623	0.860302	0.985143	0.101926	-0.0672116	-0.169138	0.546771	0.838603
LPP	0.119795	-0.00810215	-0.127898	0.0545012	0.197632	-0.0227285	-0.0396552	-0.0169267	0.953226	0.997776	-0.100248	-0.144047	-0.043799	1	1
MGC16703	-0.0225539	0.0818227	0.104377	0.0545012	0.197632	0.0577575	0.0111264	-0.046631	0.444443	0.91595	-0.0672659	-0.0243276	0.0429383	0.485095	0.803917
TMED2	0.000228909	-0.11511	-0.115339	0.0545012	0.197632	0.0695463	-0.00801585	-0.0775621	0.492781	0.927696	0.180322	0.024408	-0.155914	0.0891672	0.497442
CEACAM1	0.461201	0.153335	-0.307867	0.0545012	0.197632	0.0693477	-0.162553	-0.231901	0.00606879	0.586928	-0.131428	-0.0620468	0.0693815	0.356674	0.722359
PXN	-0.0422056	0.0770601	0.119266	0.0545012	0.197632	-0.0748427	-0.105765	-0.0309224	0.953226	0.997776	-0.0692305	-0.0585213	0.0107092	0.180088	0.589837
KRT3	-0.00843301	0.123422	0.131855	0.0545012	0.197632	-0.0199151	0.0605999	0.080515	0.099995	0.841935	-0.0237678	0.0643827	0.0881505	0.0621678	0.474341
CNIH4	0.202121	-0.00392111	-0.206042	0.0545012	0.197632	0.176427	0.011366	-0.165061	0.245529	0.851802	0.207396	-0.0286101	-0.236006	0.0774362	0.485136
SLC25A37	-0.143934	0.0728274	0.216762	0.0545012	0.197632	-0.147897	0.0512836	0.19918	0.127763	0.841935	-0.219711	-0.113671	0.10604	0.190849	0.599306
GK	0.355052	0.114346	-0.240706	0.0545012	0.197632	-0.0574475	-0.138705	-0.0812576	0.444443	0.91595	-0.0387367	-0.0681426	-0.0294059	0.874183	0.96198
CEP27	0.0724629	0.171265	0.0988023	0.0545012	0.197632	0.0674172	0.00542667	-0.0619905	0.891131	0.988487	-0.0624573	0.162579	0.225036	0.0534075	0.459546
TAP1	0.803375	0.334053	-0.469322	0.0545012	0.197632	0.17902	-0.0847002	-0.263721	0.117927	0.841935	-0.0156323	-0.0606115	-0.0449793	0.79996	0.93074
GLTP	0.0699741	-0.0811049	-0.151079	0.0545012	0.197632	0.0728074	0.0198339	-0.0529735	0.117927	0.841935	0.0849348	0.0809383	-0.00399648	0.37362	0.733278
HIGD2A	-0.0479734	0.0521825	0.100156	0.0545012	0.197632	0.216732	0.0896442	-0.127087	0.279439	0.864679	0.0860799	-0.0565275	-0.142607	0.159895	0.571642
NCF2	0.159461	-0.0492658	-0.208727	0.0545012	0.197632	-0.0557002	-0.199284	-0.143584	0.335838	0.874328	-0.134846	-0.120126	0.01472	0.949501	0.984405
C11ORF75	0.353648	0.137068	-0.216581	0.0545012	0.197632	0.139166	-0.0427931	-0.181959	0.0102144	0.642255	-0.0168651	-0.0176909	-0.000825855	1	1
CCBE1	-0.0309304	0.0595892	0.0905196	0.0545012	0.197632	-0.0319588	-0.0575033	-0.0255445	0.543719	0.931623	-0.0476902	-0.0791081	-0.0314179	0.568138	0.848307
HS.520591	-0.103866	0.104536	0.208402	0.0545012	0.197632	-0.163295	-0.0162742	0.147021	0.377121	0.880912	-0.190682	-0.203256	-0.0125735	0.568138	0.848307
TINP1	-0.0809931	-0.312778	-0.231785	0.0545012	0.197632	0.184575	-0.0558205	-0.240396	0.652614	0.950221	0.239881	0.0870729	-0.152808	0.00379309	0.39589
BCL2L1	-0.0705708	0.214009	0.28458	0.058993	0.207019	-0.0620657	-0.047451	0.0146148	0.68113	0.958743	-0.243711	0.021153	0.264864	0.102246	0.512239
CD53	0.0886541	0.0429694	-0.0456848	0.058993	0.207019	0.0443838	-0.123793	-0.168176	0.070508	0.841935	0.0789698	0.0151115	-0.0638583	0.391043	0.746314
APOBEC3A	0.172687	-0.0633336	-0.236021	0.058993	0.207019	0.0482813	-0.197761	-0.246042	0.0130728	0.642255	-0.0283838	-0.158785	-0.130401	0.225876	0.627753
B4GALT5	0.268607	-0.0154153	-0.284023	0.058993	0.207019	-0.0700603	-0.279057	-0.208996	0.0842449	0.841935	-0.178944	0.00289636	0.18184	0.874183	0.96198
RPS26L	-0.229136	-0.0102972	0.218839	0.058993	0.207019	0.0569891	0.00984088	-0.0471482	0.829677	0.981817	0.0268697	-0.12877	-0.15564	0.102246	0.512239
ATP5C1	0.0713436	-0.0596655	-0.131009	0.058993	0.207019	0.153742	0.0316457	-0.122096	0.543719	0.931623	0.254774	0.0991934	-0.155581	0.102246	0.512239
SERP1	0.0719846	-0.0940133	-0.165998	0.058993	0.207019	-0.00398667	-0.00647672	-0.00249005	0.468278	0.920241	0.0857759	0.0176851	-0.0680908	0.505237	0.815988
FBP1	-0.0622789	0.0565666	0.118846	0.058993	0.207019	0.00490957	-0.0735263	-0.0784359	0.398851	0.886789	0.0252901	-0.0921812	-0.117471	0.874183	0.96198
FRG1	0.0915791	-0.0206333	-0.112212	0.058993	0.207019	-0.0762586	-0.0256401	0.0506186	0.335838	0.874328	0.0584939	-0.0412003	-0.0996941	0.0720478	0.485136
CD3E	-0.219573	0.0111585	0.230732	0.058993	0.207019	0.0632199	-0.0533093	-0.116529	0.891131	0.988487	-0.0765696	-0.07254	0.00402963	0.611998	0.865435
C17ORF79	0.0190018	-0.0265703	-0.0455721	0.058993	0.207019	0.0219212	-0.024821	-0.0467422	0.200105	0.846944	0.00217064	-0.0190214	-0.021192	0.657257	0.88978
ABCA1	0.151215	-0.0592267	-0.210442	0.058993	0.207019	0.0810761	-0.0589416	-0.140018	0.444443	0.91595	0.142151	0.296586	0.154435	0.308723	0.699681
HAGH	-0.0346773	0.0310706	0.0657479	0.058993	0.207019	-0.136074	0.0792786	0.215353	0.262117	0.864679	0.00100723	0.0892872	0.08828	0.102246	0.512239
HS.397465	-0.0409073	0.0419209	0.0828282	0.058993	0.207019	-0.0736595	0.00840384	0.0820634	0.335838	0.874328	-0.0368599	-0.0145177	0.0223422	0.634461	0.876846
STAT2	0.89847	0.62599	-0.272479	0.0637787	0.217791	0.153072	0.0887481	-0.0643239	0.200105	0.846944	0.010005	-0.0569039	-0.0669088	0.465384	0.787534
TST	-0.11765	0.104309	0.221959	0.0637787	0.217791	-0.150324	-0.077872	0.0724516	0.279439	0.864679	-0.0739577	0.0474248	0.121382	0.293709	0.683974
LOC653600	-0.140488	0.0298546	0.170342	0.0637787	0.217791	-0.206376	-0.115035	0.0913406	0.127763	0.841935	-0.334554	-0.206532	0.128023	0.546771	0.838603
H2AFZ	0.0352173	-0.233909	-0.269127	0.0637787	0.217791	0.161334	0.011918	-0.149416	0.377121	0.880912	0.144071	-0.0138009	-0.157872	0.124586	0.542127
INPPL1	0.0262925	0.269008	0.242715	0.0637787	0.217791	0.0492016	0.175896	0.126694	0.039657	0.814322	-0.00986024	0.13804	0.1479	0.0177645	0.39589
TNFSF13B	0.508889	0.313443	-0.195445	0.0637787	0.217791	-0.0344758	-0.163262	-0.128786	0.149269	0.842492	-0.0814247	-0.117534	-0.0361095	0.924313	0.978949
RBM22	0.0581769	-0.11423	-0.172407	0.0637787	0.217791	0.0681999	-0.0121546	-0.0803545	0.799303	0.976213	0.0738492	0.0872061	0.0133569	0.974738	0.995658
C7ORF59	-0.150195	-0.0054173	0.144778	0.0637787	0.217791	-0.148653	-0.0557134	0.0929396	0.377121	0.880912	-0.0730448	-0.00330028	0.0697445	0.356674	0.722359
JARID1A	-0.0973264	0.109722	0.207048	0.0637787	0.217791	0.0128319	0.0283382	0.0155064	0.492781	0.927696	-0.0908632	0.0856765	0.17654	0.0177645	0.39589
RGS18	0.0216123	-0.23659	-0.258202	0.0637787	0.217791	0.32416	0.0526766	-0.271483	0.186379	0.846944	0.994585	0.622812	-0.371773	0.485095	0.803917
LOC389286	0.02514	0.253557	0.228417	0.0637787	0.217791	-0.122912	0.0436103	0.166522	0.138203	0.841935	-0.0734793	0.125598	0.199078	0.150446	0.571395
DEFA1	-0.255297	-0.0212408	0.234056	0.0637787	0.217791	-0.116327	0	0.116327	0.200105	0.846944	-0.349991	-0.410918	-0.0609275	0.849289	0.952479
ZMAT3	-0.164525	-0.0665528	0.0979727	0.0688707	0.227527	-0.111068	-0.0960827	0.0149855	0.377121	0.880912	-0.192362	-0.18041	0.0119514	0.899199	0.967831
NUTF2	0.0523836	0.00092691	-0.0514567	0.0688707	0.227527	0.0475652	0.0230818	-0.0244834	0.22967	0.846944	0.0168254	-0.0170972	-0.0339226	0.485095	0.803917
HLA-G	-0.0194922	0.181861	0.201353	0.0688707	0.227527	-0.0154054	-0.0827012	-0.0672958	0.68113	0.958743	-0.119803	-0.110238	0.00956529	0.775571	0.918503
RNASET2	-0.10738	0.185758	0.293138	0.0688707	0.227527	-0.0773399	-0.0733139	0.00402605	0.377121	0.880912	-0.207831	0.186551	0.394382	0.0669622	0.474341
LOC650518	0.0373869	-0.068727	-0.106114	0.0688707	0.227527	0.221105	0.124445	-0.0966596	0.543719	0.931623	0.370722	0.128224	-0.242497	0.0302791	0.411742
CUEDC1	0.0194581	0.154332	0.134874	0.0688707	0.227527	-0.0184993	-0.0179854	0.000513897	0.860302	0.985143	-0.227312	-0.0206346	0.206677	0.159895	0.571642
LOC645436	0.0440379	-0.106258	-0.150295	0.0688707	0.227527	0.214792	0.0719085	-0.142884	0.444443	0.91595	0.206706	0.142619	-0.0640875	0.589885	0.862183
SEC11C	0.0173726	-0.0837344	-0.101107	0.0688707	0.227527	0.00459697	-0.00611707	-0.010714	0.570107	0.931623	0.0430375	-0.06965	-0.112688	0.0147214	0.39589
ATP6V1A	0.249861	-0.0626782	-0.312539	0.0688707	0.227527	-0.0694101	-0.0314875	0.0379226	0.953226	0.997776	0.25486	0.287349	0.0324885	0.82454	0.942774
S100A6	-0.145236	0.163435	0.308671	0.0688707	0.227527	-0.192666	0.156359	0.349025	0.214532	0.846944	0.0222763	0.113988	0.0917113	0.611998	0.865435
PICALM	0.0440366	-0.0439681	-0.0880047	0.0688707	0.227527	-0.0382171	-0.0275239	0.0106932	0.769219	0.976213	0.044649	-0.0334462	-0.0780952	0.611998	0.865435
OSBPL8	0.0271584	-0.154259	-0.181417	0.0688707	0.227527	-0.0361936	-0.0712025	-0.0350089	0.335838	0.874328	0.0316218	0.0418491	0.0102273	0.657257	0.88978
HS.528284	-0.0138288	0.038065	0.0518938	0.0688707	0.227527	0.0123187	0.031762	0.0194433	0.652614	0.950221	-0.0629518	0.0528657	0.115817	0.0955325	0.505194
HS.413494	0	-0.150866	-0.150866	0.0688707	0.227527	0.00403928	0.0240215	0.0199822	0.860302	0.985143	0.0243913	0.127816	0.103424	0.408937	0.756757
C11ORF2	-0.254509	-0.0316091	0.2229	0.0688707	0.227527	-0.12938	0.154842	0.284223	0.0260523	0.734772	-0.145118	0.053346	0.198464	0.0254742	0.39589
LOC646135	-0.00049733	0.0702285	0.0707258	0.0742821	0.238172	0.0128624	0.013207	0.000344609	0.356113	0.880912	-0.0303038	0.0293211	0.059625	0.150446	0.571395
MET	0.00314544	0.0349005	0.031755	0.0742821	0.238172	-0.0217279	0.0356962	0.0574241	0.421297	0.90244	-0.029713	0.0301351	0.0598482	0.0109959	0.39589
SDPR	0.13787	-0.15745	-0.29532	0.0742821	0.238172	0.00104201	0.0584171	0.0573751	0.769219	0.976213	0.486966	0.507688	0.020722	0.657257	0.88978
OGFR	0.130074	0.334518	0.204444	0.0742821	0.238172	-0.0732833	-0.099852	-0.0265687	0.891131	0.988487	-0.112128	-0.121803	-0.0096753	0.505237	0.815988
GLRX	0.104913	-0.0951571	-0.20007	0.0742821	0.238172	0.0984404	-0.0805734	-0.179014	0.769219	0.976213	0.285071	-0.0270787	-0.31215	0.124586	0.542127
TMEM55A	0.0739776	-0.119948	-0.193925	0.0742821	0.238172	0.0617462	-0.0335455	-0.0952917	0.356113	0.880912	0.0883032	0.260191	0.171888	0.446115	0.772962
RASGRP1	0.0257452	-0.134451	-0.160196	0.0742821	0.238172	0.115674	0.0191652	-0.0965092	0.186379	0.846944	0.224655	0.137548	-0.0871065	0.202063	0.604601
ZNF430	-0.0745046	0.0430616	0.117566	0.0742821	0.238172	0.00749721	0.0017668	-0.00573041	0.984401	1	-0.16443	0.00122266	0.165653	0.116762	0.523025
DUXAP3	-0.0750583	0.0163682	0.0914266	0.0742821	0.238172	-0.0234247	-0.0209831	0.00244165	0.73947	0.97592	-0.0835474	-0.0649968	0.0185506	0.37362	0.733278
ATP6V1B2	0.19469	0.0327101	-0.16198	0.0742821	0.238172	-0.0257024	-0.116333	-0.0906301	0.377121	0.880912	0.108297	-0.0795057	-0.187803	0.680367	0.896366
HS.508682	-0.0104794	0.10004	0.110519	0.0742821	0.238172	0.0301572	0.0871156	0.0569583	0.421297	0.90244	-0.0495145	0.0175686	0.0670832	0.340207	0.722359
IFI27	-0.0840714	0.168318	0.252389	0.0742821	0.238172	0.088515	0.0813016	-0.00721338	0.922122	0.992503	-0.0140928	0.0195054	0.0335981	0.751397	0.91331
HIST1H4C	-0.367401	-0.0553224	0.312078	0.0742821	0.238172	-0.170343	-0.285492	-0.115148	0.652614	0.950221	-0.224716	-0.214462	0.010254	0.79996	0.93074
HBG2	-0.12699	0.061112	0.188102	0.0742821	0.238172	-0.0922403	0.198453	0.290693	0.160975	0.842492	0.0751937	0.162012	0.086818	0.238485	0.647439
STS-1	-0.0203161	-0.0922362	-0.0719201	0.0800256	0.24744	0.102653	0.0472917	-0.0553615	0.543719	0.931623	0.093626	0.137295	0.0436691	0.79996	0.93074
COX6C	-0.0258142	0.0857132	0.111527	0.0800256	0.24744	0.00953226	-0.0131482	-0.0226805	0.891131	0.988487	0.0842023	0.147575	0.0633727	0.611998	0.865435
CYBB	0.285195	0.150934	-0.134261	0.0800256	0.24744	0.100469	0.189145	0.0886759	0.570107	0.931623	0.0736592	0.0440281	-0.029631	0.849289	0.952479
LOC651143	0.0516352	-0.0247361	-0.0763713	0.0800256	0.24744	-0.0212194	0.0271719	0.0483914	0.652614	0.950221	-0.0169798	-0.0925769	-0.0755971	1	1
CCNG1	0.00856504	-0.077745	-0.0863101	0.0800256	0.24744	0.0448005	-0.0413706	-0.0861711	0.160975	0.842492	0.107643	0.00542124	-0.102222	0.0358174	0.43989
ITK	0.0291194	-0.369629	-0.398748	0.0800256	0.24744	0.247122	0.12055	-0.126572	0.543719	0.931623	0.192324	0.17569	-0.0166348	0.340207	0.722359
STRADB	0.0232947	0.2108	0.187505	0.0800256	0.24744	-0.147495	0.137696	0.285191	0.17334	0.846944	0.206703	0.343982	0.137279	0.102246	0.512239
NRGN	-0.0811982	0.196774	0.277972	0.0800256	0.24744	-0.118023	0.0306879	0.14871	0.22967	0.846944	-0.341307	0.0132101	0.354517	0.109319	0.512285
LOC653778	0.0649609	-0.0249324	-0.0898933	0.0800256	0.24744	-0.142403	-0.246532	-0.104129	0.543719	0.931623	-0.118798	-0.0209437	0.0978538	0.775571	0.918503
RAB40C	-0.199743	0.034007	0.23375	0.0800256	0.24744	-0.00931266	0.135221	0.144534	0.138203	0.841935	-0.203835	0.0194103	0.223245	0.0831389	0.485136
IL18RAP	-0.00751405	-0.145895	-0.138381	0.0800256	0.24744	0.105915	-0.163775	-0.26969	0.0533007	0.841935	0.117855	0.0597342	-0.0581207	0.37362	0.733278
LYSMD2	0.306522	0.245194	-0.0613287	0.0800972	0.24744	0.201656	-0.0879663	-0.289622	0.0358042	0.814322	0.227396	0.127798	-0.0995985	0.465384	0.787534
DEFA4	-0.180035	0.0250102	0.205045	0.0800256	0.24744	-0.08341	-0.110245	-0.0268349	0.68113	0.958743	-0.0992506	-0.201705	-0.102455	0.974738	0.995658
REEP5	-0.0268775	-0.265777	-0.2389	0.0800256	0.24744	-0.000126108	0.00970081	0.00982691	0.570107	0.931623	0.188511	0.265511	0.0769999	0.657257	0.88978
LMOD3	-0.146761	-0.0297355	0.117025	0.0800256	0.24744	-0.144275	-0.152386	-0.00811077	0.769219	0.976213	-0.208125	-0.122099	0.0860253	0.116762	0.523025
PNPLA2	-0.0914693	0.0227283	0.114198	0.0800256	0.24744	0.0151428	-0.0466787	-0.0618216	0.891131	0.988487	-0.121539	-0.0675162	0.0540228	0.25157	0.658318
ATP6V1D	0.0589093	-0.0620154	-0.120925	0.0800256	0.24744	-0.0427345	-0.0648488	-0.0221143	0.984401	1	0.120134	-0.0191282	-0.139262	0.124586	0.542127
HN1	0.0248355	-0.0493665	-0.074202	0.0800256	0.24744	0.0150581	-0.103247	-0.118305	0.117927	0.841935	0.0293723	-0.0213314	-0.0507038	0.775571	0.918503
LOC654161	-0.0468792	0.0203	0.0671792	0.0861142	0.253679	-0.0340682	-0.0421475	-0.00807929	0.891131	0.988487	-0.0431232	0.015517	0.0586403	0.109319	0.512285
LOC643433	-0.241918	-0.0642329	0.177685	0.0861142	0.253679	-0.127033	0.0535635	0.180597	0.186379	0.846944	-0.0199847	-0.00619531	0.0137894	0.657257	0.88978
ZDHHC18	-0.10602	0.115946	0.221966	0.0861142	0.253679	-0.327544	-0.0577664	0.269778	0.22967	0.846944	-0.261998	-0.248681	0.0133173	0.308723	0.699681
SAMM50	-0.0644379	0.0821159	0.146554	0.0861142	0.253679	-0.0030227	0.0793675	0.0823902	0.398851	0.886789	-0.0296182	-0.00293364	0.0266846	0.82454	0.942774
NT5C2	0.291343	0.0209313	-0.270411	0.0861142	0.253679	-0.121261	-0.0917812	0.02948	0.421297	0.90244	-0.111879	0.0580117	0.169891	0.0831389	0.485136
FAM83F	-0.0274942	0.0718128	0.099307	0.0861142	0.253679	0.000639431	-0.0799253	-0.0805647	0.624584	0.950221	-0.0649518	0.0334572	0.098409	0.265134	0.667436
PARP14	0.687218	0.438052	-0.249166	0.0861142	0.253679	0.0277664	-0.0275683	-0.0553347	0.127763	0.841935	-0.0778669	-0.114784	-0.0369174	0.849289	0.952479
LOC642817	0.0052353	-0.130077	-0.135313	0.0861142	0.253679	0.323416	0.177221	-0.146195	0.22967	0.846944	0.268177	0.203899	-0.0642778	0.356674	0.722359
MTCH1	-0.0307812	-0.10495	-0.0741689	0.0861142	0.253679	0.138863	0.0470362	-0.0918269	0.149269	0.842492	-0.00291294	-0.0950322	-0.0921192	0.169772	0.581041
UBE2L6	0.583391	0.36864	-0.21475	0.0861142	0.253679	0.039686	-0.0665487	-0.106235	0.0147414	0.660328	0.0033948	-0.0763796	-0.0797744	0.82454	0.942774
FLJ22662	0.146181	0.0442479	-0.101933	0.0861142	0.253679	-0.0443328	-0.368671	-0.324338	0.200105	0.846944	0.0147292	-0.18984	-0.204569	0.27918	0.670647
PSTPIP2	0.312506	0.196529	-0.115976	0.0861142	0.253679	0.0463701	-0.129911	-0.176281	0.149269	0.842492	0.0149815	-0.0220245	-0.037006	0.727457	0.902948
MYOM2	-0.165081	0.0217132	0.186794	0.0861142	0.253679	0.0259903	0.0838507	0.0578604	0.652614	0.950221	0.000886955	0.0296014	0.0287144	0.568138	0.848307
C20ORF177	-0.132959	-0.0159146	0.117045	0.0861142	0.253679	-0.101128	0.103971	0.205099	0.297499	0.864679	-0.0902115	-0.230815	-0.140603	0.849289	0.952479
MYH4	-0.0176206	0.0469737	0.0645943	0.0861142	0.253679	-0.0608262	-0.0335557	0.0272705	0.652614	0.950221	-0.0517503	0.00647909	0.0582294	0.634461	0.876846
C17ORF62	-0.0773855	0.0953254	0.172711	0.0861142	0.253679	-0.150091	-0.171259	-0.0211672	0.710093	0.971673	-0.113307	-0.312564	-0.199257	0.446115	0.772962
GBP4	0.928349	0.515142	-0.413208	0.0861142	0.253679	0.162253	-0.0635714	-0.225825	0.070508	0.841935	-0.00401983	-0.0738072	-0.0697874	0.680367	0.896366
CD19	-0.292428	-0.0485729	0.243855	0.0861142	0.253679	-0.0314133	0.0861185	0.117532	0.0290208	0.736645	-0.00591132	0.0617101	0.0676214	0.485095	0.803917
ATP6V0D1	0.0283745	0.269861	0.241486	0.0861142	0.253679	-0.179595	0.0564893	0.236084	0.099995	0.841935	-0.295191	-0.0260704	0.26912	0.0133749	0.39589
KIAA1274	0.0430341	-0.0248037	-0.0678378	0.0861142	0.253679	0.0244338	-0.00770817	-0.032142	0.73947	0.97592	0.00430459	-0.0306524	-0.034957	0.657257	0.88978
SNAPIN	0.0815898	-0.0103062	-0.0918961	0.0861142	0.253679	0.0227191	0.042211	0.0194919	0.953226	0.997776	0.0169367	0.0543261	0.0373893	0.657257	0.88978
C2ORF25	0.0503334	-0.188881	-0.239214	0.0861142	0.253679	0.0424311	-0.0609936	-0.103425	0.297499	0.864679	0.129574	-0.000253757	-0.129828	0.109319	0.512285
HS.572649	-0.241136	-0.00859825	0.232538	0.0861142	0.253679	-0.088256	0.080481	0.168737	0.0918579	0.841935	-0.00672529	-0.131924	-0.125199	0.446115	0.772962
HBM	0.00556555	0.0817001	0.0761346	0.0860181	0.253679	-0.0686179	-0.0924557	-0.0238378	0.543719	0.931623	-0.0467074	0.0478961	0.0946035	0.25157	0.658318
SKAP2	0.0735384	-0.0614104	-0.134949	0.0925604	0.263988	-0.0804615	-0.0604967	0.0199648	0.710093	0.971673	0.0925328	0.140358	0.0478249	0.751397	0.91331
FSTL4	-0.0105283	0.0294678	0.0399961	0.0925604	0.263988	-0.0226688	0.0367093	0.0593781	0.245529	0.851802	-0.0751298	0.0320025	0.107132	0.0534075	0.459546
SEC11A	0.0301332	-0.0535686	-0.0837018	0.0925604	0.263988	0.118555	-0.0761682	-0.194723	0.138203	0.841935	0.200954	0.0575697	-0.143384	0.102246	0.512239
SLC7A5	0.00760084	0.150505	0.142904	0.0925604	0.263988	-0.0544448	0.0429931	0.0974379	0.108678	0.841935	-0.0333714	0.0600421	0.0934135	0.356674	0.722359
RYBP	-0.0554462	0.0412835	0.0967296	0.0925604	0.263988	-0.205379	-0.00580172	0.199578	0.138203	0.841935	-0.281306	-0.151352	0.129955	0.0277899	0.411742
IFI44L	0.723141	0.361857	-0.361284	0.0925604	0.263988	0.271275	0.0300009	-0.241275	0.0186261	0.69189	-0.0523622	-0.114145	-0.0617829	0.340207	0.722359
ANKRD30B	-0.0505374	0.120013	0.17055	0.0925604	0.263988	0.023936	-0.0130689	-0.0370048	0.984401	1	-0.116993	0.146802	0.263795	0.049419	0.450689
MNDA	0.111064	-0.0433602	-0.154424	0.0925604	0.263988	-0.226473	-0.167782	0.0586904	0.769219	0.976213	0.2036	-0.143454	-0.347054	0.109319	0.512285
ATP5A1	0.134326	-0.0735508	-0.207877	0.0925604	0.263988	0.177348	0.158606	-0.0187416	0.710093	0.971673	0.160077	-0.0425892	-0.202667	0.0456765	0.450689
RBM25	0.0166577	-0.112641	-0.129299	0.0925604	0.263988	-0.0334472	0.072323	0.10577	0.891131	0.988487	0.274298	0.25498	-0.0193177	0.751397	0.91331
RENBP	-0.0337772	0.15521	0.188988	0.0925604	0.263988	0.000652127	-0.0520627	-0.0527148	0.652614	0.950221	-0.164107	-0.0799248	0.084182	0.465384	0.787534
N4BP2	0.0244136	0.0883638	0.0639502	0.0925604	0.263988	0.00409766	0.0307962	0.0266986	0.543719	0.931623	-0.0220434	0.0222299	0.0442733	0.324223	0.714605
TMEM158	0.0642107	0.157289	0.0930783	0.0925604	0.263988	0.00290352	0.0709599	0.0680563	0.377121	0.880912	-0.00165617	0.183714	0.18537	0.00994975	0.39589
LOC647741	-0.0354483	0.0621685	0.0976168	0.0925604	0.263988	-0.0508471	-0.00512303	0.0457241	0.335838	0.874328	-0.0368876	0.0235588	0.0604464	0.265134	0.667436
HS.568928	0.0211949	0.222616	0.201421	0.0925604	0.263988	0.103215	0.0761093	-0.0271062	0.829677	0.981817	-0.124883	0.0766179	0.2015	0.0720478	0.485136
RSL24D1	0.0861664	-0.0948884	-0.181055	0.0925604	0.263988	0.135436	0.163433	0.0279972	0.73947	0.97592	0.514221	0.347864	-0.166357	0.124586	0.542127
LOC729603	-0.0681869	-0.017905	0.0502818	0.0925604	0.263988	0.0542799	-0.0239748	-0.0782547	0.860302	0.985143	-0.111518	-0.0976577	0.0138604	0.703774	0.899201
SIGLEC10	0.216828	-0.124286	-0.341114	0.0993771	0.276694	0.0566569	0.0461432	-0.0105137	0.860302	0.985143	-0.0513901	-0.0486894	0.00270068	0.225876	0.627753
CXCR1	-0.195523	0.0202801	0.215803	0.0993771	0.276694	-0.224449	-0.241972	-0.0175238	0.517936	0.931623	-0.322008	-0.0899252	0.232083	0.049419	0.450689
PDXK	-0.119184	-0.0179493	0.101235	0.0993771	0.276694	-0.10534	0.097181	0.202521	0.149269	0.842492	-0.0750985	-0.0177041	0.0573944	0.0534075	0.459546
VCAN	0.185158	-0.0888017	-0.27396	0.0993771	0.276694	0.098526	-0.0322959	-0.130822	0.710093	0.971673	0.0281455	-0.0902888	-0.118434	0.356674	0.722359
DDT	-0.181706	0.0158009	0.197507	0.0993771	0.276694	0.0264298	-0.122043	-0.148473	0.543719	0.931623	-0.0486564	-0.176861	-0.128205	0.0233228	0.39589
RAB7A	0.0999352	-0.0646331	-0.164568	0.0993771	0.276694	-0.0839573	-0.117907	-0.03395	0.570107	0.931623	0.0258277	0.0508749	0.0250472	0.700183	0.899201
GLT25D1	-0.0764005	-0.024491	0.0519095	0.0993771	0.276694	-0.0711408	-0.0112189	0.0599219	0.316299	0.874271	-0.130033	-0.0699624	0.0600705	0.238485	0.647439
TLR1	0.0632124	0.00563743	-0.057575	0.0993771	0.276694	-0.0260798	-0.0506193	-0.0245395	0.922122	0.992503	-0.0568193	0.0624557	0.119275	0.202063	0.604601
EPN1	-0.026787	0.0809269	0.107714	0.0993771	0.276694	-0.0029915	-0.0504628	-0.0474713	0.73947	0.97592	-0.147483	-0.102748	0.0447346	0.213737	0.618861
SOD2	0.324553	0.10899	-0.215563	0.0993771	0.276694	-0.113574	-0.14533	-0.0317564	0.860302	0.985143	-0.0421494	-0.0695787	-0.0274292	0.949501	0.984405
LOC729466	-0.0151751	-0.128745	-0.11357	0.0993771	0.276694	0.201173	0.205776	0.00460252	0.468278	0.920241	0.53106	0.208806	-0.322254	0.0254742	0.39589
BLZF1	-0.0645823	-0.0157737	0.0488085	0.0993771	0.276694	-0.0277099	-0.0618693	-0.0341594	0.710093	0.971673	-0.171529	-0.0883182	0.0832111	0.293709	0.683974
FCGR1A	0.454963	0.247642	-0.207321	0.0993771	0.276694	0.132442	-0.13607	-0.268512	0.039657	0.814322	-0.107365	-0.0524072	0.0549578	0.727457	0.902948
ECH1	-0.107911	0.0208987	0.12881	0.106577	0.282781	0.125483	0.0822897	-0.0431937	0.316299	0.874271	0.0280015	-0.0284726	-0.0564741	0.340207	0.722359
LOC644250	-0.0779031	0.0605254	0.138428	0.106577	0.282781	-0.0546643	-0.0698298	-0.0151655	0.398851	0.886789	-0.273651	0.102895	0.376546	0.00811266	0.39589
POLR2J3	0.0623705	-0.0189202	-0.0812907	0.106577	0.282781	0.026389	-0.0256217	-0.0520107	0.316299	0.874271	0.076687	0.0246701	-0.0520168	0.238485	0.647439
CA2	0.169131	0.012497	-0.156634	0.106577	0.282781	0.0442838	0.144189	0.0999051	0.570107	0.931623	0.16802	0.267297	0.0992772	0.657257	0.88978
IL8	0.0603675	-0.0947442	-0.155112	0.106577	0.282781	0.00399411	0.088178	0.0841839	0.891131	0.988487	0.277095	0.243276	-0.033819	0.924313	0.978949
ARID3A	-0.0575017	0.220966	0.278468	0.106577	0.282781	-0.115546	-0.0615786	0.0539672	0.356113	0.880912	-0.255746	0.0422449	0.297991	0.00474884	0.39589
HSPB1	-0.046671	0.203351	0.250022	0.106577	0.282781	-0.0570587	0.0887195	0.145778	0.279439	0.864679	0.203929	0.115018	-0.0889113	0.949501	0.984405
LOC651202	0.0131852	-0.0394415	-0.0526267	0.106577	0.282781	0.068603	0.139772	0.0711687	0.799303	0.976213	0.0984113	0.0165951	-0.0818162	0.0456765	0.450689
TP53INP2	-0.0275955	0.0308883	0.0584838	0.106577	0.282781	-0.191346	-0.0443252	0.147021	0.127763	0.841935	-0.137091	-0.0513838	0.0857075	0.0534075	0.459546
PLEKHO2	-0.052626	0.164068	0.216694	0.106577	0.282781	-0.158745	-0.123957	0.0347873	0.860302	0.985143	-0.169352	-0.180573	-0.0112215	0.703774	0.899201
STOM	0.201196	0.0400328	-0.161163	0.106577	0.282781	0.0716263	-0.00782165	-0.079448	0.17334	0.846944	0.0300392	0.160426	0.130386	0.202063	0.604601
HLA-DRB5	0.109362	0.0466985	-0.0626634	0.106577	0.282781	0.0461139	0.0110306	-0.0350833	0.214532	0.846944	0.0218784	0.0327661	0.0108876	0.874183	0.96198
FAM43A	0.0277937	-0.0656277	-0.0934214	0.106577	0.282781	0.0261268	0.0131545	-0.0129723	0.356113	0.880912	0.111033	0.0194189	-0.0916138	0.308723	0.699681
LOC645895	0.00807966	0.133875	0.125795	0.106577	0.282781	0.157269	-0.068855	-0.226124	0.245529	0.851802	-0.285256	-0.0589917	0.226264	0.546771	0.838603
GADD45B	0.150516	0.068651	-0.0818651	0.106577	0.282781	0.0256073	-0.0375296	-0.0631368	0.335838	0.874328	-0.0461739	-0.0214369	0.0247371	0.849289	0.952479
MAGT1	-0.216589	-0.0388331	0.177756	0.106577	0.282781	0.029189	-0.169435	-0.198624	0.652614	0.950221	-0.27832	-0.261503	0.0168168	0.611998	0.865435
IL17REL	0.0256255	0.0958268	0.0702012	0.106577	0.282781	-0.0744183	0.0325832	0.107002	0.0771358	0.841935	-0.0808677	0.0678112	0.148679	0.0576534	0.469552
TKT	-0.281134	0.0123912	0.293525	0.106577	0.282781	-0.125548	-0.0160032	0.109545	0.829677	0.981817	-0.376238	-0.205082	0.171156	0.225876	0.627753
MAST3	-0.150794	0.0530795	0.203874	0.106577	0.282781	-0.197819	0.0303782	0.228198	0.279439	0.864679	-0.297273	-0.106879	0.190394	0.0955325	0.505194
SH2B3	0.114942	0.0427798	-0.0721625	0.106577	0.282781	-0.0151261	-0.0709959	-0.0558698	0.468278	0.920241	-0.125484	-0.0508287	0.0746556	0.109319	0.512285
MT1X	-0.110576	0.0784104	0.188987	0.106577	0.282781	0.125964	0.031095	-0.0948689	0.597071	0.93843	-0.0431747	-0.0490802	-0.00590544	0.849289	0.952479
ZNF467	-0.0768519	0.202244	0.279096	0.106577	0.282781	-0.369035	-0.148974	0.220061	0.117927	0.841935	-0.164807	0.0822708	0.247078	0.0831389	0.485136
RASAL3	-0.0598763	0.00661118	0.0664874	0.106577	0.282781	-0.0838378	0.193831	0.277668	0.17334	0.846944	-0.0162163	0.0163217	0.0325381	0.446115	0.772962
LOC654103	0.200182	-0.0454709	-0.245653	0.106577	0.282781	-0.0433169	-0.0643738	-0.021057	0.517936	0.931623	-0.0718886	0.102425	0.174313	0.293709	0.683974
DHRS7	-0.0488812	-0.209572	-0.16069	0.106577	0.282781	-0.0423759	-0.0873514	-0.0449756	0.297499	0.864679	-0.0811391	-0.0879556	-0.00681646	0.589885	0.862183
ICAM3	-0.20276	0.0362371	0.238997	0.106577	0.282781	-0.16602	-0.0484114	0.117608	0.245529	0.851802	-0.295774	-0.128058	0.167716	0.150446	0.571395
PRO1853	-0.075356	0.0187554	0.0941113	0.106577	0.282781	-0.0227818	-0.0158624	0.00691946	0.543719	0.931623	-0.0287923	-0.00461755	0.0241747	0.703774	0.899201
PIK3AP1	0.189577	0.0472121	-0.142365	0.114171	0.293721	0.0713901	-0.0853291	-0.156719	0.138203	0.841935	0.13689	0.0440213	-0.0928689	0.849289	0.952479
SAR1A	0.0991842	-0.0492778	-0.148462	0.114171	0.293721	0.163462	-0.00559195	-0.169054	0.0483847	0.818777	0.0598041	0.00738541	-0.0524187	0.124586	0.542127
LOC646562	-0.00583948	0.0259249	0.0317644	0.114171	0.293721	-0.123451	-0.0338021	0.0896492	0.398851	0.886789	-0.0111406	-0.0210478	-0.00990719	0.356674	0.722359
CAMK2A	-0.0490852	0.0197251	0.0688103	0.114171	0.293721	0.0219138	0.0413524	0.0194386	0.597071	0.93843	0.0312621	0.0357318	0.00446973	0.874183	0.96198
USP49	0.0151813	0.0459603	0.030779	0.114171	0.293721	-0.163698	-0.0467476	0.11695	0.799303	0.976213	-0.0526085	-0.0528602	-0.000251734	0.703774	0.899201
C14ORF166	0.00625418	-0.102656	-0.10891	0.114171	0.293721	0.00660527	-0.0181087	-0.024714	0.468278	0.920241	0.0797983	-0.0195586	-0.0993569	0.0955325	0.505194
PPP1CC	0.0827915	-0.124813	-0.207604	0.114171	0.293721	0.1077	0.112382	0.00468164	0.922122	0.992503	0.233704	0.203895	-0.0298085	0.657257	0.88978
CYP27A1	-0.0983628	0.0119899	0.110353	0.114171	0.293721	-0.0415768	-0.129972	-0.0883952	0.769219	0.976213	-0.16985	-0.127018	0.0428323	0.356674	0.722359
C6ORF115	0.0837162	-0.0142158	-0.097932	0.114171	0.293721	0.0914893	-0.0537367	-0.145226	0.138203	0.841935	0.0923886	-0.0190485	-0.111437	0.202063	0.604601
HLA-C	-0.0471209	0.0959242	0.143045	0.114171	0.293721	-0.058719	-0.0458923	0.0128267	0.953226	0.997776	-0.0812708	-0.0839159	-0.00264515	0.634461	0.876846
MOBKL2A	0.114419	0.195592	0.0811729	0.114171	0.293721	-0.238609	-0.0702564	0.168353	0.043844	0.814322	-0.167241	0.119944	0.287185	0.0831389	0.485136
ROM1	0.0222377	0.068292	0.0460543	0.114171	0.293721	-0.0297392	0.0307087	0.0604479	0.492781	0.927696	-0.0546119	-0.0044241	0.0501878	0.0576534	0.469552
CCDC92	-0.10297	0.0487553	0.151726	0.114171	0.293721	0.070614	0.181076	0.110462	0.108678	0.841935	-0.0217568	0.107479	0.129236	0.102246	0.512239
PCNX	-0.206323	0.0347525	0.241075	0.114171	0.293721	-0.12939	-0.0569187	0.0724711	0.335838	0.874328	-0.215547	-0.100642	0.114906	0.202063	0.604601
GIMAP1	0.0613828	-0.0322245	-0.0936072	0.114171	0.293721	0.023015	0.00325626	-0.0197588	0.377121	0.880912	0.0425404	0.00470111	-0.0378393	0.0831389	0.485136
TRAPPC6A	-0.0915617	0.044572	0.136134	0.114171	0.293721	-0.0171238	-0.000366372	0.0167574	0.799303	0.976213	-0.090196	-0.0130216	0.0771744	0.159895	0.571642
PPM1F	-0.16114	0.0531416	0.214282	0.114171	0.293721	-0.0431016	-0.021365	0.0217365	0.297499	0.864679	-0.0798377	-0.0993966	-0.0195589	0.109319	0.512285
CRCP	-0.000499319	0.0540548	0.0545542	0.114171	0.293721	-0.015789	-0.083298	-0.067509	0.597071	0.93843	-0.0645222	-0.0256775	0.0388447	0.703774	0.899201
PINK1	-0.0619588	0.0506371	0.112596	0.122173	0.309086	-0.0449737	-0.0684366	-0.0234629	0.517936	0.931623	-0.154716	-0.0328146	0.121901	0.568138	0.848307
LOC644330	0.0537828	-0.0222029	-0.0759857	0.122173	0.309086	-0.0112715	0.0236724	0.0349439	0.624584	0.950221	0.0284142	0.0549499	0.0265357	0.5258	0.830699
ADM	0.289089	0.0962346	-0.192854	0.122173	0.309086	-0.0361332	-0.269924	-0.233791	0.0260523	0.734772	-0.0546722	0	0.0546722	0.485095	0.803917
ARF4	0.0215227	-0.0424345	-0.0639572	0.122173	0.309086	-0.00856516	-0.0587484	-0.0501833	0.624584	0.950221	0.0551636	-0.0286579	-0.0838215	0.169772	0.581041
WAS	0.209359	0.00502616	-0.204333	0.122173	0.309086	-0.0114275	-0.17873	-0.167303	0.543719	0.931623	-0.176395	-0.199869	-0.023474	0.751397	0.91331
SRGN	-0.0800064	-0.164363	-0.084357	0.122173	0.309086	-0.0238895	-0.200083	-0.176194	0.860302	0.985143	0.233766	0.083552	-0.150214	0.589885	0.862183
EID2B	-0.1857	-0.0765516	0.109148	0.122173	0.309086	-0.0167974	-0.0423833	-0.0255859	0.597071	0.93843	-0.142573	-0.0386613	0.103911	0.324223	0.714605
PIP5K2B	-0.14614	0.0259284	0.172068	0.122173	0.309086	-0.0595149	-0.0399164	0.0195984	0.73947	0.97592	-0.222873	-0.155475	0.0673975	0.213737	0.618861
HS.553301	0.0243255	-0.114943	-0.139268	0.122173	0.309086	0.16247	0.0146807	-0.147789	0.0643409	0.841935	0.149466	0.206491	0.057025	1	1
MYST3	-0.0710163	0.0932018	0.164218	0.122173	0.309086	-0.174682	0.0503506	0.225033	0.070508	0.841935	-0.429977	-0.175378	0.254599	0.202063	0.604601
CIR1	0.152279	0.0243848	-0.127894	0.130594	0.323407	-0.0109829	-0.0390372	-0.0280543	0.444443	0.91595	0.0263634	0.0407623	0.0143989	1	1
PLEKHM2	-0.0190018	0.064116	0.0831178	0.130594	0.323407	-0.0415711	-0.0217233	0.0198478	0.953226	0.997776	-0.148862	-0.142532	0.00632925	0.356674	0.722359
FLNA	-0.0591938	0.0315781	0.0907719	0.130594	0.323407	-0.0386144	-0.00486691	0.0337475	0.73947	0.97592	-0.0639314	0.0156996	0.079631	0.213737	0.618861
SNCA	-0.148947	0.235946	0.384893	0.130594	0.323407	-0.0855098	-0.0430881	0.0424217	0.624584	0.950221	0.285725	0.486967	0.201242	0.109319	0.512285
SELPLG	-0.102096	-0.0217398	0.0803563	0.130594	0.323407	-0.0538757	-0.105878	-0.0520022	0.68113	0.958743	-0.230672	-0.219072	0.0116004	0.849289	0.952479
PDHB	0.121572	-0.106713	-0.228285	0.130594	0.323407	0.149714	-0.00751681	-0.157231	0.0483847	0.818777	0.0758736	0.0182771	-0.0575965	0.180088	0.589837
TM6SF1	-0.0590004	-0.127866	-0.0688655	0.130594	0.323407	-0.0368755	-0.0798159	-0.0429404	0.316299	0.874271	0.141095	0.0646592	-0.076436	0.611998	0.865435
LOC645128	-0.0156125	0.0830073	0.0986199	0.130594	0.323407	-0.0425227	0.00705907	0.0495818	0.570107	0.931623	-0.143638	0.0745087	0.218147	0.0669622	0.474341
PTMA	0.0930577	-0.0996498	-0.192707	0.130594	0.323407	0.0947691	-0.00303837	-0.0978075	0.570107	0.931623	0.178697	-0.00433398	-0.183031	0.116762	0.523025
PSME2	0.739386	0.510263	-0.229122	0.130594	0.323407	0.227195	-0.027159	-0.254354	0.0165874	0.682773	0.0771093	-0.150199	-0.227308	0.5258	0.830699
GTF2IP1	0.103283	-0.0093266	-0.112609	0.130594	0.323407	-0.0716089	-0.0475329	0.024076	0.492781	0.927696	-0.0411743	-0.0227648	0.0184095	0.727457	0.902948
NUBPL	-0.0396255	0.078039	0.117665	0.130594	0.323407	0.0308464	-0.171479	-0.202325	0.200105	0.846944	-0.0725747	-0.120883	-0.0483085	0.899199	0.967831
LOC134997	-0.0212173	-0.12311	-0.101893	0.130594	0.323407	0.132491	0.112009	-0.0204823	0.517936	0.931623	0.102597	-0.211903	-0.3145	0.0147214	0.39589
FLOT1	-0.0794445	0.0755967	0.155041	0.139446	0.332357	-0.152654	-0.31925	-0.166596	0.22967	0.846944	-0.138422	-0.120867	0.0175556	0.680367	0.896366
FAF2	0.168737	0.0667757	-0.101961	0.139446	0.332357	0.0510555	0.101207	0.050152	0.799303	0.976213	0.131436	0.0812474	-0.050189	0.849289	0.952479
CYORF15A	-0.0343817	-0.148831	-0.114449	0.139446	0.332357	0.036903	0.0602837	0.0233807	0.624584	0.950221	0.0771572	0.128542	0.0513849	0.634461	0.876846
MKRN1	-0.0428865	0.0745844	0.117471	0.139446	0.332357	-0.148969	0.0218802	0.170849	0.262117	0.864679	-0.0796945	0.248282	0.327976	0.0194766	0.39589
SNAPC4	-0.0701784	0.0311916	0.10137	0.139446	0.332357	-0.0820581	0.0670647	0.149123	0.0533007	0.841935	-0.0977834	0.00382125	0.101605	0.680367	0.896366
TREM1	0.0869028	-0.12466	-0.211563	0.139446	0.332357	-0.104546	-0.259256	-0.15471	0.070508	0.841935	0.0031423	-0.0262779	-0.0294202	0.703774	0.899201
PTPLAD2	-0.0469016	0.0821587	0.12906	0.139446	0.332357	-0.0409718	-0.0264125	0.0145593	0.652614	0.950221	-0.140287	0.0115722	0.15186	0.180088	0.589837
ANXA3	0.088246	-0.017501	-0.105747	0.139446	0.332357	0.0298237	-0.11606	-0.145883	0.160975	0.842492	-0.0109515	0.00769093	0.0186424	0.634461	0.876846
ATP6AP1	-0.095383	0.156466	0.251849	0.139446	0.332357	-0.070331	0.19079	0.261121	0.22967	0.846944	-0.112529	0.141119	0.253648	0.00811266	0.39589
AQP9	-0.0610606	-0.11446	-0.0533996	0.139446	0.332357	-0.246783	-0.308748	-0.0619656	0.570107	0.931623	-0.185869	0.0678317	0.2537	0.446115	0.772962
PTGES3	0.117035	-0.0321005	-0.149135	0.139446	0.332357	-0.00321318	0.0432321	0.0464453	0.543719	0.931623	0.0678071	0.0452694	-0.0225377	0.356674	0.722359
MAP3K1	-0.0717726	-0.159355	-0.0875821	0.139446	0.332357	-0.123453	-0.053094	0.0703592	0.262117	0.864679	0.0165017	0.00821639	-0.00828527	0.5258	0.830699
IRF9	0.541162	0.321327	-0.219835	0.139446	0.332357	0.0312102	-0.0665714	-0.0977816	0.149269	0.842492	-0.18387	-0.185342	-0.00147185	0.79996	0.93074
HLA-DRB4	0.25272	0.134152	-0.118568	0.139446	0.332357	0.111407	0.0907461	-0.0206613	0.468278	0.920241	-0.0571883	0.0323326	0.0895209	0.37362	0.733278
CD63	0.0302921	0.135406	0.105114	0.139446	0.332357	-0.00993075	-0.0178827	-0.00795193	0.73947	0.97592	-0.0780192	0.0239123	0.101932	0.340207	0.722359
ANPEP	-0.232317	-0.100211	0.132106	0.139446	0.332357	-0.258545	0.14247	0.401016	0.138203	0.841935	-0.252909	-0.104235	0.148674	0.0388865	0.43989
ARL6IP5	0.132326	-0.0370052	-0.169331	0.139446	0.332357	0.330512	-0.140648	-0.47116	0.117927	0.841935	0.281319	0.134303	-0.147016	0.141418	0.569788
FLJ12078	-0.0416346	0.023215	0.0648496	0.139446	0.332357	-0.000364839	-0.0137001	-0.0133353	0.769219	0.976213	-0.0662745	-0.0540348	0.0122397	0.775571	0.918503
FKBP5	0.192034	-0.0156023	-0.207636	0.139446	0.332357	0.154479	0.127511	-0.0269679	0.73947	0.97592	0.108411	0.11627	0.00785916	0.79996	0.93074
LOC731682	0.0902025	0.0254272	-0.0647753	0.139446	0.332357	0.0291999	-0.038411	-0.0676109	0.22967	0.846944	0.0352396	-0.00143815	-0.0366777	0.25157	0.658318
LMO2	0.197095	0.104333	-0.0927621	0.139446	0.332357	0.124752	-0.0220296	-0.146781	0.186379	0.846944	0.221261	0.0760875	-0.145173	0.874183	0.96198
TNS1	0.0125075	0.1632	0.150693	0.139446	0.332357	-0.0960077	-0.00376809	0.0922396	0.984401	1	-0.244388	0.0955174	0.339905	0.0831389	0.485136
OR2W3	0.00370085	0.0481104	0.0444095	0.139446	0.332357	-0.0998516	-0.0290409	0.0708107	0.245529	0.851802	-0.0944025	-0.029864	0.0645385	0.169772	0.581041
CCDC23	-0.103295	-0.000980955	0.102314	0.139446	0.332357	0.0100319	-0.0739743	-0.0840062	0.799303	0.976213	0.0270111	-0.100814	-0.127825	0.589885	0.862183
UBIAD1	0.0868023	0.02351	-0.0632923	0.148739	0.345319	0.0917212	-0.0553615	-0.147083	0.117927	0.841935	0.0703972	-0.0256517	-0.0960489	0.0774362	0.485136
LOC648000	0.106903	-0.255253	-0.362156	0.148739	0.345319	0.466811	0.314827	-0.151985	0.597071	0.93843	0.8949	0.711178	-0.183722	0.213737	0.618861
ZFP36L1	0.188517	-0.0376684	-0.226186	0.148739	0.345319	-0.0230503	-0.0453676	-0.0223173	0.17334	0.846944	0.113359	0.211777	0.0984186	0.324223	0.714605
NKG7	-0.21011	0.0788057	0.288916	0.148739	0.345319	0.22332	0.0889083	-0.134412	0.68113	0.958743	-0.195274	-0.0452619	0.150012	0.611998	0.865435
KIAA0513	0.0436767	0.231804	0.188127	0.148739	0.345319	-0.132491	-0.0530277	0.0794635	0.444443	0.91595	-0.226657	0.0268711	0.253528	0.0147214	0.39589
MCM8	0.0122164	0.0478947	0.0356783	0.148739	0.345319	0.0439301	0.00804048	-0.0358896	0.444443	0.91595	-0.0717982	0.0641681	0.135966	0.0388865	0.43989
TEF	-0.0213353	0.0629966	0.0843319	0.148739	0.345319	-0.146373	-0.0538568	0.092516	0.891131	0.988487	-0.0874843	-0.0413221	0.0461623	0.159895	0.571642
MBOAT7	-0.0359644	0.202189	0.238153	0.148739	0.345319	-0.440492	-0.0973311	0.343161	0.0643409	0.841935	-0.224171	-0.0728926	0.151279	0.141418	0.569788
SUMO2	0.0487954	-0.00415234	-0.0529477	0.148739	0.345319	0.0436871	0.0403369	-0.00335018	0.891131	0.988487	0.10621	0.072677	-0.0335333	0.202063	0.604601
RPS3	-0.237488	-0.0431116	0.194376	0.148739	0.345319	-0.0427173	0.0956008	0.138318	0.218456	0.846944	0.0631577	0.0646381	0.00148033	0.82454	0.942774
LOC644774	0.0289068	-0.0469479	-0.0758547	0.148739	0.345319	-0.0721572	-0.13264	-0.0604829	0.297499	0.864679	0.0101869	-0.0939027	-0.10409	0.190849	0.599306
TBC1D14	-0.122442	-0.00772104	0.114721	0.148739	0.345319	-0.100395	-0.0510982	0.0492966	0.624584	0.950221	-0.180568	-0.0170462	0.163521	0.169772	0.581041
SF3B3	0.039866	0.0647674	0.0249013	0.148739	0.345319	-0.0188951	0.126114	0.145009	0.138203	0.841935	-0.0914551	0.0597708	0.151226	0.190849	0.599306
ADA	-0.0685079	0.0357858	0.104294	0.148739	0.345319	0.172436	0.15742	-0.0150156	0.492781	0.927696	-0.056733	-0.116957	-0.0602238	0.446115	0.772962
HLA-DQA1	0.280332	0.067791	-0.212541	0.148739	0.345319	0.0762683	0.0682214	-0.00804689	0.710093	0.971673	-0.0139372	0.0885076	0.102445	0.391043	0.746314
DEF6	-0.124807	0.00811686	0.132923	0.148739	0.345319	-0.0812128	-0.0223237	0.0588891	0.245529	0.851802	-0.0448478	-0.0349129	0.00993488	0.568138	0.848307
STXBP2	0.0499158	0.215407	0.165492	0.148739	0.345319	-0.0604433	-0.039715	0.0207283	0.73947	0.97592	-0.25711	-0.151479	0.105631	0.202063	0.604601
STAT5B	-0.205668	-0.0504513	0.155217	0.158483	0.361874	-0.212793	-0.0968045	0.115988	0.214532	0.846944	-0.217112	-0.166603	0.0505092	0.0534075	0.459546
SNW1	0.07498	0.0235363	-0.0514437	0.158483	0.361874	0.0196683	-0.0555631	-0.0752313	0.0918579	0.841935	0.00275133	-0.0450127	-0.047764	0.446115	0.772962
ZNF14	-0.0877078	-0.021185	0.0665228	0.158483	0.361874	-0.10907	-0.0817761	0.0272935	0.377121	0.880912	-0.0842003	-0.0423492	0.0418511	0.703774	0.899201
IFP38	0.0619418	-0.169534	-0.231475	0.158483	0.361874	0.0524694	-0.0766435	-0.129113	0.297499	0.864679	0.102319	-0.0572097	-0.159528	0.00530138	0.39589
TP53INP1	-0.0247329	-0.163224	-0.138491	0.158483	0.361874	-0.0311041	-0.0790618	-0.0479577	0.769219	0.976213	0.0656623	0.0540956	-0.0115667	0.546771	0.838603
NPC2	0.513275	0.369414	-0.143861	0.158483	0.361874	0.0921161	0	-0.0921161	0.058612	0.841935	-0.0131044	0.00974146	0.0228458	0.874183	0.96198
FCGR3B	0.217072	0.0879601	-0.129112	0.158483	0.361874	-0.0429108	-0.205633	-0.162722	0.543719	0.931623	0.0147129	-0.0113068	-0.0260197	0.703774	0.899201
EIF4E2	0.0267103	0.127885	0.101175	0.158483	0.361874	0.0206194	0.0292176	0.00859826	0.953226	0.997776	-0.136363	-0.082284	0.0540787	0.727457	0.902948
GANAB	-0.0594317	0.0339537	0.0933853	0.158483	0.361874	0.00157358	-0.0596281	-0.0612017	0.953226	0.997776	-0.0450554	-0.0470797	-0.00202423	0.427297	0.763818
DOK2	0.0426927	0.0308755	-0.0118172	0.158483	0.361874	0.0203597	-0.0168751	-0.0372348	0.22967	0.846944	0.0227361	-0.0526227	-0.0753588	0.159895	0.571642
PLIN5	-0.214568	-0.0177507	0.196817	0.158483	0.361874	-0.0741819	-0.0654254	0.00875654	0.769219	0.976213	-0.105335	-0.0707446	0.03459	0.427297	0.763818
HLA-DQB1	0.0036508	0.145064	0.141413	0.16869	0.377816	-0.00892681	-0.0557447	-0.0468179	0.799303	0.976213	-0.00389153	0.00523787	0.0091294	0.680367	0.896366
DYNLT1	0.2359	0.020663	-0.215237	0.16869	0.377816	0.0939165	-0.0805941	-0.174511	0.186379	0.846944	0.0280963	0.0488779	0.0207816	0.703774	0.899201
LOC402251	-0.00457011	-0.41384	-0.40927	0.16869	0.377816	0.0976277	-0.068009	-0.165637	0.517936	0.931623	0.247367	-0.0138825	-0.261249	0.293709	0.683974
LOC646849	0.0412396	-0.071931	-0.113171	0.16869	0.377816	0.0244903	0.0855299	0.0610396	0.710093	0.971673	0.141975	0.0567397	-0.0852354	0.190849	0.599306
PRAM1	0.0344706	0.114269	0.0797985	0.16869	0.377816	-0.0362721	-0.00112818	0.035144	0.922122	0.992503	-0.167086	-0.158149	0.00893727	0.680367	0.896366
RNF24	-0.191288	0.0378485	0.229137	0.16869	0.377816	-0.435585	-0.284562	0.151023	0.597071	0.93843	-0.430131	-0.19846	0.231671	0.356674	0.722359
DECR1	0.304243	0.184486	-0.119757	0.16869	0.377816	0.0193535	0.00596086	-0.0133927	0.468278	0.920241	0.137062	-0.0454513	-0.182513	0.0831389	0.485136
GRAMD1A	-0.0295628	0.0733089	0.102872	0.16869	0.377816	-0.00802221	-0.0270062	-0.018984	1	1	-0.0356192	-0.00715427	0.0284649	0.408937	0.756757
LOC730740	-0.0462091	0.198462	0.244671	0.16869	0.377816	-0.199864	-0.114386	0.085478	0.398851	0.886789	-0.125506	0	0.125506	0.27918	0.670647
BHLHB2	0.0874651	-0.09255	-0.180015	0.16869	0.377816	-0.0684613	-0.0760326	-0.00757124	0.891131	0.988487	0.0220363	0.0424119	0.0203756	0.949501	0.984405
EML3	-0.214569	-0.030785	0.183784	0.16869	0.377816	-0.187407	-0.00467469	0.182732	0.149269	0.842492	-0.149007	-0.0691237	0.0798834	0.391043	0.746314
C3ORF31	0.0441413	-0.0919183	-0.13606	0.16869	0.377816	0.0348353	-0.0389866	-0.0738219	0.335838	0.874328	-0.0373269	-0.0454809	-0.00815396	0.546771	0.838603
HS.561747	-0.0218496	-0.142052	-0.120202	0.16869	0.377816	-0.0564521	-0.0345597	0.0218924	0.652614	0.950221	0.0335446	0.0112421	-0.0223026	0.703774	0.899201
Septin 6	-0.117349	-0.041977	0.0753722	0.179368	0.393062	-0.0836552	-0.00720224	0.0764529	0.0771358	0.841935	-0.145069	-0.123766	0.0213038	0.680367	0.896366
LCP1	0.299909	0.15138	-0.148528	0.179368	0.393062	0.0170698	0.0227791	0.0057093	0.829677	0.981817	-0.0343386	-0.0211819	0.0131568	0.634461	0.876846
SLA	0.177386	0.0168105	-0.160576	0.179368	0.393062	0.0741146	-0.0812273	-0.155342	0.0165874	0.682773	-0.031998	0.112172	0.14417	0.82454	0.942774
LOC644799	0.0229262	-0.0469215	-0.0698477	0.179368	0.393062	0.0741437	0.0491992	-0.0249445	0.799303	0.976213	0.158351	0.125768	-0.0325836	0.680367	0.896366
TNIP1	-0.0413596	0.0966997	0.138059	0.179368	0.393062	-0.10116	-0.05227	0.0488898	0.377121	0.880912	-0.109438	-0.0700114	0.0394262	0.27918	0.670647
ARHGAP1	-0.0212695	0.0661965	0.087466	0.179368	0.393062	0.0450611	0.01766	-0.027401	0.891131	0.988487	-0.100262	-0.0360976	0.0641641	0.159895	0.571642
XAF1	0.469626	0.280424	-0.189202	0.179368	0.393062	0.038721	0.0125709	-0.0261501	0.108678	0.841935	0.0209756	-0.0417368	-0.0627124	0.180088	0.589837
GTF2A2	0.128722	0.0169488	-0.111773	0.179368	0.393062	0.129968	0.00607256	-0.123896	0.356113	0.880912	0.105662	0.0201375	-0.085525	0.0233228	0.39589
NOSIP	-0.346663	-0.116892	0.229771	0.179368	0.393062	-0.00197087	0.134567	0.136538	0.570107	0.931623	0.0153548	-0.0140381	-0.0293928	0.899199	0.967831
ZMIZ1	0.054425	-0.141522	-0.195947	0.179368	0.393062	-0.10853	0.0585721	0.167102	0.922122	0.992503	0.0259109	0.0980979	0.0721871	0.340207	0.722359
CCL5	-0.251431	-0.115377	0.136054	0.179368	0.393062	0.0364351	0.0422214	0.00578634	0.68113	0.958743	0.00636086	-0.0550817	-0.0614425	0.727457	0.902948
SLC43A2	0.0495051	0.328796	0.279291	0.179368	0.393062	-0.214743	0.0716189	0.286362	0.0918579	0.841935	-0.0276895	0.138628	0.166317	0.0358174	0.43989
LOC644511	-0.35551	-0.0868404	0.268669	0.179368	0.393062	-0.0353347	0.172048	0.207383	0.160975	0.842492	0.205785	0.154096	-0.0516889	0.874183	0.96198
ZNF486	-0.155851	0.0114967	0.167348	0.179368	0.393062	0.0200474	0.0733577	0.0533103	0.517936	0.931623	-0.0762513	0.0412468	0.117498	0.109319	0.512285
TMEM126A	-0.0403173	-0.0719229	-0.0316056	0.179368	0.393062	0.074739	0.057547	-0.0171919	0.68113	0.958743	0.162349	0.0228378	-0.139511	0.0831389	0.485136
JTB	-0.038491	-0.0521239	-0.0136328	0.182392	0.399113	0.079304	-0.0374685	-0.116772	0.0994603	0.841935	0.0569952	-0.0722979	-0.129293	0.0168179	0.39589
HSPA1B	0.143178	-0.00676502	-0.149943	0.190527	0.405835	-0.0408537	-0.00375412	0.0370996	0.624584	0.950221	-0.0243789	0.0456395	0.0700184	0.356674	0.722359
AMY1C	0.140509	-0.0289632	-0.169472	0.190527	0.405835	0.155603	0.0275336	-0.12807	0.570107	0.931623	0.160108	0.12498	-0.035128	0.546771	0.838603
COX10	-0.0805083	0.0631026	0.143611	0.190527	0.405835	-0.0328591	0.0177036	0.0505627	0.186379	0.846944	-0.145572	0.0289288	0.174501	0.180088	0.589837
PECAM1	-0.133658	-0.0147281	0.11893	0.190527	0.405835	-0.173842	-0.0921058	0.0817366	0.492781	0.927696	-0.106422	-0.00248891	0.103934	0.408937	0.756757
LOC440359	-0.0656527	0.218471	0.284123	0.190527	0.405835	-0.0394317	0.0170205	0.0564522	0.517936	0.931623	-0.0547743	0.373165	0.427939	0.0774362	0.485136
ELANE	-0.0483583	-0.0376185	0.0107398	0.190527	0.405835	-0.137913	0.0398194	0.177732	0.245529	0.851802	0.0651974	-0.0938612	-0.159059	0.899199	0.967831
PITPNM2	-0.0765639	0.139886	0.21645	0.190527	0.405835	-0.083781	-0.0954969	-0.0117158	0.829677	0.981817	-0.153862	-0.0836539	0.0702085	0.874183	0.96198
S100A11	-0.074436	0.173519	0.247955	0.190527	0.405835	-0.130156	-0.176745	-0.0465891	0.799303	0.976213	-0.241537	-0.119381	0.122157	0.657257	0.88978
FTHL12	0.155765	-0.039025	-0.19479	0.190527	0.405835	0.000957324	-0.191151	-0.192108	0.492781	0.927696	-0.0224595	-0.115491	-0.0930318	0.899199	0.967831
SAP30L	0.021682	0.0367523	0.0150702	0.190527	0.405835	0.0540904	-0.0203528	-0.0744432	0.070508	0.841935	0.0215664	-0.063506	-0.0850724	0.427297	0.763818
PABPC1	-0.0637913	-0.119376	-0.0555847	0.190527	0.405835	-0.0540294	-0.0263512	0.0276782	0.922122	0.992503	0.0551761	-0.0455341	-0.10071	0.324223	0.714605
HIST2H2AC	0.0277243	0.169366	0.141642	0.190527	0.405835	-0.210694	-0.0716175	0.139077	0.922122	0.992503	-0.0887967	-0.168886	-0.0800891	0.874183	0.96198
LMAN2	-0.0526703	0.0324684	0.0851387	0.190527	0.405835	-0.0975028	0.0178164	0.115319	0.127763	0.841935	-0.0554101	-0.0298383	0.0255718	0.356674	0.722359
ZCCHC6	0.0596842	0.0174932	-0.042191	0.190527	0.405835	0.0404254	0.00828823	-0.0321372	0.984401	1	-0.0124834	0.0402045	0.0526878	0.611998	0.865435
LOC390530	0.0295179	0.00800409	-0.0215138	0.190527	0.405835	0.0796781	0.0125779	-0.0671001	0.297499	0.864679	0.0576145	0.0586464	0.0010319	1	1
CAPZB	0.0326366	0.0537094	0.0210728	0.190527	0.405835	-0.0560749	0.0446452	0.10072	0.517936	0.931623	-0.0927172	-0.113982	-0.0212652	0.657257	0.88978
ITFG3	-0.0331093	0.0803187	0.113428	0.190527	0.405835	0.0383348	-0.0764683	-0.114803	0.468278	0.920241	-0.160047	-0.112334	0.0477131	0.465384	0.787534
HS.171171	-0.138089	0.0902541	0.228343	0.190527	0.405835	-0.227178	-0.118595	0.108582	0.73947	0.97592	-0.254903	-0.214403	0.0404995	0.427297	0.763818
CHES1	0.0542372	-0.0485091	-0.102746	0.190527	0.405835	-0.0166475	0.0569308	0.0735783	0.891131	0.988487	-0.0804746	-0.00679962	0.073675	0.427297	0.763818
LOC90586	-0.079732	-0.00567684	0.0740551	0.202173	0.421218	-0.0695631	-0.0642642	0.00529888	0.799303	0.976213	-0.0882387	-0.0924777	-0.00423902	0.727457	0.902948
HSD17B7	-0.0856463	-0.0675334	0.0181129	0.202173	0.421218	0.0443323	-0.0799044	-0.124237	0.421297	0.90244	-0.168642	-0.231237	-0.0625956	0.974738	0.995658
PEBP1	0.026468	-0.0574387	-0.0839067	0.202173	0.421218	0.0786649	0.0394171	-0.0392478	0.117927	0.841935	0.229764	-0.0502616	-0.280026	0.00899067	0.39589
TAGLN2	-0.056685	0.0386216	0.0953066	0.202173	0.421218	-0.21823	-0.164295	0.0539344	0.570107	0.931623	-0.269953	-0.144409	0.125544	0.0329517	0.428935
NCF1	0.411405	0.220336	-0.191068	0.202173	0.421218	0.00655707	-0.258641	-0.265198	0.245529	0.851802	-0.0823887	-0.28748	-0.205091	0.27918	0.670647
PSMA6	0.0606592	-0.00982488	-0.070484	0.202173	0.421218	0.173769	0.214126	0.0403567	0.543719	0.931623	0.404781	0.177449	-0.227332	0.0774362	0.485136
TBCA	0.162337	-0.0479778	-0.210315	0.202173	0.421218	0.159815	0.134134	-0.0256812	0.829677	0.981817	0.086701	0.0566121	-0.0300889	0.427297	0.763818
BSDC1	-0.143665	-0.0196484	0.124017	0.202173	0.421218	0.018075	-0.025481	-0.043556	0.891131	0.988487	-0.111162	-0.0505158	0.0606464	0.703774	0.899201
C8ORF45	0.00622834	0.0616435	0.0554152	0.202173	0.421218	-0.0210085	-0.0218338	-0.000825351	0.799303	0.976213	-0.0459695	-0.0787425	-0.032773	0.899199	0.967831
NDE1	-0.0803432	0.0816136	0.161957	0.202173	0.421218	-0.131723	-0.166296	-0.0345733	0.421297	0.90244	-0.322039	-0.29875	0.0232888	0.568138	0.848307
LOC654055	0.00436378	0.0541002	0.0497364	0.202173	0.421218	-0.0675913	-0.0178271	0.0497642	0.597071	0.93843	-0.0150278	0.0197565	0.0347843	0.169772	0.581041
NECAP2	0.0470178	0.174787	0.127769	0.202173	0.421218	0.0660752	0.0350844	-0.0309908	0.922122	0.992503	-0.0109639	-0.0136365	-0.0026726	0.505237	0.815988
ACTB	0.102765	-0.0766554	-0.179421	0.202173	0.421218	0.0530026	-0.0640913	-0.117094	0.398851	0.886789	0.0152528	-0.0880511	-0.103304	0.874183	0.96198
SOX4	-0.000869204	-0.00155444	-0.000685233	0.202173	0.421218	9.85248e-05	0.0283615	0.028263	1	1	0.112718	0.00142025	-0.111298	0.0456765	0.450689
HLA-DRB6	0.133616	0.23717	0.103555	0.202173	0.421218	0.0358844	0.0152197	-0.0206646	0.891131	0.988487	0.0347084	0.14587	0.111162	0.324223	0.714605
NCF1C	0.0638033	0.357944	0.294141	0.202173	0.421218	-0.249462	-0.216053	0.033409	0.769219	0.976213	-0.265818	-0.281886	-0.0160681	0.974738	0.995658
PTPRC	0.0695273	-0.0170105	-0.0865378	0.214316	0.435786	-0.0364915	0.00321685	0.0397083	0.73947	0.97592	0.0149781	0.0225883	0.00761018	0.775571	0.918503
TGFBI	0.0643685	-0.156983	-0.221351	0.214316	0.435786	0.219528	-0.0221185	-0.241646	0.0842449	0.841935	-0.0335424	-0.164147	-0.130604	0.37362	0.733278
WDR6	-0.22669	-0.155044	0.0716452	0.214316	0.435786	-0.0315741	0.0574992	0.0890732	0.22967	0.846944	-0.123857	-0.0861387	0.0377178	1	1
CD247	-0.0278359	-0.281921	-0.254085	0.214316	0.435786	0.193593	-0.0437619	-0.237355	1	1	0.0429791	0.171246	0.128266	0.680367	0.896366
ORM1	-0.169817	-0.0567499	0.113068	0.214316	0.435786	-0.472955	-0.137925	0.335031	0.316299	0.874271	-0.310978	-0.170711	0.140267	0.265134	0.667436
FHL3	-0.0202006	0.055381	0.0755816	0.214316	0.435786	-0.0242096	-0.0139066	0.010303	0.68113	0.958743	-0.111161	-0.112817	-0.00165618	0.324223	0.714605
DUSP19	-0.243765	0.0172028	0.260967	0.214316	0.435786	-0.0408152	-0.0724129	-0.0315977	0.984401	1	-0.37651	-0.0355684	0.340941	0.190849	0.599306
FAM65B	0.171235	0.00356097	-0.167674	0.214316	0.435786	-0.0322497	-0.0907642	-0.0585144	0.984401	1	0.044082	0.0903204	0.0462384	0.751397	0.91331
GHITM	0.0450133	-0.0450321	-0.0900453	0.214316	0.435786	-0.0277119	0.0063672	0.0340791	0.829677	0.981817	0.0392813	0.212686	0.173405	0.924313	0.978949
LOC646200	0.0628429	-0.189132	-0.251975	0.214316	0.435786	0.1855	0.326824	0.141324	0.891131	0.988487	0.216603	0.242323	0.0257203	0.703774	0.899201
SIK3	-0.068693	0.0461106	0.114804	0.214316	0.435786	-0.159273	-0.112861	0.0464124	0.335838	0.874328	-0.169808	-0.00670607	0.163102	0.0576534	0.469552
LAPTM4A	0.0600289	-0.0437264	-0.103755	0.214316	0.435786	0.0895284	-0.0132812	-0.10281	0.710093	0.971673	-0.0168829	-0.0221651	-0.00528217	0.727457	0.902948
ITGAL	-0.00842466	0.0470376	0.0554623	0.214316	0.435786	0.00516559	0.104428	0.099262	0.316299	0.874271	-0.115246	-0.0786865	0.0365592	0.485095	0.803917
RPS6KA4	-0.0227025	0.108467	0.13117	0.214316	0.435786	0.11995	-0.049573	-0.169523	0.0842449	0.841935	-0.0350195	-0.0438961	-0.00887667	0.775571	0.918503
CANX	0.0762948	0.037939	-0.0383557	0.214316	0.435786	0.0347113	0.0878412	0.05313	0.517936	0.931623	0.0312531	0.0330556	0.00180247	0.899199	0.967831
FLJ38717	-0.0589213	0.00890641	0.0678277	0.214316	0.435786	-0.102907	-0.0501166	0.0527902	0.517936	0.931623	-0.0355163	0.0233602	0.0588765	0.180088	0.589837
SLC9A1	-0.0860405	0.0608448	0.146885	0.214316	0.435786	-0.110129	0.0839071	0.194036	0.099995	0.841935	-0.225695	-0.0536641	0.172031	0.0302791	0.411742
PPA1	0.337049	-0.103191	-0.44024	0.214316	0.435786	0.103739	-0.0792564	-0.182995	0.444443	0.91595	0.2308	0.00492099	-0.225879	0.0831389	0.485136
C5ORF21	-0.0449697	0.0187558	0.0637254	0.226961	0.451845	0.0497982	0.0896121	0.039814	0.517936	0.931623	0.106014	0.183571	0.0775575	0.116762	0.523025
LOC651149	-0.0731593	0.000958702	0.074118	0.226961	0.451845	-0.0214311	0.0352202	0.0566513	0.335838	0.874328	0.0293573	-0.0414935	-0.0708508	0.465384	0.787534
LEF1	-0.097117	-0.146273	-0.0491562	0.226961	0.451845	-0.00811378	0.119736	0.127849	0.444443	0.91595	0.172388	0.128025	-0.044363	0.546771	0.838603
PBX2	-0.0834664	0.0824032	0.16587	0.226961	0.451845	-0.135304	0.0767021	0.212006	0.0102144	0.642255	-0.0509099	-0.0177221	0.0331878	0.150446	0.571395
CMBL	0.0709917	-0.0294797	-0.100471	0.226961	0.451845	0.0134694	0.00274369	-0.0107258	0.262117	0.864679	0.00958013	0.0108701	0.00129	1	1
GSTM2	-0.0647372	-0.00453872	0.0601984	0.226961	0.451845	0.0115792	0.0549744	0.0433952	0.279439	0.864679	-0.0542471	-0.0243727	0.0298744	0.899199	0.967831
RPL14	-0.123319	-0.0493621	0.0739573	0.226961	0.451845	-0.0886703	0.020748	0.109418	0.356113	0.880912	0.013852	-0.0682796	-0.0821316	0.408937	0.756757
LOC643031	-0.0142179	0.150594	0.164812	0.226961	0.451845	0.0263019	0.121836	0.0955345	0.624584	0.950221	-0.207233	-0.0285294	0.178703	0.169772	0.581041
GSPT1	0.0474404	0.167998	0.120558	0.226961	0.451845	-0.115742	0.018595	0.134337	0.160975	0.842492	0.16465	0.437053	0.272403	0.0421693	0.43989
CPNE3	0.0080178	-0.11007	-0.118088	0.226961	0.451845	0.0792359	-0.039386	-0.118622	0.17334	0.846944	0.156371	0.0774825	-0.0788887	0.505237	0.815988
PRIC285	0.567816	0.411277	-0.156539	0.226961	0.451845	-0.0258853	-0.0163179	0.0095674	0.543719	0.931623	0.0134746	-0.105204	-0.118679	0.79996	0.93074
EPB41L4A	-0.0030384	-0.0140151	-0.0109767	0.226961	0.451845	-0.0521429	0.00761849	0.0597614	0.22967	0.846944	-0.000967988	-0.0224157	-0.0214477	0.899199	0.967831
PGM1	0.0241705	-0.0638294	-0.088	0.226961	0.451845	0.0189183	-0.0583037	-0.077222	0.316299	0.874271	-0.0633928	-0.0881606	-0.0247679	0.546771	0.838603
MED25	0.0696037	0.159582	0.0899783	0.226961	0.451845	-0.0862616	-0.0674035	0.018858	0.543719	0.931623	-0.17645	-0.0410792	0.135371	0.589885	0.862183
LOC439949	-0.0279271	-0.148849	-0.120922	0.226961	0.451845	0.0435105	0.102592	0.0590812	0.624584	0.950221	0.00984082	-0.0731282	-0.082969	0.356674	0.722359
ARPC1B	-0.0333837	0.0719836	0.105367	0.226961	0.451845	-0.126057	0.0480559	0.174113	0.262117	0.864679	-0.215202	0.0348958	0.250098	0.141418	0.569788
COX4I1	-0.159624	0.0546465	0.21427	0.240115	0.469441	-0.0690903	0.0545824	0.123673	0.214532	0.846944	0.0775713	0.0903071	0.0127358	0.589885	0.862183
MEGF9	0.0312888	0.0167746	-0.0145142	0.240115	0.469441	-0.0127956	-0.133075	-0.12028	0.043844	0.814322	-0.0879183	-0.0618447	0.0260736	0.874183	0.96198
LOC283953	-0.0150619	-0.0389908	-0.0239289	0.240115	0.469441	-0.0186649	0.0323228	0.0509877	0.377121	0.880912	0.0351809	-0.0416073	-0.0767883	0.159895	0.571642
DEFA1B	-0.236814	-0.198239	0.0385751	0.240115	0.469441	-0.169523	-0.262831	-0.0933084	0.517936	0.931623	-0.373738	-0.421646	-0.0479081	0.974738	0.995658
CREG1	-0.00953864	-0.0107875	-0.00124885	0.240115	0.469441	0.0318692	0.000772703	-0.0310965	0.335838	0.874328	0.0423143	0.0698242	0.0275099	0.446115	0.772962
LOC728481	0.165006	-0.125053	-0.290058	0.240115	0.469441	0.171992	0.0223821	-0.14961	0.860302	0.985143	0.00413936	-0.0575897	-0.061729	0.169772	0.581041
LOC644863	-0.0432179	-0.0650207	-0.0218028	0.240115	0.469441	0.0945354	-0.0377754	-0.132311	0.710093	0.971673	0.337311	0.171899	-0.165412	0.0955325	0.505194
GMDS	0.0266184	0.0979536	0.0713352	0.240115	0.469441	-0.00405378	0.0605873	0.0646411	0.624584	0.950221	0.00223842	0.0374368	0.0351983	0.611998	0.865435
CBL	0.0638942	0.00311023	-0.060784	0.240115	0.469441	-0.00130682	-0.0261061	-0.0247992	0.68113	0.958743	-0.0937052	-0.019849	0.0738562	0.427297	0.763818
STRAP	0.00865297	-0.0483399	-0.0569928	0.240115	0.469441	0.0103436	-0.0581461	-0.0684897	0.186379	0.846944	0.00658012	0.00354931	-0.0030308	0.37362	0.733278
PSMB8	0.213248	0.114357	-0.0988918	0.240115	0.469441	0.0292954	-0.044135	-0.0734305	0.22967	0.846944	0.061867	-0.0663022	-0.128169	0.0213265	0.39589
YY1	0.0853291	-0.0189672	-0.104296	0.240115	0.469441	-0.0265863	0.0144227	0.041009	0.570107	0.931623	0.0440446	0.0974734	0.0534287	0.703774	0.899201
DEFA3	-0.240337	-0.202981	0.0373554	0.240115	0.469441	-0.0756445	-0.160846	-0.0852012	0.652614	0.950221	-0.211837	-0.45991	-0.248073	0.924313	0.978949
MXD1	0.0125206	-0.203266	-0.215786	0.240115	0.469441	-0.11624	-0.234328	-0.118088	0.468278	0.920241	-0.031485	0.0115674	0.0430524	0.775571	0.918503
GTF3A	-0.227276	-0.345764	-0.118488	0.253781	0.481931	0.0653834	-0.0689521	-0.134336	0.335838	0.874328	0.165745	-0.195046	-0.360791	0.0213265	0.39589
SSH2	-0.0448159	0.0686636	0.113479	0.253781	0.481931	-0.176735	-0.0386081	0.138127	0.149269	0.842492	-0.271473	-0.139811	0.131662	0.159895	0.571642
JARID1D	-0.0716611	-0.0513571	0.020304	0.253781	0.481931	0.0118784	-0.00289021	-0.0147686	0.468278	0.920241	-0.0161483	-0.0597053	-0.043557	0.324223	0.714605
ADIPOR1	-0.0623116	0.131121	0.193433	0.253781	0.481931	-0.0171251	0.0218673	0.0389924	0.492781	0.927696	-0.124892	0.202682	0.327574	0.141418	0.569788
COMMD3	0.031516	-0.0807116	-0.112228	0.253781	0.481931	0.0892415	-0.00190856	-0.09115	0.68113	0.958743	0.429883	0.175709	-0.254174	0.0213265	0.39589
BLVRA	0.139387	0.0913917	-0.0479954	0.253781	0.481931	0.0926146	-0.00557601	-0.0981906	0.127763	0.841935	-0.0022265	0.000811775	0.00303827	0.79996	0.93074
HLA-DMA	0.15222	0.28072	0.1285	0.253781	0.481931	-0.0393481	0.152223	0.191571	0.17334	0.846944	-0.0181213	0.185039	0.20316	0.190849	0.599306
LOC613037	-0.0591148	-0.0233618	0.035753	0.253781	0.481931	-0.022652	0.0769464	0.0995984	0.444443	0.91595	-0.125151	-0.264058	-0.138907	0.446115	0.772962
PLEKHF1	-0.0799224	0.100142	0.180064	0.253781	0.481931	0.0904792	0.189325	0.0988457	0.377121	0.880912	0.00097692	-0.00472662	-0.00570354	0.949501	0.984405
LOC642103	0.0860448	0.0180808	-0.0679641	0.253781	0.481931	-0.0573778	-0.192092	-0.134715	0.492781	0.927696	-0.143725	-0.0467774	0.0969473	0.82454	0.942774
IL17RA	0.0467536	0.20324	0.156486	0.253781	0.481931	-0.0994947	-0.0260263	0.0734684	0.335838	0.874328	-0.149587	-0.146044	0.0035429	0.611998	0.865435
VDAC3	0.0268968	-0.118243	-0.14514	0.253781	0.481931	0.216506	0.0808851	-0.135621	0.22967	0.846944	0.115245	0.03588	-0.0793648	0.0576534	0.469552
WSB2	0.162825	0.0699204	-0.0929048	0.253781	0.481931	0.00131947	0.0473662	0.0460467	0.891131	0.988487	0.0386863	0.0373077	-0.00137857	0.974738	0.995658
HEBP2	0.0515706	-0.142095	-0.193666	0.253781	0.481931	-0.0278101	-0.155565	-0.127755	0.398851	0.886789	0.0494738	-0.0875221	-0.136996	0.0774362	0.485136
RPLP2	-0.0633142	0.0284487	0.0917629	0.253781	0.481931	-0.0415812	0	0.0415812	0.33031	0.874328	0	-0.0241982	-0.0241982	0.949501	0.984405
GUCA2A	-0.0347533	0.111523	0.146276	0.253781	0.481931	0.0551352	0.080907	0.0257717	0.922122	0.992503	-0.0603711	0.0629568	0.123328	0.150446	0.571395
PSMB1	0.0901722	0.0513154	-0.0388568	0.253781	0.481931	0.208772	0.15297	-0.0558015	0.860302	0.985143	0.196366	0.0373477	-0.159019	0.0669622	0.474341
VPS37C	0.104347	-0.0203915	-0.124739	0.253781	0.481931	-0.0414614	-0.168075	-0.126613	0.860302	0.985143	-0.126781	-0.0258189	0.100963	0.0669622	0.474341
LOC731878	0.129539	0.0231279	-0.106411	0.253781	0.481931	0.0984596	-0.0274553	-0.125915	0.186379	0.846944	-0.0364788	-0.134256	-0.0977772	0.485095	0.803917
SNORD13	-0.158725	-0.00627219	0.152452	0.253781	0.481931	0.0585116	0.065588	0.0070764	0.922122	0.992503	-0.215494	-0.0896955	0.125798	0.340207	0.722359
EIF2AK1	-0.016098	0.121217	0.137315	0.253781	0.481931	-0.0997752	0.0391401	0.138915	0.279439	0.864679	-0.0939235	0.112269	0.206192	0.0891672	0.497442
CTGLF3	-0.137897	-0.158174	-0.020277	0.253781	0.481931	-0.024332	-0.0136703	0.0106617	0.356113	0.880912	-0.0441433	-0.0263897	0.0177536	0.79996	0.93074
SRP14	0.0410163	-0.0670721	-0.108088	0.253781	0.481931	0.192874	0.297832	0.104958	0.953226	0.997776	0.432181	0.245695	-0.186486	0.37362	0.733278
HCG2P7	-0.0850565	-0.05083	0.0342265	0.267965	0.499523	0.0180485	-0.0065574	-0.0246059	0.860302	0.985143	-0.0842865	-0.160186	-0.0758995	0.974738	0.995658
GVIN1	0.0488482	-0.0284137	-0.0772618	0.267965	0.499523	0.153037	0.0190427	-0.133994	0.492781	0.927696	0.0740858	-0.103984	-0.17807	0.159895	0.571642
CTSD	-0.111136	-0.0175074	0.0936287	0.267965	0.499523	-0.131574	-0.0223222	0.109251	0.398851	0.886789	-0.227136	-0.165205	0.0619304	0.265134	0.667436
GLO1	0.0249094	-0.0961873	-0.121097	0.267965	0.499523	0.100376	-0.0590194	-0.159395	0.377121	0.880912	0.136317	-0.0576093	-0.193926	0.0194766	0.39589
GZMK	-0.302291	-0.0836953	0.218595	0.267965	0.499523	0.105237	-0.0123318	-0.117569	0.984401	1	0.208897	0.145455	-0.0634417	0.5258	0.830699
LILRA2	-0.091363	0.135762	0.227125	0.267965	0.499523	-0.197201	-0.0963842	0.100817	0.262117	0.864679	-0.0512836	0.178293	0.229577	0.0329517	0.428935
B2M	0.0250975	-0.058557	-0.0836545	0.267965	0.499523	0.0159928	0.0205306	0.00453781	0.984401	1	0.503879	0.181264	-0.322616	0.049419	0.450689
C10ORF58	-0.0357736	0.0504951	0.0862687	0.267965	0.499523	-0.000925383	0.0473858	0.0483112	0.543719	0.931623	-0.0331337	0.0667474	0.0998811	0.116762	0.523025
SORL1	0.0627132	0.185676	0.122963	0.267965	0.499523	-0.317676	0.0740673	0.391744	0.297499	0.864679	-0.447842	-0.0233134	0.424529	0.0576534	0.469552
UBB	0.0221959	0.126444	0.104248	0.267965	0.499523	-0.0834019	0.170062	0.253464	0.262117	0.864679	0.0457218	0.209806	0.164084	0.25157	0.658318
HHEX	0.0761061	-0.00492583	-0.081032	0.267965	0.499523	-0.085972	-0.135705	-0.0497331	0.68113	0.958743	0.0594103	0.0662209	0.00681062	0.849289	0.952479
MARS	-0.0227318	0.012924	0.0356558	0.267965	0.499523	-0.0750198	-0.022429	0.0525909	0.214532	0.846944	-0.0247572	-0.0131485	0.0116086	0.924313	0.978949
IFITM3	0.994063	0.718409	-0.275654	0.267965	0.499523	0.532075	-0.381838	-0.913913	0.00790993	0.602341	-0.153708	-0.477646	-0.323938	0.340207	0.722359
KCTD21	-0.0589652	0.052498	0.111463	0.267965	0.499523	-0.0125629	-0.0229282	-0.0103653	0.891131	0.988487	0.0239241	-0.0606052	-0.0845293	0.190849	0.599306
FCER1G	0.150274	0.056297	-0.0939771	0.267965	0.499523	0.0902632	-0.11652	-0.206783	0.099995	0.841935	-0.00581014	-0.217643	-0.211833	0.124586	0.542127
PSMB6	-0.0646788	0.0378709	0.10255	0.282669	0.515575	-0.08602	0.0636151	0.149635	0.138203	0.841935	-0.0944487	-0.00677782	0.0876708	0.899199	0.967831
IRF5	0.0922965	0.111965	0.0196685	0.282669	0.515575	-0.0015972	0.0427082	0.0443054	0.138203	0.841935	0.041299	0.0376798	-0.00361918	0.775571	0.918503
RALB	0.30878	0.0812547	-0.227526	0.282669	0.515575	-0.0365675	-0.200947	-0.164379	0.297499	0.864679	-0.13014	-0.0517839	0.0783558	0.974738	0.995658
CIB1	-0.0665749	0.0503595	0.116934	0.282669	0.515575	0.0636292	0.0305876	-0.0330416	0.891131	0.988487	0.0914457	0.0618639	-0.0295818	0.849289	0.952479
TNFRSF1A	0.128484	-0.0509136	-0.179398	0.282669	0.515575	-0.051555	-0.204945	-0.15339	0.444443	0.91595	-0.197056	-0.098325	0.0987308	0.324223	0.714605
KLHDC8B	0.0509636	0.153619	0.102656	0.282669	0.515575	-0.0185902	-0.0368114	-0.0182213	0.570107	0.931623	-0.182525	-0.0548698	0.127655	0.0669622	0.474341
FBXO6	0.465029	0.419942	-0.0450869	0.282669	0.515575	0.0859214	0.00587412	-0.0800473	0.245529	0.851802	-0.0308839	-0.041461	-0.0105771	0.924313	0.978949
SCO2	0.601798	0.479369	-0.122429	0.282669	0.515575	-0.107007	-0.0861948	0.020812	0.492781	0.927696	-0.142848	-0.190391	-0.0475432	0.82454	0.942774
WARS	1.0716	0.851291	-0.220309	0.282669	0.515575	0.0675746	-0.168722	-0.236297	0.160975	0.842492	-0.16459	-0.244106	-0.0795159	0.775571	0.918503
TACC1	0.0730583	-0.0129236	-0.0859819	0.282669	0.515575	0.10474	-0.100128	-0.204868	0.570107	0.931623	0.0280935	0.186801	0.158707	0.427297	0.763818
IMMT	0.0657294	-0.00152005	-0.0672495	0.282669	0.515575	0.101923	0.0235331	-0.0783899	0.297499	0.864679	0.0535696	0.0232288	-0.0303408	1	1
BLVRB	-0.0204851	0.144781	0.165266	0.282669	0.515575	-0.0829842	-0.0315396	0.0514446	1	1	0.0679267	0.0671305	-0.000796167	0.703774	0.899201
HS.208623	-0.004198	-0.0161745	-0.0119765	0.282669	0.515575	-0.0122687	0.00103041	0.0132991	0.543719	0.931623	0.0311918	-0.0154495	-0.0466412	0.0831389	0.485136
ISG15	0.323192	0.040177	-0.283015	0.282669	0.515575	0.183426	-0.134034	-0.317461	0.0483847	0.818777	-0.20431	-0.233784	-0.0294733	0.899199	0.967831
SYK	-0.0992203	0.0142536	0.113474	0.282669	0.515575	-0.154343	-0.029454	0.124889	0.570107	0.931623	-0.307177	-0.182472	0.124706	0.159895	0.571642
CD48	0.0560211	-0.132641	-0.188663	0.282669	0.515575	0.0680786	-0.0128237	-0.0809023	0.891131	0.988487	0.251595	0.0236714	-0.227923	0.0669622	0.474341
NDUFAB1	0.103393	-0.00196772	-0.10536	0.282669	0.515575	0.130569	0.0263415	-0.104227	0.316299	0.874271	0.118112	-0.0744062	-0.192518	0.116762	0.523025
MAL	-0.266984	-0.0341717	0.232813	0.282669	0.515575	-0.0944187	0.0252071	0.119626	0.108678	0.841935	0.0454988	0.0451114	-0.000387474	0.505237	0.815988
MED30	0.00519028	-0.0960551	-0.101245	0.297895	0.531258	0.0780236	-0.00517613	-0.0831997	0.517936	0.931623	0.213933	0.0516943	-0.162239	0.0669622	0.474341
MBP	-0.0795608	-0.0310499	0.0485108	0.297895	0.531258	-0.100381	-0.0567206	0.0436603	0.297499	0.864679	-0.182649	0.0170702	0.199719	0.109319	0.512285
LOC653232	-0.0809885	-0.0701214	0.0108671	0.297895	0.531258	-0.0211616	0.111694	0.132855	0.597071	0.93843	0.157906	0.0788632	-0.079043	0.568138	0.848307
ATP6V0B	-0.0476439	-0.00299614	0.0446477	0.297895	0.531258	-0.183483	-0.047103	0.13638	0.22967	0.846944	-0.128902	-0.0304401	0.0984617	0.391043	0.746314
PAFAH1B1	0.0346194	-0.0289728	-0.0635921	0.297895	0.531258	0.0123905	0.0499127	0.0375223	0.710093	0.971673	-0.0307359	0.164194	0.19493	0.265134	0.667436
HOXC10	0.0464	0.133356	0.0869556	0.297895	0.531258	-0.00908004	-0.0069065	0.00217354	0.710093	0.971673	-0.0310558	0.0917676	0.122823	0.546771	0.838603
S100A8	0.0512306	-0.113126	-0.164356	0.297895	0.531258	0.102429	0.314978	0.212549	0.984401	1	0.409444	0.112572	-0.296872	0.293709	0.683974
RNASE2	0.0705455	0.005534	-0.0650115	0.297895	0.531258	0.0264657	-0.0621297	-0.0885955	0.398851	0.886789	0.147352	-0.0849359	-0.232288	0.293709	0.683974
TMEM140	0.3434	0.257498	-0.0859014	0.297895	0.531258	-0.0374204	-0.282249	-0.244828	0.138203	0.841935	-0.0773785	-0.146706	-0.0693271	0.568138	0.848307
LOC730744	0.0302267	-0.141063	-0.17129	0.297895	0.531258	-0.186686	-0.0802552	0.106431	0.73947	0.97592	0.0268253	-0.0542098	-0.0810351	0.849289	0.952479
TMEM60	0.131045	-0.0159177	-0.146963	0.297895	0.531258	0.00799591	0.0825227	0.0745268	0.799303	0.976213	0.060532	0.0206673	-0.0398647	0.391043	0.746314
LOC647673	0.0161329	-0.0613151	-0.077448	0.297895	0.531258	0.152128	-0.000418796	-0.152547	0.245529	0.851802	0.206784	0.072925	-0.133859	0.213737	0.618861
YIF1B	-0.00321703	0.0132535	0.0164706	0.297895	0.531258	0.00502873	-0.0606793	-0.0657081	0.0533007	0.841935	-0.0715184	-0.0501259	0.0213925	0.589885	0.862183
ESYT1	-0.220007	0.011929	0.231936	0.297895	0.531258	-0.0641613	0.146589	0.210751	0.0918579	0.841935	-0.0537998	0.0488322	0.102632	0.132801	0.55872
LOC641705	0.00429422	0.0411545	0.0368603	0.297895	0.531258	-0.0304354	-0.00219265	0.0282428	0.769219	0.976213	0.0143505	-0.00511609	-0.0194666	0.680367	0.896366
RPS13	-0.260127	-0.0434673	0.21666	0.297895	0.531258	-0.0901886	0.0367354	0.126924	0.214532	0.846944	-0.0762638	-0.0283814	0.0478824	0.727457	0.902948
CD37	-0.0129867	0.0503343	0.063321	0.297895	0.531258	-0.0352529	-0.0752601	-0.0400072	0.984401	1	-0.124072	-0.227181	-0.103109	0.727457	0.902948
C12ORF57	-0.288556	-0.164299	0.124257	0.297895	0.531258	-0.0566754	0.0671957	0.123871	0.316299	0.874271	-0.0212363	0.109544	0.13078	0.751397	0.91331
EMR2	0.282634	-0.00353346	-0.286167	0.297895	0.531258	0.119442	-0.0623184	-0.18176	0.138203	0.841935	-0.188015	0.0108217	0.198837	0.37362	0.733278
GSDMD	0.184746	0.338441	0.153695	0.313645	0.549059	-0.154948	0.0509542	0.205902	0.127763	0.841935	0.019555	-0.0139313	-0.0334863	0.79996	0.93074
LOC389787	-0.0154637	-0.248361	-0.232897	0.313645	0.549059	0.00947079	-0.0542076	-0.0636784	0.953226	0.997776	0.473075	0.29485	-0.178225	0.27918	0.670647
LOC440704	-0.125924	-0.0209103	0.105013	0.313645	0.549059	-0.00441331	-0.0689894	-0.0645761	0.68113	0.958743	-0.263928	-0.11458	0.149348	0.169772	0.581041
ARHGDIB	0.0561023	-0.0235551	-0.0796574	0.309278	0.549059	-8.44184e-06	-0.0428053	-0.0427968	0.720879	0.97592	0.0478827	-0.0218655	-0.0697482	0.89784	0.967831
FAM26C	0.009715	0.0545213	0.0448063	0.313645	0.549059	-0.0837209	-0.0384385	0.0452824	0.22967	0.846944	-0.0662422	-0.0192322	0.0470099	0.727457	0.902948
ITGAM	0.119486	-0.0484105	-0.167896	0.313645	0.549059	-0.122663	-0.0254856	0.0971772	0.444443	0.91595	-0.018009	-0.064613	-0.0466039	0.924313	0.978949
LOC643949	-0.163714	-0.124631	0.0390832	0.313645	0.549059	-0.00953192	0.0773666	0.0868985	0.468278	0.920241	-0.087308	-0.0642574	0.0230506	0.680367	0.896366
LY6E	0.448018	0.205894	-0.242124	0.313645	0.549059	0.253689	-0.131683	-0.385372	0.00693677	0.586928	-0.00413936	-0.281544	-0.277405	0.124586	0.542127
TRIM58	0.209995	0.225714	0.0157187	0.313645	0.549059	-0.101195	0.157389	0.258583	0.245529	0.851802	-0.0444816	0.348825	0.393306	0.0254742	0.39589
C11ORF57	0.0153461	-0.0469822	-0.0623283	0.313645	0.549059	0.0381972	-0.0269945	-0.0651917	0.297499	0.864679	0.091955	-0.0589511	-0.150906	0.0456765	0.450689
CFD	0.10973	-0.0182682	-0.127999	0.313645	0.549059	0.183934	0.0352409	-0.148693	0.099995	0.841935	0.088718	-0.126125	-0.214843	0.391043	0.746314
CRISPLD2	0.127712	0.199283	0.0715708	0.313645	0.549059	-0.155915	-0.0947117	0.0612035	0.652614	0.950221	-0.273696	-0.0366131	0.237083	0.180088	0.589837
TMEM176A	0.0395451	0.1102	0.070655	0.313645	0.549059	0.0629951	-0.0432322	-0.106227	0.17334	0.846944	-0.0552998	0.0494068	0.104707	0.974738	0.995658
LOC653888	-0.0321749	0.0854681	0.117643	0.313645	0.549059	-0.163922	-0.0358384	0.128083	0.377121	0.880912	-0.187072	-0.107981	0.0790912	0.265134	0.667436
HS.213061	-0.12525	-0.164704	-0.0394538	0.313645	0.549059	-0.0315984	0.146471	0.178069	0.117927	0.841935	0.0807769	0.103638	0.0228613	0.727457	0.902948
MBD4	-0.0990465	-0.134197	-0.0351504	0.313645	0.549059	-0.0865727	-0.0231491	0.0634236	0.652614	0.950221	-0.222893	-0.171016	0.0518776	0.924313	0.978949
HMGB2	-0.0500291	-0.0733237	-0.0232945	0.329918	0.565839	0.00855618	0.0111602	0.00260404	0.421297	0.90244	0.13668	0.0550538	-0.0816264	0.0669622	0.474341
CCDC85B	0.00671787	-0.075792	-0.0825099	0.329918	0.565839	0.0101271	-0.0470481	-0.0571752	0.68113	0.958743	-0.078054	-0.110459	-0.0324047	0.446115	0.772962
CSF1R	0.131012	-0.0203751	-0.151387	0.329918	0.565839	0.474106	0.105437	-0.36867	0.22967	0.846944	0.0620808	0.0763522	0.0142714	0.391043	0.746314
FCER1A	0.102228	-0.210384	-0.312612	0.329918	0.565839	0.494263	0.159407	-0.334856	0.17334	0.846944	0.480769	0.236866	-0.243903	0.116762	0.523025
RPL6	0.0365252	-0.0759278	-0.112453	0.329918	0.565839	0.0572832	0.0886225	0.0313393	0.799303	0.976213	0.193427	-0.00920121	-0.202628	0.0955325	0.505194
GAL3ST4	-0.0674124	0.0206486	0.088061	0.329918	0.565839	0.0119522	0.0211419	0.00918975	0.297499	0.864679	-0.000540809	-0.0140257	-0.0134849	0.924313	0.978949
PSCD1	-0.0148644	-0.081207	-0.0663425	0.329918	0.565839	0.0301969	0.0228216	-0.00737531	0.769219	0.976213	-0.0739045	0.0430523	0.116957	0.727457	0.902948
VAMP2	-0.0375316	0.0404996	0.0780313	0.329918	0.565839	-0.0540315	0.0200374	0.0740689	0.468278	0.920241	-0.138445	-0.146733	-0.00828766	0.974738	0.995658
LOC728499	-0.216468	-0.0511729	0.165295	0.329918	0.565839	-0.0257786	0.121946	0.147725	0.377121	0.880912	0.0310291	-0.103422	-0.134451	0.874183	0.96198
CHX10	0.0291545	0.0274483	-0.00170623	0.329918	0.565839	-0.00578314	0.0288573	0.0346404	0.421297	0.90244	-0.057069	0.0100911	0.0671601	0.391043	0.746314
LOC650646	-0.153707	-0.0296639	0.124043	0.329918	0.565839	0.0876011	0.022087	-0.0655142	0.984401	1	0.167483	-0.037748	-0.205232	0.132801	0.55872
MXD4	-0.188753	-0.185774	0.00297871	0.329918	0.565839	0.11636	0.0370972	-0.079263	0.624584	0.950221	-0.00656989	-0.00553165	0.00103824	0.568138	0.848307
PIGX	-0.0608044	0.00220411	0.0630085	0.329918	0.565839	-0.023248	-0.0714085	-0.0481606	0.73947	0.97592	0.0118679	-0.0788212	-0.0906891	0.546771	0.838603
CENTD2	-0.00996397	-0.0185385	-0.00857455	0.329918	0.565839	-0.0615857	-0.0667991	-0.00521341	0.652614	0.950221	-0.0312297	-0.053603	-0.0223733	0.775571	0.918503
KCNJ10	0.0365637	0.0153148	-0.021249	0.329918	0.565839	-0.000163913	0.0351663	0.0353302	0.922122	0.992503	-0.0526819	0.0135287	0.0662106	0.408937	0.756757
FNBP4	-0.0385889	-0.202437	-0.163848	0.329918	0.565839	0.0627102	0.124918	0.0622074	0.652614	0.950221	0.0573449	0.114043	0.0566983	0.775571	0.918503
GZMB	-0.197598	-0.12003	0.0775681	0.329918	0.565839	0.0261384	-0.0956788	-0.121817	0.570107	0.931623	-0.15636	-0.107025	0.0493357	0.949501	0.984405
MSRA	-0.0290847	0.03405	0.0631347	0.329918	0.565839	-0.0688037	-0.0536992	0.0151045	0.710093	0.971673	-0.0517152	-0.08324	-0.0315248	0.546771	0.838603
IGSF6	0.00507938	0.223097	0.218017	0.346712	0.586063	-0.393489	-0.25082	0.142669	0.200105	0.846944	-0.260924	-0.286832	-0.0259081	0.5258	0.830699
NCKAP1L	0.160524	0.0584082	-0.102116	0.346712	0.586063	0.0612153	0.0200342	-0.0411811	0.953226	0.997776	0.0153823	-0.064205	-0.0795873	0.505237	0.815988
LOC728973	-0.0630122	-0.0788214	-0.0158092	0.346712	0.586063	0.135842	-0.042829	-0.178671	0.570107	0.931623	0.258966	-0.0524301	-0.311396	0.0109959	0.39589
C21ORF7	0.0689546	0.037774	-0.0311806	0.346712	0.586063	0.11777	0.00543934	-0.11233	0.922122	0.992503	0.38682	0.301835	-0.0849847	1	1
SEMA4A	0.00527256	0.269038	0.263765	0.346712	0.586063	-0.111207	-0.0218838	0.0893235	0.597071	0.93843	-0.203489	-0.113324	0.0901648	0.190849	0.599306
GNLY	-0.0932648	-0.00843203	0.0848328	0.346712	0.586063	0.126037	-0.000402215	-0.126439	0.624584	0.950221	-0.120745	-0.119617	0.00112777	0.775571	0.918503
LILRA5	-0.0882243	0.0280892	0.116314	0.346712	0.586063	-0.209723	-0.212809	-0.0030857	0.597071	0.93843	-0.164847	-0.155636	0.00921048	0.899199	0.967831
SEC14L1	0.146499	0.133524	-0.0129753	0.346712	0.586063	-0.204339	0.0179661	0.222305	0.22967	0.846944	-0.195578	-0.0100457	0.185532	0.0388865	0.43989
ATHL1	-0.137071	-0.0552878	0.0817833	0.346712	0.586063	-0.106034	0.0356703	0.141704	0.652614	0.950221	-0.187797	-0.362374	-0.174578	0.5258	0.830699
CLIC3	-0.115655	0.0575729	0.173227	0.346712	0.586063	0.0583584	-0.0106931	-0.0690515	0.710093	0.971673	-0.0819328	-0.117285	-0.0353522	1	1
DYSF	0.106978	0.352094	0.245117	0.346712	0.586063	-0.185417	-0.215486	-0.0300688	0.829677	0.981817	-0.507645	-0.352592	0.155054	0.324223	0.714605
MYCBP2	0.0555454	-0.00107369	-0.0566191	0.346712	0.586063	-0.0270991	0.00669916	0.0337983	0.922122	0.992503	-0.122822	0.00785913	0.130681	0.213737	0.618861
HS.550193	-0.0123737	0.141259	0.153633	0.346712	0.586063	-0.0679346	-0.0607512	0.00718339	0.984401	1	-0.116366	-0.0546313	0.0617351	0.049419	0.450689
LOC651738	0.0726182	-0.0134918	-0.0861101	0.364027	0.596142	-0.0680611	-0.126764	-0.0587033	0.597071	0.93843	-0.0225354	-0.0243069	-0.00177152	0.849289	0.952479
LOC283412	-0.1381	-0.0801168	0.057983	0.364027	0.596142	-0.138207	-0.0503751	0.0878323	0.953226	0.997776	0.00328604	-0.137106	-0.140393	0.25157	0.658318
LOC647340	-0.0787085	-0.0714219	0.00728657	0.364027	0.596142	0.266733	0.0758468	-0.190886	0.543719	0.931623	0.473754	0.287092	-0.186662	0.0669622	0.474341
MT2A	0.444802	0.462894	0.0180922	0.364027	0.596142	0.308048	-0.00989966	-0.317948	0.149269	0.842492	-0.140593	-0.194224	-0.0536314	0.899199	0.967831
LGALS2	0.0990278	0.0263313	-0.0726965	0.364027	0.596142	0.0447677	0.0342367	-0.010531	0.922122	0.992503	0.0213872	-0.0206728	-0.04206	0.485095	0.803917
JMJD8	-0.114964	0.0464332	0.161397	0.364027	0.596142	-0.0112144	0.120858	0.132072	0.160975	0.842492	-0.0404622	0.0121327	0.0525948	0.82454	0.942774
IL27RA	-0.0495491	-0.0538205	-0.0042714	0.364027	0.596142	0.0540057	-0.0218442	-0.0758499	0.117927	0.841935	0.0896875	-0.0590757	-0.148763	0.0621678	0.474341
CLCN7	0.0680551	0.212595	0.144539	0.364027	0.596142	0.0525708	0.174522	0.121952	0.73947	0.97592	-0.0922609	0.0886392	0.1809	0.109319	0.512285
PRPF4	-0.00731851	-0.00458752	0.00273099	0.364027	0.596142	0.0473693	-0.00968672	-0.057056	0.186379	0.846944	-0.018487	-0.0591698	-0.0406827	0.703774	0.899201
GMFG	0.0540519	-0.145494	-0.199546	0.364027	0.596142	0.0298359	0.00747548	-0.0223605	0.769219	0.976213	0.197512	0.0263497	-0.171162	0.132801	0.55872
LOC648705	0.0812823	0.0346325	-0.0466497	0.364027	0.596142	0.00413777	0.0804551	0.0763173	0.160975	0.842492	0.0265462	0.0241782	-0.00236802	0.949501	0.984405
RPL7A	-0.0713281	-0.224442	-0.153114	0.364027	0.596142	0.0735048	-0.0369049	-0.11041	0.262117	0.864679	0.15116	-0.0219692	-0.173129	0.0421693	0.43989
LOC127295	-0.113967	-0.196777	-0.0828095	0.364027	0.596142	-0.0190787	-0.110168	-0.0910891	0.377121	0.880912	-0.096436	-0.17712	-0.0806842	0.680367	0.896366
FAM53C	-0.179388	0.148136	0.327524	0.364027	0.596142	-0.180488	-0.0482608	0.132227	0.22967	0.846944	-0.157143	0.060847	0.21799	0.0955325	0.505194
ZMAT2	-0.0690066	0.0252455	0.0942521	0.364027	0.596142	0.0343593	0.0792108	0.0448515	0.799303	0.976213	0.177225	0.080449	-0.0967765	0.949501	0.984405
RPS9	-0.316135	0.0355496	0.351685	0.364027	0.596142	-0.117631	0.135406	0.253038	0.356113	0.880912	0.141631	0.121986	-0.0196448	0.465384	0.787534
CLIC1	-0.149612	-0.221084	-0.0714716	0.364027	0.596142	-0.0210232	-0.0836116	-0.0625884	0.597071	0.93843	-0.0371921	-0.0423336	-0.00514143	0.657257	0.88978
NCF4	-0.102558	0.0572094	0.159768	0.364027	0.596142	-0.213352	-0.15968	0.0536719	0.799303	0.976213	-0.151706	-0.10727	0.0444358	0.751397	0.91331
CD8A	-0.228342	-0.248605	-0.0202637	0.364027	0.596142	0.127588	0.0524252	-0.0751631	0.335838	0.874328	0.0760928	-0.0498275	-0.12592	0.0831389	0.485136
DEM1	-0.109594	-0.023506	0.0860882	0.364027	0.596142	-0.0132923	-0.0476963	-0.034404	0.799303	0.976213	-0.0802299	-0.125705	-0.0454751	0.589885	0.862183
PHIP	0.0764232	-0.0409624	-0.117386	0.364027	0.596142	-0.0387991	-0.119862	-0.0810626	0.17334	0.846944	0.0571799	-0.027416	-0.0845959	0.703774	0.899201
OCIAD1	-0.0959308	-0.0583471	0.0375838	0.364027	0.596142	0.0582649	-0.0316588	-0.0899236	0.160975	0.842492	-0.0284094	0.0307597	0.0591691	0.974738	0.995658
OSBPL5	-0.00543534	0.0814579	0.0868932	0.364027	0.596142	0.0803754	0.0985062	0.0181308	0.570107	0.931623	-0.0635855	0.0163005	0.079886	0.293709	0.683974
LRG1	0.055652	0.146638	0.0909861	0.364027	0.596142	-0.140646	-0.204483	-0.0638366	0.624584	0.950221	-0.173571	0.0332706	0.206841	0.340207	0.722359
NDUFB10	0.00599034	0.102378	0.0963872	0.364027	0.596142	-0.00761073	0.00805084	0.0156616	0.652614	0.950221	-0.053095	0.0442274	0.0973224	0.391043	0.746314
ARAP3	-0.0798914	0.0421393	0.122031	0.364027	0.596142	-0.203321	-0.0337261	0.169595	0.710093	0.971673	-0.149535	0.10438	0.253915	0.049419	0.450689
IMPA2	-0.0410163	0.0207962	0.0618125	0.364027	0.596142	-0.065393	0.108855	0.174248	0.377121	0.880912	-0.179028	-0.117349	0.0616793	0.356674	0.722359
ACTN1	0.041677	-0.0133175	-0.0549945	0.364027	0.596142	-0.27564	0.0278776	0.303518	0.043844	0.814322	-0.189286	0.0377792	0.227065	0.0302791	0.411742
SLC16A3	0.211202	0.0206524	-0.190549	0.364027	0.596142	0.0173523	-0.195045	-0.212397	0.127763	0.841935	-0.0383871	-0.0988939	-0.0605068	0.611998	0.865435
LOC285900	-0.0277442	-0.123147	-0.0954031	0.381857	0.612176	0.00851725	0.1003	0.0917831	0.769219	0.976213	0.130957	-0.0651085	-0.196066	0.0774362	0.485136
LOC644039	0.0666305	-0.328379	-0.39501	0.381857	0.612176	0.104143	-0.20265	-0.306793	0.160975	0.842492	0.0911533	-0.0979935	-0.189147	0.116762	0.523025
SQSTM1	0.193123	0.217467	0.0243443	0.381857	0.612176	0.108642	0.0388068	-0.0698348	0.953226	0.997776	0.0873469	0.043124	-0.0442229	0.5258	0.830699
NUP214	-0.146265	-0.0344484	0.111816	0.381857	0.612176	-0.242224	-0.169157	0.0730673	0.769219	0.976213	-0.145069	-0.0919122	0.0531567	0.568138	0.848307
RPS14	-0.296043	-0.0619448	0.234098	0.381857	0.612176	0.0369234	0.127046	0.0901231	0.421297	0.90244	0.098238	0.00532356	-0.0929145	0.465384	0.787534
LOC648852	-0.205243	0.0283204	0.233563	0.381857	0.612176	-0.061142	-0.136977	-0.0758348	0.73947	0.97592	-0.0831307	-0.1317	-0.0485692	0.79996	0.93074
C5AR1	-0.0941219	0.0391675	0.133289	0.381857	0.612176	-0.0823419	-0.142175	-0.0598335	1	1	-0.228238	-0.241481	-0.0132433	0.874183	0.96198
LOC441775	-0.281426	-0.179549	0.101877	0.381857	0.612176	0.0546769	0.0368653	-0.0178117	0.922122	0.992503	-0.0406196	-0.12359	-0.0829702	0.546771	0.838603
SLC12A9	-0.139856	0.0395666	0.179422	0.381857	0.612176	-0.112767	-0.157725	-0.0449576	0.984401	1	-0.200297	0.0465567	0.246854	0.116762	0.523025
LOC642333	-0.0711207	-0.140151	-0.0690306	0.381857	0.612176	0.0403229	-0.0323355	-0.0726584	0.570107	0.931623	0.0103847	-0.0274418	-0.0378265	0.703774	0.899201
CD93	0.205317	-0.153547	-0.358864	0.381857	0.612176	0.0475195	-0.0106235	-0.058143	0.984401	1	0.0187885	0.0772197	0.0584313	0.82454	0.942774
NUCB1	0.429828	0.357819	-0.0720095	0.381857	0.612176	0.131652	0.0489876	-0.082664	0.127763	0.841935	-0.00821526	-0.0296455	-0.0214302	0.703774	0.899201
SLC25A39	-0.0216965	0.0360404	0.0577369	0.381857	0.612176	-0.0650746	0.0478827	0.112957	0.398851	0.886789	-0.0128817	0.130391	0.143273	0.0576534	0.469552
EMR3	-0.0843079	0.0215634	0.105871	0.381857	0.612176	-0.230575	-0.182161	0.0484133	0.799303	0.976213	-0.104453	-0.0295867	0.0748658	0.180088	0.589837
LHFP	0.00297242	-0.0554047	-0.0583771	0.381857	0.612176	-0.0580472	-0.011218	0.0468291	0.829677	0.981817	-0.0322389	-0.00903859	0.0232003	0.79996	0.93074
IL32	-0.143723	-0.0490354	0.0946873	0.381857	0.612176	0.0491331	-0.0572157	-0.106349	0.829677	0.981817	-0.046283	-0.0731761	-0.0268931	0.611998	0.865435
FNBP1	0.160566	0.00191233	-0.158654	0.381857	0.612176	0.0033002	0.184099	0.180798	0.398851	0.886789	0.0392777	0.0978448	0.0585671	0.408937	0.756757
LGALS3	-0.0235757	0.0399199	0.0634956	0.381857	0.612176	-0.0619246	0.0176643	0.0795889	0.421297	0.90244	0.0131288	0.113451	0.100322	0.589885	0.862183
FAM104A	-0.0236347	0.0476427	0.0712774	0.381857	0.612176	-0.0529848	0.0728539	0.125839	0.468278	0.920241	0.0135526	0.217987	0.204434	0.0329517	0.428935
LIME1	-0.263197	-0.155985	0.107212	0.381857	0.612176	-0.0712724	-0.00318675	0.0680857	0.597071	0.93843	-0.0673783	-0.196696	-0.129318	0.703774	0.899201
LOC642113	-0.237992	-0.147918	0.0900736	0.400198	0.626415	-0.134112	-0.250418	-0.116306	0.73947	0.97592	0.124653	-0.0222031	-0.146856	0.202063	0.604601
PTBP1	0.0826141	-0.0207297	-0.103344	0.400198	0.626415	0.0768534	0.159882	0.0830283	0.710093	0.971673	0.0673091	0.0651638	-0.0021453	0.505237	0.815988
SFXN4	0.0576223	0.00992805	-0.0476942	0.400198	0.626415	-0.0119901	-0.0254445	-0.0134544	0.624584	0.950221	-0.01247	-0.101745	-0.0892749	0.0955325	0.505194
FAU	-0.374389	-0.0207802	0.353608	0.400198	0.626415	-0.00954749	0.0920999	0.101647	0.468278	0.920241	0.217119	0.0175104	-0.199609	0.213737	0.618861
LOC651894	-0.136521	-0.0425638	0.0939568	0.400198	0.626415	0.0937378	0.0601843	-0.0335534	0.953226	0.997776	0.166269	0.0437402	-0.122528	0.340207	0.722359
IFI6	0.525323	0.468903	-0.0564203	0.400198	0.626415	0.350519	-0.0354773	-0.385996	0.00693677	0.586928	-0.000964015	-0.184843	-0.183879	0.340207	0.722359
CTDSP2	-0.0262961	0.0554067	0.0817029	0.400198	0.626415	0.0169066	-0.0775903	-0.094497	0.953226	0.997776	0.0242397	0.0404264	0.0161867	0.37362	0.733278
MAPRE2	-0.0354832	-0.112583	-0.0770995	0.400198	0.626415	0.052861	-0.0798128	-0.132674	0.117927	0.841935	0.101863	-0.0683454	-0.170209	0.169772	0.581041
PYGL	-0.0861204	0.0373322	0.123453	0.400198	0.626415	-0.17466	-0.13924	0.0354202	0.922122	0.992503	-0.140432	-0.0272598	0.113172	0.308723	0.699681
CAPN1	0.0441582	0.0480896	0.00393139	0.400198	0.626415	-0.0497111	0.150025	0.199736	0.0643409	0.841935	-0.0889382	0.0410942	0.130032	0.109319	0.512285
NQO2	-0.050812	0.0225128	0.0733248	0.400198	0.626415	-0.0551459	-0.0945931	-0.0394472	0.799303	0.976213	-0.0962715	-0.0657934	0.0304781	0.949501	0.984405
HLA-DRB3	0.213405	0.262248	0.048843	0.400198	0.626415	0.0912268	-0.00483936	-0.0960661	0.468278	0.920241	-0.0870438	-0.0520072	0.0350365	0.849289	0.952479
GK2	-0.0195253	-0.027272	-0.00774678	0.400198	0.626415	-0.103997	-0.0800726	0.0239243	0.377121	0.880912	-0.0773923	-0.0209247	0.0564676	0.751397	0.91331
LY96	0.0421163	-0.0263472	-0.0684635	0.400198	0.626415	0.0613285	0.074006	0.0126775	0.860302	0.985143	0.0998263	0.0983417	-0.00148463	0.293709	0.683974
FOXJ2	-0.0129247	-0.0330286	-0.0201039	0.400198	0.626415	-0.0279334	0.175088	0.203021	0.138203	0.841935	-0.153777	-0.052922	0.100855	0.0621678	0.474341
LOC645609	-0.0134896	-0.00824599	0.00524359	0.400198	0.626415	-0.0786487	-0.0587945	0.0198542	0.922122	0.992503	-0.0838311	-0.00375565	0.0800755	0.0774362	0.485136
XPO6	0.0304414	0.148503	0.118062	0.400198	0.626415	-0.258425	-0.109752	0.148672	0.316299	0.874271	-0.22857	-0.139511	0.0890594	0.213737	0.618861
IL1B	0.38815	0.127035	-0.261115	0.400198	0.626415	-0.0219456	-0.136323	-0.114378	0.710093	0.971673	-0.17643	-0.0805949	0.0958355	0.265134	0.667436
MGC13057	-0.0333859	0.0451745	0.0785604	0.400198	0.626415	0.0102299	0.111279	0.101049	0.710093	0.971673	0.156673	0.211394	0.0547208	0.899199	0.967831
MMP9	-0.253887	-0.0941373	0.15975	0.400198	0.626415	-0.397845	-0.133887	0.263957	0.421297	0.90244	-0.486856	-0.238203	0.248653	0.703774	0.899201
PRDX6	0.182731	-0.0347981	-0.21753	0.400198	0.626415	0.0935328	0.0319377	-0.0615951	0.799303	0.976213	0.106289	0.216892	0.110604	0.150446	0.571395
RPL7	-0.0327732	-0.0852246	-0.0524514	0.400198	0.626415	0.0271168	0.02622	-0.000896834	0.68113	0.958743	0.191476	0.0722991	-0.119177	0.0621678	0.474341
RPL36AL	-0.0141795	-0.138954	-0.124775	0.400198	0.626415	0.143899	0.121762	-0.0221372	0.769219	0.976213	0.0599049	-0.0332242	-0.0931291	0.634461	0.876846
LOC653658	0.0810355	-0.12176	-0.202796	0.419045	0.643352	0.159883	0.0528874	-0.106996	0.710093	0.971673	0.301777	0.130298	-0.17148	0.25157	0.658318
XPNPEP3	-0.0411782	0.0184849	0.059663	0.419045	0.643352	0.0312838	-0.0759693	-0.107253	0.356113	0.880912	-0.135191	-0.0506767	0.0845138	0.949501	0.984405
LOC388474	0	-0.0631837	-0.0631837	0.419045	0.643352	0.0387893	0	-0.0387893	0.564869	0.931623	0.111772	0	-0.111772	0.234834	0.647439
LMAN1	0.0201695	-0.00515169	-0.0253212	0.419045	0.643352	-0.0026142	-0.011805	-0.0091908	0.297499	0.864679	0.0174255	0.0525655	0.03514	0.324223	0.714605
UQCRHL	-0.0720197	-0.165612	-0.093592	0.419045	0.643352	0.0642914	0.0661377	0.00184632	0.953226	0.997776	0.110182	0.0205995	-0.0895825	0.124586	0.542127
GRK5	0.0241377	-0.00888874	-0.0330264	0.419045	0.643352	-0.00535172	-0.0409831	-0.0356314	0.444443	0.91595	0.0327416	0.00133097	-0.0314106	0.949501	0.984405
PRSS33	0.113019	0.0380993	-0.0749198	0.419045	0.643352	0.0999066	0.0142574	-0.0856492	0.769219	0.976213	0.0301673	-0.0434316	-0.0735989	0.546771	0.838603
GNS	0.386279	0.183738	-0.202541	0.419045	0.643352	-0.0398515	-0.0332962	0.00655525	0.860302	0.985143	-0.0590933	0.00794334	0.0670366	0.505237	0.815988
PHF23	0.0147124	0.0446183	0.0299059	0.419045	0.643352	0.0286648	-0.0554417	-0.0841065	0.043844	0.814322	0.0255794	-0.0300041	-0.0555835	0.974738	0.995658
CD6	-0.186157	-0.121238	0.0649188	0.419045	0.643352	0.0806296	0.057733	-0.0228966	0.468278	0.920241	-0.102207	-0.0129418	0.0892649	0.849289	0.952479
PROK2	-0.222394	-0.424732	-0.202339	0.419045	0.643352	-0.318904	-0.325994	-0.0070897	0.652614	0.950221	0.0560516	-0.141828	-0.19788	0.727457	0.902948
LOC401206	-0.0804862	-0.163533	-0.0830463	0.419045	0.643352	0.108281	0.162272	0.0539913	0.984401	1	0.174971	0.166047	-0.00892447	0.391043	0.746314
TUBA1B	0.117147	-0.00588271	-0.12303	0.419045	0.643352	0.204659	0	-0.204659	0.160975	0.842492	0.0798829	-0.134593	-0.214476	0.0147214	0.39589
NDRG1	0.010842	-0.041998	-0.05284	0.419045	0.643352	0.0548286	0.0720493	0.0172207	0.953226	0.997776	-0.043668	-0.0375523	0.00611573	0.849289	0.952479
RPL22	-0.078575	-0.202336	-0.123761	0.419045	0.643352	0.0204951	-0.105772	-0.126267	0.297499	0.864679	0.0953668	0.106476	0.0111089	0.874183	0.96198
RNASE3	0.0096302	-0.084582	-0.0942122	0.419045	0.643352	-0.102474	-0.0280621	0.0744121	0.316299	0.874271	-0.13318	-0.195235	-0.0620555	0.727457	0.902948
ZNF69	-0.133339	-0.0697922	0.0635469	0.419045	0.643352	0.0121591	-0.143005	-0.155164	0.543719	0.931623	-0.259821	-0.370981	-0.11116	0.485095	0.803917
CD52	-0.655551	-0.150805	0.504746	0.419045	0.643352	0.110184	0.318241	0.208056	0.799303	0.976213	0.440939	0.323809	-0.117131	0.427297	0.763818
PAM	-0.0130569	-0.125787	-0.11273	0.419045	0.643352	0.057844	0.0925447	0.0347007	0.799303	0.976213	0.120552	0.157424	0.0368718	0.391043	0.746314
RIC8B	0.0236061	-0.0234642	-0.0470703	0.438389	0.657153	0.051528	0.044876	-0.00665199	0.769219	0.976213	0.0513735	0.024518	-0.0268555	0.849289	0.952479
GSTM1	-0.104824	0.00179098	0.106615	0.438389	0.657153	-0.013708	0.0540374	0.0677454	0.0260523	0.734772	-0.0369012	-0.0617969	-0.0248957	0.775571	0.918503
EIF1B	-0.0630869	0.00546974	0.0685566	0.438389	0.657153	0.0732821	-0.0043282	-0.0776103	0.279439	0.864679	-0.0575376	0.0274315	0.084969	0.775571	0.918503
RNF19B	0.130959	0.058394	-0.0725653	0.438389	0.657153	-0.00591842	-0.134124	-0.128206	0.117927	0.841935	-0.109892	-0.194002	-0.0841097	0.225876	0.627753
LOC646195	-0.0628824	-0.115568	-0.0526853	0.433303	0.657153	-0.0181107	0.0637027	0.0818134	0.245529	0.851802	-0.0482904	-0.0285379	0.0197525	0.712106	0.902948
IL2RB	-0.020446	-0.0925587	-0.0721128	0.438389	0.657153	0.304279	0.310638	0.00635933	0.984401	1	0.0839916	0.0479249	-0.0360667	1	1
LOC341457	-0.0222763	-0.0413783	-0.019102	0.438389	0.657153	0.18484	0.034867	-0.149973	1	1	0.151638	-0.0320828	-0.183721	0.180088	0.589837
ZC3H3	0.0326759	0.0911673	0.0584913	0.438389	0.657153	-0.0976984	-0.00481676	0.0928816	0.468278	0.920241	-0.144068	-0.123113	0.0209555	0.150446	0.571395
SGK	-0.172122	-0.214297	-0.0421756	0.438389	0.657153	-0.0552545	0.0770942	0.132349	0.444443	0.91595	0.119518	0.0710004	-0.0485177	0.924313	0.978949
TUBB1	0.0668125	-0.0984584	-0.165271	0.438389	0.657153	0.112315	0.0499778	-0.0623374	0.860302	0.985143	0.329141	0.352055	0.0229144	0.340207	0.722359
TIMP1	0.0564729	0.0811552	0.0246823	0.438389	0.657153	0.0319895	-0.0914639	-0.123453	0.799303	0.976213	-0.191091	-0.0901714	0.100919	0.589885	0.862183
LOC389599	0.106112	0.192146	0.0860339	0.438389	0.657153	-0.145277	-0.0676342	0.0776424	0.398851	0.886789	0.191906	0.129526	-0.0623794	0.202063	0.604601
EVL	-0.106734	0.0174885	0.124222	0.438389	0.657153	0.146105	0.213646	0.0675411	0.117927	0.841935	0.221466	0.249164	0.0276974	0.82454	0.942774
BECN1	0.0434217	0.0372868	-0.00613487	0.438389	0.657153	0.011804	-0.110499	-0.122303	0.117927	0.841935	0.00122488	-0.0194054	-0.0206303	0.37362	0.733278
RPL31	-0.0720313	-0.240103	-0.168072	0.438389	0.657153	0.267175	0.0408892	-0.226286	0.316299	0.874271	0.526341	0.227587	-0.298754	0.0891672	0.497442
PFDN5	-0.239589	-0.0222595	0.21733	0.438389	0.657153	0.0961137	-0.0171633	-0.113277	0.68113	0.958743	0.273884	0.203643	-0.0702409	0.446115	0.772962
LOC646766	-0.487278	-0.116963	0.370315	0.438389	0.657153	-0.00342937	-0.0191431	-0.0157137	0.953226	0.997776	0.203477	0.122652	-0.0808253	0.202063	0.604601
FAIM3	-0.259642	-0.0932372	0.166404	0.438389	0.657153	0.172536	0.0814666	-0.0910695	0.984401	1	0.111864	-0.0191385	-0.131003	0.293709	0.683974
LYN	0.260683	0.037263	-0.22342	0.438389	0.657153	-0.0632114	-0.158849	-0.0956374	0.543719	0.931623	-0.137892	-0.0376698	0.100222	0.37362	0.733278
SARS	-0.0316737	0.00424784	0.0359215	0.438389	0.657153	-0.0191251	-0.0183812	0.0007439	0.517936	0.931623	-0.0577932	-0.086633	-0.0288398	0.427297	0.763818
LPCAT2	0.23099	0.10355	-0.12744	0.438389	0.657153	0.0880105	-0.0534076	-0.141418	0.279439	0.864679	0.0409092	0.00777333	-0.0331359	0.949501	0.984405
MYL6	-0.409743	0.131938	0.541681	0.438389	0.657153	-0.0597789	0.199755	0.259534	0.444443	0.91595	0.0345138	0.171916	0.137402	0.849289	0.952479
COMMD7	0.0365784	-0.0114707	-0.0480491	0.438389	0.657153	0.0220056	0.0920252	0.0700196	0.377121	0.880912	0.111825	0.0896984	-0.0221264	0.657257	0.88978
SLC15A3	0.20104	0.317777	0.116737	0.438389	0.657153	0.00950571	-0.00196394	-0.0114697	0.769219	0.976213	-0.208047	0.0131688	0.221216	0.213737	0.618861
RPS24	-0.0501963	-0.0856382	-0.0354419	0.458224	0.672975	0.123914	0.10657	-0.0173443	0.891131	0.988487	0.198182	0.182221	-0.0159613	0.634461	0.876846
HIST2H2AA3	0.162479	0.177978	0.0154998	0.458224	0.672975	-0.160002	-0.136465	0.0235368	0.829677	0.981817	-0.175007	-0.130955	0.0440511	0.5258	0.830699
GNPNAT1	-0.00688198	-0.0183425	-0.0114605	0.458224	0.672975	0.0127188	0.00702172	-0.00569703	0.860302	0.985143	0.0201836	-0.0559926	-0.0761762	0.37362	0.733278
TRMT112	-0.0145216	-0.117159	-0.102637	0.458224	0.672975	0.0678926	-0.00296524	-0.0708579	0.398851	0.886789	0.0586529	-0.0820361	-0.140689	0.225876	0.627753
PRICKLE4	-0.143576	0.0746956	0.218271	0.458224	0.672975	0.0724538	0.0719886	-0.000465202	0.891131	0.988487	0.0767644	0.0138591	-0.0629053	0.150446	0.571395
RPL13	-0.0398368	-0.0308224	0.00901439	0.458224	0.672975	-0.021964	-0.0155028	0.00646118	0.597071	0.93843	0.0435602	0.0361829	-0.00737728	0.485095	0.803917
GZMH	-0.203485	-0.0973733	0.106112	0.458224	0.672975	0.139951	0.132941	-0.00700989	0.710093	0.971673	-0.131001	0.0716833	0.202684	1	1
NCSTN	0.286373	0.0775739	-0.208799	0.458224	0.672975	0.138765	0.0194848	-0.11928	0.444443	0.91595	0.0295434	0.140114	0.110571	0.265134	0.667436
SLC45A4	-0.0264463	0.0459666	0.0724129	0.458224	0.672975	-0.177804	-0.0899699	0.0878345	0.624584	0.950221	-0.20603	-0.0487585	0.157272	0.0534075	0.459546
NADK	0.0282081	0.0896513	0.0614432	0.458224	0.672975	-0.130673	-0.165097	-0.0344232	0.570107	0.931623	-0.23418	-0.0921505	0.14203	0.132801	0.55872
SGSM2	-0.153857	-0.0908112	0.0630458	0.458224	0.672975	-0.00916154	0.111962	0.121123	0.570107	0.931623	-0.185601	-0.0870012	0.0986002	0.356674	0.722359
C19ORF43	-0.0975457	-0.200117	-0.102571	0.458224	0.672975	-0.0084463	-0.0728531	-0.0644068	0.356113	0.880912	-0.0284731	-0.153161	-0.124688	0.225876	0.627753
RPS15A	-0.346471	0.0436696	0.390141	0.458224	0.672975	0.0753706	0.108432	0.0330615	0.829677	0.981817	0.288414	0.203026	-0.0853876	0.238485	0.647439
ATP5O	-0.0583436	-0.00913871	0.0492049	0.458224	0.672975	0.1258	0.160412	0.0346123	0.984401	1	0.262369	0.0399271	-0.222441	0.0669622	0.474341
CTSW	0.0420566	0.0259714	-0.0160853	0.458224	0.672975	0.0456897	0.100281	0.0545911	0.517936	0.931623	-0.0104278	-0.076749	-0.0663212	0.680367	0.896366
FFAR2	0.41178	0.146888	-0.264891	0.458224	0.672975	-0.141344	-0.191943	-0.0505996	0.597071	0.93843	-0.257871	-0.254145	0.00372651	0.82454	0.942774
TRIM25	0.0492714	0.198336	0.149065	0.458224	0.672975	-0.233063	-0.148163	0.0849	0.652614	0.950221	-0.0729184	-0.0504729	0.0224455	0.213737	0.618861
HS.377419	0.00278139	0.0459488	0.0431674	0.458224	0.672975	0.0108929	0.00874276	-0.00215013	0.799303	0.976213	-0.00429348	0.0196583	0.0239517	0.82454	0.942774
ZC3H4	0.0213796	-0.0539436	-0.0753232	0.458224	0.672975	-0.0145965	-0.118116	-0.10352	0.421297	0.90244	-0.0338096	0.049381	0.0831907	0.37362	0.733278
MEPCE	-0.0338847	-0.0671366	-0.0332519	0.458224	0.672975	0.111249	-0.0647834	-0.176033	0.624584	0.950221	-0.0656691	-0.101766	-0.0360973	0.611998	0.865435
CYTH1	-0.0605873	-0.0177165	0.0428707	0.458224	0.672975	-0.0393508	-0.0301258	0.00922496	0.262117	0.864679	-0.112197	0.0210811	0.133278	0.37362	0.733278
TMEM120A	-0.0830848	-0.0630574	0.0200274	0.478538	0.68886	-0.0941788	-0.0856227	0.00855603	0.829677	0.981817	-0.0912187	-0.0818558	0.00936295	0.703774	0.899201
CRIP1	-0.265261	-0.156144	0.109117	0.478538	0.68886	-0.00295844	-0.171646	-0.168688	0.597071	0.93843	-0.0761775	-0.207338	-0.13116	0.340207	0.722359
BANK1	-0.0137419	-0.0761338	-0.062392	0.478538	0.68886	0.0768524	0.0163484	-0.0605041	1	1	0.248629	0.270956	0.0223273	0.703774	0.899201
LOC390354	-0.198368	-0.0314703	0.166897	0.478538	0.68886	-0.0561654	-0.0369779	0.0191876	0.891131	0.988487	0.05365	-0.124182	-0.177832	0.5258	0.830699
ZNF419	-0.0361126	-0.0457297	-0.00961709	0.478538	0.68886	0.0208856	0.0387278	0.0178422	0.922122	0.992503	0.000102521	0.0252226	0.0251201	0.611998	0.865435
ACSL1	0.0475549	-0.0245423	-0.0720972	0.478538	0.68886	0.0540037	-0.294559	-0.348562	0.17334	0.846944	-0.10666	0.207308	0.313968	0.505237	0.815988
RPS20	-0.265769	-0.464777	-0.199008	0.478538	0.68886	0.184008	0.0341885	-0.14982	0.297499	0.864679	0.183624	-0.0952498	-0.278873	0.116762	0.523025
NFIL3	0.0719392	-0.00844887	-0.0803881	0.478538	0.68886	-0.0563373	-0.0589719	-0.00263462	0.710093	0.971673	0.0558634	0.0242194	-0.0316441	0.899199	0.967831
DAZAP2	0.109044	0.0320343	-0.07701	0.478538	0.68886	-0.000101934	0.0606447	0.0607467	0.984401	1	0.0326069	0.150962	0.118355	0.37362	0.733278
USP10	-0.113066	-0.0175879	0.0954784	0.478538	0.68886	-0.0370445	-0.143079	-0.106034	0.953226	0.997776	-0.0345483	-0.0288004	0.00574793	1	1
RPS25	-0.129313	-0.341678	-0.212365	0.473549	0.68886	0.114864	0.163654	0.0487902	0.891131	0.988487	0.173755	0.0462258	-0.127529	0.202063	0.604601
CCDC130	-0.0962909	-0.0514849	0.044806	0.478538	0.68886	0.100047	-0.0229637	-0.123011	0.517936	0.931623	-0.0140791	-0.0437313	-0.0296522	0.727457	0.902948
SLC4A1	0.13008	0.19447	0.0643904	0.478538	0.68886	-0.0294565	0.213914	0.243371	0.356113	0.880912	-0.175171	0.226055	0.401226	0.0421693	0.43989
COTL1	0.0671614	0.143391	0.0762293	0.478538	0.68886	0.0478274	-0.0355398	-0.0833673	0.0643409	0.841935	-0.0234851	-0.0493804	-0.0258952	0.446115	0.772962
TMCO1	-0.0614699	-0.0916025	-0.0301326	0.478538	0.68886	0.0935898	0.0227174	-0.0708724	0.570107	0.931623	0.340991	0.241486	-0.0995046	0.132801	0.55872
PADI4	-0.264399	-0.089399	0.175	0.478538	0.68886	-0.334654	0.0340489	0.368703	0.398851	0.886789	-0.217281	-0.129632	0.087649	0.465384	0.787534
C19ORF22	0	0.131656	0.131656	0.478538	0.68886	0.151854	-0.142723	-0.294578	0.652614	0.950221	-0.176252	-0.0692307	0.107021	0.27918	0.670647
DMC1	-0.0727227	0.0016287	0.0743514	0.478538	0.68886	0.0495182	-0.0709352	-0.120453	0.335838	0.874328	-0.0447904	-0.144722	-0.0999314	0.727457	0.902948
S1PR5	-0.157752	-0.0807007	0.0770515	0.478538	0.68886	0.10503	-0.0990825	-0.204112	1	1	-0.162754	0.0153279	0.178082	0.485095	0.803917
NCF1B	0.0575546	0.0971413	0.0395867	0.478538	0.68886	-0.0731893	-0.14397	-0.070781	0.570107	0.931623	-0.116962	-0.0791644	0.0377972	0.546771	0.838603
COX6B1	-0.0279944	0.0175023	0.0454968	0.478538	0.68886	-0.0413853	-0.0628762	-0.0214909	0.652614	0.950221	-0.100152	-0.120793	-0.0206413	0.408937	0.756757
GLIPR2	0.157385	0.108248	-0.049137	0.499321	0.702185	-0.0941919	-0.124371	-0.0301787	0.444443	0.91595	-0.0484695	-0.0625253	-0.0140557	0.82454	0.942774
ABHD5	0.0773602	-0.00203356	-0.0793938	0.499321	0.702185	-0.139234	-0.220254	-0.0810202	0.297499	0.864679	-0.207402	-0.033473	0.173929	0.568138	0.848307
STAT3	0.0531743	0.175669	0.122495	0.499321	0.702185	-0.0853417	-0.0649281	0.0204136	0.245529	0.851802	-0.196098	-0.121012	0.0750859	0.265134	0.667436
TRIM56	0.145458	0.192557	0.0470989	0.499321	0.702185	0.0469883	-0.0459425	-0.0929308	0.73947	0.97592	-0.118496	0.00987281	0.128369	0.37362	0.733278
CDC37	0.0460018	0.130702	0.0847005	0.499321	0.702185	0.0275809	0.101903	0.0743217	0.262117	0.864679	0.105108	0.0624604	-0.0426473	0.324223	0.714605
LOC158345	-0.067792	-0.116359	-0.0485666	0.499321	0.702185	0.127763	0.0383035	-0.0894596	0.799303	0.976213	0.235951	0.0231831	-0.212768	0.356674	0.722359
UCP2	0.0188196	0.0688586	0.050039	0.499321	0.702185	0.0520046	0.0694737	0.0174691	0.922122	0.992503	-0.115606	-0.236701	-0.121095	0.727457	0.902948
LOC650276	-0.0991375	-0.138648	-0.0395102	0.499321	0.702185	0.276571	0.140673	-0.135898	0.769219	0.976213	0.862249	0.686703	-0.175546	0.465384	0.787534
LOC646630	-0.0103451	-0.0596384	-0.0492933	0.499321	0.702185	0.0206191	-0.189009	-0.209628	0.200105	0.846944	0.275892	-0.0732966	-0.349189	0.0213265	0.39589
HNRPC	-0.0304349	-0.0570112	-0.0265763	0.499321	0.702185	-0.0726922	-0.0956164	-0.0229242	0.984401	1	0.00919274	-0.0297076	-0.0389003	0.308723	0.699681
FTHL8	0.0356884	0.0280904	-0.00759806	0.499321	0.702185	0.0436849	-0.103607	-0.147292	0.468278	0.920241	-0.0458642	-0.00433476	0.0415294	0.568138	0.848307
ADAM8	-0.160757	-0.0674822	0.0932746	0.499321	0.702185	-0.217626	-0.112874	0.104752	0.829677	0.981817	-0.219019	-0.137289	0.0817308	0.5258	0.830699
DDOST	0.0295632	-0.0284348	-0.0579979	0.499321	0.702185	-0.00903903	-0.0248449	-0.0158059	0.262117	0.864679	0.07017	-0.0477907	-0.117961	0.102246	0.512239
RPS11	-0.147826	-0.151812	-0.00398627	0.499321	0.702185	0.11545	0.120244	0.0047937	0.398851	0.886789	-0.0129064	0.0849653	0.0978717	0.79996	0.93074
MIF4GD	0.00169789	0.0705904	0.0688925	0.499321	0.702185	-0.0251539	-0.00398588	0.021168	0.517936	0.931623	-0.0689801	-0.00436367	0.0646164	0.427297	0.763818
S100A12	0.0835672	-0.165152	-0.248719	0.499321	0.702185	-0.084462	-0.196131	-0.111669	0.398851	0.886789	-0.151007	-0.0630251	0.0879817	0.703774	0.899201
HLA-F	0.0675736	0.0529873	-0.0145863	0.499321	0.702185	0.0355153	-0.0945811	-0.130096	0.17334	0.846944	-0.0739147	-0.108542	-0.0346275	0.727457	0.902948
TIMM10	0.33448	0.163002	-0.171478	0.499321	0.702185	0.176195	-0.00426769	-0.180463	0.117927	0.841935	0.0873426	-0.0281074	-0.11545	0.27918	0.670647
PPBP	0.0566642	0.016233	-0.0404312	0.499321	0.702185	-0.0863668	0.0649419	0.151309	0.570107	0.931623	0.0944364	0.194827	0.100391	0.589885	0.862183
LOC647022	-0.0170141	-0.0324173	-0.0154032	0.499321	0.702185	-0.0120374	-0.0538062	-0.0417688	0.297499	0.864679	-0.00483736	-0.0356774	-0.0308401	0.408937	0.756757
POLE3	0.0410509	-0.00553541	-0.0465863	0.499321	0.702185	0.0909449	0.132744	0.0417993	0.922122	0.992503	0.074925	0.0578496	-0.0170753	0.899199	0.967831
CFLAR	0.00836727	0.0794394	0.0710721	0.499321	0.702185	-0.242415	-0.276959	-0.0345433	0.799303	0.976213	-0.236832	-0.13633	0.100502	0.446115	0.772962
MCM6	-0.00166286	-0.0468782	-0.0452154	0.499321	0.702185	0.113629	0.0260951	-0.0875337	0.543719	0.931623	0.061237	0.0270702	-0.0341668	0.293709	0.683974
SIN3A	-0.119789	-0.0210738	0.0987147	0.499321	0.702185	-0.078079	0.0608946	0.138974	0.0208721	0.706403	0.0367304	0.103126	0.0663957	0.0831389	0.485136
VAMP8	-0.148277	-0.0100258	0.138251	0.499321	0.702185	0.180237	0.152787	-0.0274496	1	1	0.0520383	0.0363169	-0.0157214	0.949501	0.984405
LOC642989	-0.0125816	-0.124729	-0.112147	0.520562	0.715538	-0.0372293	-0.00290533	0.0343239	0.517936	0.931623	0.0779118	-0.0209351	-0.0988469	0.225876	0.627753
RPS6	-0.19112	-0.385769	-0.194649	0.520562	0.715538	-0.00538187	0.0012359	0.00661777	0.860302	0.985143	0.119316	-0.187274	-0.306589	0.0831389	0.485136
C1ORF71	-0.130524	-0.0894203	0.0411034	0.520562	0.715538	0.00655027	0.0925967	0.0860465	0.356113	0.880912	-0.00432117	0.120392	0.124714	0.293709	0.683974
LOC651751	-0.0788691	-0.0593631	0.019506	0.520562	0.715538	-0.0401169	-0.109443	-0.0693264	0.891131	0.988487	0.0633096	-0.026763	-0.0900726	0.727457	0.902948
LOC731096	-0.134219	-0.429576	-0.295356	0.520562	0.715538	0.138461	-0.0236228	-0.162084	0.73947	0.97592	0.105613	-0.189089	-0.294703	0.427297	0.763818
ECGF1	0.42918	0.412772	-0.0164084	0.520562	0.715538	-0.0796045	0.016866	0.0964705	0.570107	0.931623	-0.054262	-0.145047	-0.0907847	0.874183	0.96198
AVPR2	-0.00805053	-0.014946	-0.00689545	0.520562	0.715538	0.0479236	-0.0209021	-0.0688258	0.0186261	0.69189	0.0142352	0.0506742	0.036439	0.657257	0.88978
LOC642210	-0.0175077	-0.0967133	-0.0792056	0.520562	0.715538	0.136304	0.078554	-0.0577504	0.710093	0.971673	0.136487	-0.0634711	-0.199958	0.216665	0.62615
SPRR1A	-0.0327508	0.0128535	0.0456043	0.520562	0.715538	-0.00703655	0.0337756	0.0408121	0.0771358	0.841935	0.0155178	0.0312148	0.015697	0.680367	0.896366
NAPSB	0.0791328	0.0451869	-0.0339458	0.520562	0.715538	0.00621863	-0.00809819	-0.0143168	0.543719	0.931623	0.0492803	0.00756811	-0.0417122	0.899199	0.967831
GRN	0.145915	0.228512	0.0825972	0.520562	0.715538	-0.049705	-0.0923965	-0.0426915	0.891131	0.988487	-0.153794	-0.0667697	0.0870247	0.293709	0.683974
RNPEP	0.0841214	0.119935	0.0358136	0.520562	0.715538	0.0755197	0.0519621	-0.0235576	1	1	-0.0941575	0.0944274	0.188585	0.190849	0.599306
LOC643284	-0.255949	-0.0584368	0.197512	0.520562	0.715538	0.0531391	-0.0164634	-0.0696025	0.570107	0.931623	0.0844575	0.254623	0.170166	0.611998	0.865435
HEXDC	-0.00718674	0.0372381	0.0444248	0.520562	0.715538	8.98812e-05	0.0815051	0.0814152	0.356113	0.880912	-0.0160216	0.0146802	0.0307018	0.505237	0.815988
WBP2	0.0628551	-0.032585	-0.0954401	0.520562	0.715538	0.0971859	-0.167416	-0.264602	0.149269	0.842492	-0.109029	-0.2042	-0.0951713	0.775571	0.918503
TPT1	-0.203821	-0.126617	0.0772041	0.520562	0.715538	0.148963	0.0287247	-0.120238	0.444443	0.91595	0.474967	0.207572	-0.267395	0.0254742	0.39589
RHOB	0.0755341	0.0268251	-0.048709	0.520562	0.715538	-0.0874255	-0.109249	-0.021823	0.570107	0.931623	-0.0765166	-0.085178	-0.00866142	0.546771	0.838603
LOC649923	-0.0816453	-0.0679927	0.0136526	0.520562	0.715538	-0.00732938	-0.0581942	-0.0508649	0.356113	0.880912	0.0102091	-0.0630001	-0.0732092	0.589885	0.862183
LOC731985	-0.175398	-0.0486004	0.126798	0.520562	0.715538	0.0160455	0.0878592	0.0718137	0.468278	0.920241	-0.0835142	0.0250388	0.108553	0.391043	0.746314
FKSG30	0.0260291	-0.0586325	-0.0846617	0.520562	0.715538	0.0494096	0.035335	-0.0140746	0.953226	0.997776	-0.0165412	-0.0163908	0.000150419	0.775571	0.918503
HS.475334	-0.0207512	-0.0932144	-0.0724632	0.520562	0.715538	-0.0337448	0.0261271	0.0598719	0.245529	0.851802	-0.0517059	-0.004564	0.0471419	0.202063	0.604601
HS.545976	-0.00881317	0.0243873	0.0332005	0.520562	0.715538	-0.0224964	0.00690548	0.0294019	0.316299	0.874271	-0.0253269	0.0148707	0.0401976	0.132801	0.55872
HS.539367	0.00501816	0.0455327	0.0405145	0.520562	0.715538	0.0324326	0.0352672	0.0028346	0.860302	0.985143	0.011349	0.00960324	-0.00174576	0.265134	0.667436
SGSH	-0.0203995	-0.0144349	0.00596458	0.520562	0.715538	0.0684612	0.116082	0.0476204	0.597071	0.93843	-0.0206444	-0.0619008	-0.0412564	0.974738	0.995658
RPL24	0.00486154	-0.201894	-0.206756	0.520562	0.715538	0.273171	0.0447429	-0.228429	0.570107	0.931623	0.188425	-0.045673	-0.234098	0.124586	0.542127
ELF4	0.100562	0.154223	0.0536609	0.542246	0.73148	-0.0749968	-0.0102999	0.0646969	0.624584	0.950221	-0.10225	-0.0194356	0.0828146	0.225876	0.627753
SRRD	-0.004992	0.0565612	0.0615532	0.542246	0.73148	0.0554258	0.0306594	-0.0247664	0.829677	0.981817	-0.0883875	0.0715421	0.15993	0.0254742	0.39589
LOC645138	-0.275719	0.0686093	0.344328	0.542246	0.73148	-0.0316231	-0.0185772	0.0130459	0.922122	0.992503	0.104722	-0.0891103	-0.193832	0.141418	0.569788
RXRA	0.0299563	0.125006	0.0950493	0.542246	0.73148	-0.0644188	0.0285492	0.092968	0.262117	0.864679	-0.190234	-0.0851744	0.105059	0.27918	0.670647
PANX2	-0.143614	-0.00862144	0.134993	0.542246	0.73148	-0.21479	-0.170791	0.0439987	0.597071	0.93843	-0.237302	-0.049839	0.187463	0.408937	0.756757
PHF21A	0.211759	0.0995497	-0.112209	0.542246	0.73148	-0.12499	0.00467877	0.129669	0.543719	0.931623	-0.188777	0.0260837	0.21486	0.150446	0.571395
GAST	0.132685	0.0958702	-0.0368147	0.542246	0.73148	0.0343311	-0.0308472	-0.0651784	0.138203	0.841935	-0.00234421	-0.000468408	0.0018758	0.546771	0.838603
SNX27	0.107043	0.101898	-0.00514482	0.542246	0.73148	-0.0440713	0.00818017	0.0522515	0.829677	0.981817	-0.108589	0.0520568	0.160645	0.0720478	0.485136
TNFAIP2	0.213916	0.243221	0.0293048	0.542246	0.73148	-0.0564485	-0.101956	-0.0455078	0.860302	0.985143	-0.14278	-0.183376	-0.0405965	0.924313	0.978949
MMD	-0.0536756	-0.0867488	-0.0330732	0.542246	0.73148	0.0249589	-0.0901195	-0.115078	0.73947	0.97592	0.395534	0.34439	-0.0511447	0.751397	0.91331
LOC642489	-0.00621628	0.14393	0.150146	0.542246	0.73148	-0.0723087	-0.065101	0.00720778	0.922122	0.992503	-0.168444	-0.215383	-0.0469388	0.703774	0.899201
HIST1H1C	0.035857	0.060446	0.0245891	0.542246	0.73148	-0.351664	-0.14925	0.202414	0.517936	0.931623	-0.0594946	-0.00971293	0.0497816	0.427297	0.763818
LOC728888	-0.270657	-0.170454	0.100203	0.542246	0.73148	-0.00330238	0.0193768	0.0226792	0.73947	0.97592	-0.073581	-0.119358	-0.0457771	0.634461	0.876846
NFKBIA	0.155172	0.136867	-0.0183047	0.542246	0.73148	-0.0985547	0.0256257	0.12418	0.245529	0.851802	-0.109839	-0.0263432	0.0834954	0.408937	0.756757
LOC653505	0.0124475	0.0341496	0.0217021	0.542246	0.73148	0.0735071	0.113898	0.0403906	0.710093	0.971673	0.111105	-0.145727	-0.256832	0.0329517	0.428935
C15ORF39	0.264487	0.220649	-0.0438385	0.542246	0.73148	-0.121821	-0.0610883	0.0607323	0.829677	0.981817	-0.184453	-0.108491	0.0759625	0.874183	0.96198
SS18L2	-0.0907099	-0.0903733	0.000336595	0.542246	0.73148	0.149535	0.162478	0.0129432	0.860302	0.985143	0.249119	0.152162	-0.0969573	0.180088	0.589837
LOC441743	-0.0256558	0.082636	0.108292	0.542246	0.73148	0.127275	0.00851148	-0.118763	0.200105	0.846944	0.0651849	0.0746479	0.00946296	0.427297	0.763818
LRAP	-0.130631	-0.161807	-0.0311762	0.542246	0.73148	-0.0432225	-0.130628	-0.0874052	0.891131	0.988487	-0.205713	-0.263669	-0.0579561	1	1
MOBK1B	0.0291046	-0.038727	-0.0678317	0.542246	0.73148	0.0338237	0.0204505	-0.0133732	0.543719	0.931623	0.0986833	0.0742781	-0.0244052	0.751397	0.91331
LSM1	-0.0482142	0.0687081	0.116922	0.542246	0.73148	0.199613	0.24973	0.050117	0.652614	0.950221	0.272801	0.172404	-0.100398	0.27918	0.670647
ITGB2	0.182114	0.0121905	-0.169923	0.56436	0.741605	0.0555485	0.0434415	-0.012107	0.73947	0.97592	-0.0455052	0.083062	0.128567	0.391043	0.746314
LOC388532	-0.185604	-0.0406004	0.145004	0.56436	0.741605	0.056221	0.114034	0.0578127	0.597071	0.93843	0.317183	0.249576	-0.067607	0.703774	0.899201
MSRB2	0.121765	0.299539	0.177774	0.56436	0.741605	-0.163943	-0.0547468	0.109197	0.769219	0.976213	-0.113197	0.0141956	0.127393	0.427297	0.763818
CCND2	-0.114982	-0.021093	0.0938892	0.56436	0.741605	-0.027092	0.122463	0.149555	0.0233421	0.725511	-0.057472	0.0922221	0.149694	0.0891672	0.497442
KCNH6	-0.0698941	-0.0654974	0.00439663	0.56436	0.741605	0.0123697	-0.077603	-0.0899727	0.117927	0.841935	-0.061264	-0.0474616	0.0138024	0.899199	0.967831
PFDN2	0.0213942	0.0351305	0.0137363	0.56436	0.741605	0.0620325	-0.0304565	-0.092489	0.0842449	0.841935	-0.0197106	-0.0182192	0.00149142	0.391043	0.746314
CD27	-0.236011	-0.0966902	0.139321	0.56436	0.741605	-0.0717086	-0.0651849	0.00652369	0.68113	0.958743	0.0823292	-0.190785	-0.273114	0.0254742	0.39589
PI3	0.332644	0.393847	0.0612027	0.56436	0.741605	-0.152195	-0.143575	0.00862034	0.769219	0.976213	-0.243242	-0.103718	0.139525	0.0774362	0.485136
FES	0	0.124489	0.124489	0.56436	0.741605	-0.0106887	-0.112487	-0.101798	0.799303	0.976213	-0.133141	-0.164935	-0.0317942	0.751397	0.91331
SPI1	0.131478	0.0959481	-0.0355299	0.56436	0.741605	-0.0665486	-0.110035	-0.0434865	0.398851	0.886789	-0.196981	-0.256214	-0.0592337	0.680367	0.896366
C9ORF78	-0.0200694	-0.0658925	-0.0458231	0.56436	0.741605	0.0723806	0.114262	0.0418813	0.953226	0.997776	0.187016	0.341365	0.154349	0.634461	0.876846
GPR56	-0.0497111	-0.161206	-0.111495	0.56436	0.741605	0.0822668	-0.0143284	-0.0965952	0.492781	0.927696	-0.0493675	-0.125142	-0.0757749	0.546771	0.838603
PLSCR3	0.012556	-0.0459743	-0.0585303	0.56436	0.741605	0.142711	0.156733	0.0140219	0.984401	1	0.109298	0.00762406	-0.101674	0.82454	0.942774
LOC391656	-0.311087	-0.0162837	0.294804	0.56436	0.741605	0.0643742	-0.0518413	-0.116215	0.799303	0.976213	0.400919	0.179096	-0.221822	0.141418	0.569788
EIF2AK2	0.288584	0.282889	-0.00569532	0.56436	0.741605	-0.085128	-0.0940822	-0.00895411	0.922122	0.992503	-0.151887	-0.178191	-0.0263045	0.79996	0.93074
TPP1	0.204375	0.0284971	-0.175878	0.56436	0.741605	0.0938266	-0.0517091	-0.145536	0.953226	0.997776	0.0229207	-0.0112135	-0.0341342	0.505237	0.815988
RPL23	-0.0526876	-0.170643	-0.117955	0.56436	0.741605	0.0503138	0.140563	0.0902491	0.570107	0.931623	0.0611903	0.097318	0.0361277	0.657257	0.88978
ZBP1	0.41539	0.312188	-0.103202	0.56436	0.741605	0.0530682	-0.0763317	-0.1294	0.0483847	0.818777	-0.0681498	-0.230194	-0.162044	0.190849	0.599306
SUPT4H1	0.0215229	0.0143766	-0.00714633	0.56436	0.741605	-0.145035	-0.119997	0.0250377	0.73947	0.97592	0.000656834	-0.146691	-0.147348	0.0358174	0.43989
LOC643319	-0.0186263	-0.0750127	-0.0563864	0.56436	0.741605	0.00407534	-0.0972181	-0.101293	0.335838	0.874328	-0.166427	-0.133194	0.0332323	0.568138	0.848307
LOC649821	-0.0287836	-0.147297	-0.118513	0.56436	0.741605	-0.144662	0.0820462	0.226709	0.279439	0.864679	0.0127397	-0.0204184	-0.0331581	0.727457	0.902948
LOC441246	-0.278608	-0.0390365	0.239572	0.56436	0.741605	0.15168	0.116591	-0.0350885	0.68113	0.958743	0.349833	0.113588	-0.236245	0.446115	0.772962
TM7SF3	-0.0364498	-0.0339451	0.00250475	0.56436	0.741605	-0.139695	-0.0445087	0.095186	0.316299	0.874271	-0.121717	-0.0304138	0.0913037	0.611998	0.865435
CEACAM8	0.00345986	-0.0585433	-0.0620032	0.56436	0.741605	-0.0991271	-0.0809999	0.0181272	0.356113	0.880912	-0.0236037	-0.107242	-0.0836381	0.949501	0.984405
ITPR3	-0.143878	-0.114322	0.0295567	0.56436	0.741605	-0.00990789	0.0846904	0.0945983	0.200105	0.846944	-0.0216852	-0.0447916	-0.0231063	0.924313	0.978949
PLCG2	0.0691542	-0.0492752	-0.118429	0.56436	0.741605	-0.113833	0.0553269	0.16916	0.356113	0.880912	-0.100648	-0.0314794	0.0691685	0.427297	0.763818
M6PR	-0.0366206	0.00958409	0.0462047	0.56436	0.741605	-0.0415522	0.00715061	0.0487028	0.769219	0.976213	-0.0346406	-0.119475	-0.0848344	0.27918	0.670647
FPR1	0.053978	0.115662	0.0616836	0.56436	0.741605	-0.279733	-0.246984	0.032749	0.860302	0.985143	-0.205232	-0.111854	0.093378	0.391043	0.746314
HLA-A29.1	0.133561	-0.00766534	-0.141226	0.56436	0.741605	0.0905064	-0.0104093	-0.100916	0.624584	0.950221	-0.00476196	-0.0654236	-0.0606616	1	1
RPS26P11	-0.0504826	-0.0169374	0.0335452	0.56436	0.741605	0.000874331	0.0321927	0.0313184	0.652614	0.950221	0.0158271	-0.136656	-0.152483	0.159895	0.571642
PSCD4	0.00500194	0.107197	0.102195	0.586887	0.75684	-0.108526	-0.0808496	0.0276764	0.891131	0.988487	-0.162735	-0.170279	-0.00754401	0.775571	0.918503
LASP1	0.174444	0.17946	0.00501683	0.586887	0.75684	-0.0713296	-0.0771406	-0.00581107	0.984401	1	-0.131424	-0.0652734	0.0661505	0.213737	0.618861
COQ10A	-0.0345578	-0.0696293	-0.0350714	0.586887	0.75684	0.00190814	0.00580789	0.00389975	0.922122	0.992503	-0.0599418	-0.0339428	0.025999	0.949501	0.984405
RPS29	-0.34462	-0.0596225	0.284998	0.586887	0.75684	0.0633051	0.143271	0.0799655	0.468278	0.920241	0.0708621	0.029389	-0.0414731	0.657257	0.88978
PACSIN2	-0.029755	0.0508104	0.0805655	0.586887	0.75684	-0.17173	0.0527177	0.224447	0.543719	0.931623	-0.121304	0.0818379	0.203142	0.0891672	0.497442
LRRC41	0.0801398	0.0466648	-0.033475	0.586887	0.75684	0.000109783	0.00744183	0.00733204	1	1	-0.0406421	0.0542951	0.0949372	0.27918	0.670647
NAGK	0.281923	0.0584368	-0.223486	0.586887	0.75684	-0.0970915	-0.00188071	0.0952108	0.860302	0.985143	-0.0950227	-0.179349	-0.0843262	0.356674	0.722359
LOC645385	-0.0104839	-0.0737767	-0.0632928	0.586887	0.75684	0.12892	0.132041	0.00312115	0.710093	0.971673	0.082259	0.096939	0.01468	0.751397	0.91331
IRX1	0.110804	0.0766154	-0.0341885	0.586887	0.75684	0.0568775	0.0797574	0.0228799	0.799303	0.976213	-0.0831811	0.0656435	0.148825	0.25157	0.658318
PRF1	-0.00114102	-0.0909666	-0.0898256	0.586887	0.75684	0.0656218	0.0575773	-0.00804445	0.891131	0.988487	-0.0236347	-0.0446505	-0.0210158	0.924313	0.978949
TUBA1A	0.0799202	0.01714	-0.0627802	0.586887	0.75684	-0.104129	-0.104081	4.83107e-05	0.829677	0.981817	-0.129606	-0.102491	0.0271154	0.82454	0.942774
PRR14	0.0882361	0.0928923	0.00465618	0.586887	0.75684	-0.132277	0.00855254	0.140829	0.421297	0.90244	-0.131794	-0.0436126	0.0881818	0.132801	0.55872
RPL4	-0.193217	-0.194364	-0.00114659	0.586887	0.75684	-0.0628733	0.0262285	0.0891018	0.68113	0.958743	0.299464	-0.0671211	-0.366585	0.0147214	0.39589
C20ORF11	-0.0914713	-0.0619587	0.0295126	0.586887	0.75684	-0.0282109	0.077871	0.106082	0.356113	0.880912	-0.14922	0.0616983	0.210919	0.0358174	0.43989
C16ORF57	-0.0105733	0.0677592	0.0783325	0.586887	0.75684	-0.154855	-0.102768	0.0520873	0.860302	0.985143	-0.0642264	-0.134317	-0.0700907	0.849289	0.952479
GIMAP5	-0.0978988	-0.169524	-0.0716253	0.586887	0.75684	0.157229	0.118025	-0.0392039	0.492781	0.927696	0.0766091	-0.0465567	-0.123166	0.0831389	0.485136
KIAA1324	0.0216556	0.0431699	0.0215143	0.586887	0.75684	-0.11408	-0.00693513	0.107145	0.652614	0.950221	-0.141852	0.0151557	0.157008	0.141418	0.569788
CHP	0.0854705	-0.0215996	-0.10707	0.586887	0.75684	0.0413171	-0.127951	-0.169268	0.492781	0.927696	-0.0443984	0.0135532	0.0579517	0.634461	0.876846
PSMC5	0.00383204	0.0452053	0.0413733	0.586887	0.75684	-0.0228282	0.0738148	0.096643	0.335838	0.874328	0.0375056	-0.0161483	-0.0536539	0.849289	0.952479
HSPA1A	0.140954	0.0930502	-0.0479043	0.586887	0.75684	-0.350223	-0.022417	0.327805	0.356113	0.880912	-0.106887	-0.0590207	0.047866	0.265134	0.667436
ZNF766	-0.0232111	-0.0345068	-0.0112957	0.586887	0.75684	-0.00808538	-0.0308599	-0.0227745	0.297499	0.864679	0.0437482	-0.0188153	-0.0625634	0.589885	0.862183
RPL37A	-0.0748303	-0.0173053	0.057525	0.586887	0.75684	0.0288344	0.016275	-0.0125594	0.377121	0.880912	0.0381003	-0.0391926	-0.0772929	0.465384	0.787534
BASP1	-0.157658	-0.094281	0.0633768	0.609811	0.775891	-0.15861	-0.404241	-0.245631	0.652614	0.950221	-0.120663	-0.0911837	0.0294793	0.751397	0.91331
RPL17	-0.263354	-0.208205	0.0551489	0.609811	0.775891	0.293008	0.147106	-0.145902	0.624584	0.950221	0.448718	0.321266	-0.127452	0.190849	0.599306
LOC402057	-0.102964	-0.127505	-0.0245407	0.609811	0.775891	0.125038	0.0145247	-0.110514	0.543719	0.931623	0.253387	0.228868	-0.0245188	0.213737	0.618861
ACTA2	0.130167	0.242449	0.112282	0.609811	0.775891	0.0897072	-0.011445	-0.101152	0.444443	0.91595	-0.0591444	-0.0266546	0.0324898	0.5258	0.830699
LOC652694	-0.1589	-0.156472	0.00242824	0.609811	0.775891	-0.140041	-0.134586	0.00545562	0.652614	0.950221	-0.0795564	0.0433477	0.122904	0.634461	0.876846
TMEM154	0.0866598	-0.0508186	-0.137478	0.609811	0.775891	0.00621311	-0.0983647	-0.104578	0.492781	0.927696	-0.129236	-0.0140999	0.115136	0.308723	0.699681
TMED1	0.0119046	0.0244909	0.0125863	0.609811	0.775891	0.0102127	-0.0403143	-0.050527	0.356113	0.880912	-0.0150643	0.0198344	0.0348987	0.899199	0.967831
YWHAH	0.0945869	-0.0153286	-0.109916	0.609811	0.775891	-0.0426923	0.0486189	0.0913112	0.398851	0.886789	0.0732284	0.120831	0.0476028	0.408937	0.756757
IFI35	0.709831	0.686322	-0.0235087	0.609811	0.775891	0.0765537	-0.0260537	-0.102607	0.316299	0.874271	-0.209955	-0.0375189	0.172436	0.79996	0.93074
LOC654194	-0.288188	-0.136909	0.151279	0.609811	0.775891	0.328198	0.258664	-0.0695339	1	1	0.365294	0.441905	0.0766116	0.751397	0.91331
SLC30A7	0.0497118	0.0026366	-0.0470752	0.609811	0.775891	0.0287682	-0.0584008	-0.087169	0.597071	0.93843	-0.0368933	0.00725918	0.0441524	0.874183	0.96198
MIF	-0.118397	-0.0945147	0.0238825	0.609811	0.775891	-0.0871635	0.0140626	0.101226	0.570107	0.931623	-0.0919669	-0.167461	-0.0754941	0.485095	0.803917
LOC729021	-0.199686	0.0434357	0.243122	0.609811	0.775891	-0.235233	-0.262839	-0.027606	0.444443	0.91595	-0.228392	-0.283765	-0.0553733	1	1
VAMP5	0.454158	0.56016	0.106002	0.609811	0.775891	0.18174	-0.0194487	-0.201189	0.117927	0.841935	-0.152947	-0.069287	0.0836603	0.775571	0.918503
CD99	-0.110451	-0.0607382	0.0497128	0.609811	0.775891	0.0446719	-0.0712664	-0.115938	0.769219	0.976213	0.0107551	-0.010136	-0.0208911	0.611998	0.865435
SNX22	-0.00324333	-0.00577664	-0.00253331	0.609811	0.775891	-0.0649143	-0.0397031	0.0252112	0.829677	0.981817	-0.0651074	-0.0494835	0.015624	0.611998	0.865435
LOC648622	-0.343493	0.0759523	0.419445	0.633113	0.788415	0.147005	0.278419	0.131414	0.543719	0.931623	0.525159	0.306327	-0.218832	0.27918	0.670647
LOC731640	-0.0528733	0.00496665	0.05784	0.633113	0.788415	0.199469	0.244567	0.0450975	0.68113	0.958743	0.278825	0.294865	0.0160398	0.924313	0.978949
EDG4	-0.136914	-0.0191168	0.117797	0.633113	0.788415	-0.147089	-0.112	0.0350886	0.492781	0.927696	-0.198057	-0.158935	0.0391224	0.293709	0.683974
DAPP1	0.0744214	0.0420324	-0.032389	0.633113	0.788415	-0.0224782	0.0136195	0.0360976	0.799303	0.976213	0.0547975	0.0568618	0.00206431	0.82454	0.942774
FBXO7	0.0679936	0.039337	-0.0286566	0.633113	0.788415	-0.0744403	-0.0849611	-0.0105207	0.597071	0.93843	0.0190913	0.10528	0.0861885	0.169772	0.581041
SEMA4D	0.0279033	0.0356396	0.00773628	0.633113	0.788415	-0.00502018	0.111814	0.116834	0.377121	0.880912	-0.119497	-0.12707	-0.00757282	0.27918	0.670647
RPLP1	-0.153132	-0.0732619	0.0798697	0.633113	0.788415	0.0783804	0.0943169	0.0159365	0.860302	0.985143	0.136255	-0.0337694	-0.170024	0.202063	0.604601
ZBED1	0.156663	0.141173	-0.0154897	0.633113	0.788415	-0.0356421	0.0548653	0.0905073	0.860302	0.985143	-0.0788402	-0.0176987	0.0611415	0.25157	0.658318
C17ORF45	-0.209026	-0.0616097	0.147416	0.633113	0.788415	-0.000606242	0.031378	0.0319843	0.624584	0.950221	0.368761	0.148563	-0.220197	0.324223	0.714605
MYH9	-0.101983	-0.0588576	0.0431258	0.633113	0.788415	-0.156219	0.177512	0.333731	0.160975	0.842492	-0.133024	0.0201071	0.153132	0.308723	0.699681
BST2	0.366608	0.400925	0.0343168	0.633113	0.788415	0.0292816	0.050207	0.0209253	0.68113	0.958743	-0.129032	0.0387641	0.167796	0.225876	0.627753
NOTCH1	-0.0294624	0.166337	0.1958	0.633113	0.788415	-0.127295	0.0341509	0.161446	0.127763	0.841935	0.116342	0.223455	0.107113	0.150446	0.571395
FOLR3	-0.0630294	0.0278125	0.0908419	0.633113	0.788415	-0.13275	-0.290015	-0.157265	0.597071	0.93843	-0.135948	-0.0669975	0.068951	0.727457	0.902948
SRRM2	-0.118132	-0.0117496	0.106383	0.633113	0.788415	-0.00818324	-0.00445678	0.00372646	0.829677	0.981817	-0.13321	-0.222886	-0.0896767	0.974738	0.995658
C3ORF19	-0.0874571	-0.095159	-0.00770189	0.633113	0.788415	0.0113246	0.00677989	-0.0045447	0.799303	0.976213	-0.0863994	-0.0323683	0.054031	0.265134	0.667436
RPS26	-0.0825677	-0.0294242	0.0531435	0.633113	0.788415	0.0227685	0.0316757	0.00890723	0.953226	0.997776	0.0735744	-0.11381	-0.187385	0.150446	0.571395
ANKRD40	-0.00584419	-0.0107587	-0.00491454	0.633113	0.788415	-0.0349769	-0.0148806	0.0200962	0.922122	0.992503	0.0326377	-0.0495035	-0.0821412	0.293709	0.683974
LOC653506	-0.0340015	0.00663232	0.0406338	0.633113	0.788415	-0.004867	-0.0350126	-0.0301456	0.984401	1	-0.0762239	0.0212405	0.0974644	0.132801	0.55872
TXNDC12	-0.52969	-0.309425	0.220264	0.633113	0.788415	0.0232055	-0.00122338	-0.0244289	0.860302	0.985143	0.0915154	0.0590982	-0.0324171	0.505237	0.815988
PGD	-0.0123881	0.0617421	0.0741302	0.633113	0.788415	-0.233678	-0.160434	0.073244	0.769219	0.976213	-0.217151	-0.172648	0.0445022	1	1
KLRB1	-0.479949	-0.111839	0.368109	0.633113	0.788415	0.0941085	0.183928	0.0898192	0.922122	0.992503	0.144068	0.0977091	-0.0463588	0.589885	0.862183
FTHL3	-0.0138908	-0.0382169	-0.0243261	0.633113	0.788415	-0.0559204	-0.0704456	-0.0145252	0.984401	1	0.0311201	-0.0751067	-0.106227	0.446115	0.772962
HADHB	0.0963026	0.065222	-0.0310805	0.633113	0.788415	0.0646054	-0.0312399	-0.0958454	0.186379	0.846944	0.0244945	0.0262076	0.00171304	0.949501	0.984405
SLC19A2	0.0232497	0.0184	-0.00484966	0.633113	0.788415	0.00707627	-0.0436372	-0.0507135	0.492781	0.927696	0.00292057	-0.00862784	-0.0115484	0.82454	0.942774
LRRFIP1	-0.0679978	-0.188632	-0.120634	0.633113	0.788415	-0.00617694	-0.255358	-0.249181	0.570107	0.931623	-0.296894	-0.0867914	0.210103	0.356674	0.722359
HNRPA1L-2	-0.00283319	-0.0290662	-0.026233	0.633113	0.788415	0.00922617	0.0532918	0.0440657	0.984401	1	0.078492	-0.000864028	-0.079356	0.0621678	0.474341
PFKFB4	0.0291002	0.132699	0.103599	0.656776	0.806669	-0.178574	-0.145351	0.0332229	0.953226	0.997776	-0.17719	-0.016434	0.160756	0.159895	0.571642
LOC646531	-0.0804721	0.0783917	0.158864	0.656776	0.806669	-0.0201863	0.00771507	0.0279013	0.73947	0.97592	0.0279689	0.109527	0.0815584	0.27918	0.670647
PVRIG	-0.226847	-0.12338	0.103467	0.656776	0.806669	0.151456	-0.0327714	-0.184227	0.297499	0.864679	-0.0198259	-0.191406	-0.17158	0.37362	0.733278
LOC647450	-0.329849	-0.201207	0.128643	0.656776	0.806669	-0.146555	-0.236381	-0.0898264	0.335838	0.874328	-0.0398244	-0.0825731	-0.0427487	0.356674	0.722359
IER2	-0.0378373	0.0130999	0.0509371	0.656776	0.806669	-0.036943	-0.0705185	-0.0335755	0.421297	0.90244	-0.13665	0.0451341	0.181784	0.0133749	0.39589
PKN2	0.0480567	-0.0269267	-0.0749834	0.656776	0.806669	-0.0494985	-0.0475133	0.00198525	0.543719	0.931623	-0.0218344	-0.0563728	-0.0345384	0.82454	0.942774
H2AFJ	0.0391021	-0.0140106	-0.0531126	0.656776	0.806669	-0.0575508	-0.0441391	0.0134118	0.624584	0.950221	0.0218576	-0.0394567	-0.0613143	0.0109959	0.39589
RPIA	0.00138332	0.0444	0.0430167	0.656776	0.806669	-0.0197094	0.0212933	0.0410026	0.799303	0.976213	0.1402	0.197994	0.0577936	0.356674	0.722359
ERAP2	0.199118	0.138937	-0.0601801	0.656776	0.806669	-0.0281593	-0.08632	-0.0581606	0.922122	0.992503	-0.0853105	-0.00334319	0.0819673	0.611998	0.865435
LBA1	0.283234	0.395793	0.112558	0.656776	0.806669	-0.0591214	-0.0268425	0.0322789	0.891131	0.988487	-0.190503	-0.178452	0.0120512	0.727457	0.902948
C19ORF59	0.0517687	0.110915	0.0591461	0.656776	0.806669	-0.28236	-0.171225	0.111135	0.922122	0.992503	-0.0862429	-0.117787	-0.0315438	0.611998	0.865435
CDC42SE1	-0.027884	-0.0773175	-0.0494335	0.656776	0.806669	-0.14319	0.0043438	0.147534	0.444443	0.91595	-0.189853	-0.228451	-0.038598	0.849289	0.952479
D4S234E	-0.158754	-0.14551	0.0132434	0.656776	0.806669	0.0942772	0.0208455	-0.0734317	0.652614	0.950221	0.0460593	0.0281474	-0.0179118	0.874183	0.96198
DGKQ	-0.150918	-0.0592292	0.091689	0.656776	0.806669	0.0611403	-0.0273938	-0.0885342	0.984401	1	-0.19036	-0.220801	-0.0304407	0.356674	0.722359
C11ORF9	0.00339869	0.0254533	0.0220546	0.656776	0.806669	0.0063329	0.0427821	0.0364492	0.829677	0.981817	0.014795	0.00439135	-0.0104036	0.589885	0.862183
SEC16A	0.0704252	-0.00761994	-0.0780452	0.656776	0.806669	-0.0233907	0.0732949	0.0966856	0.356113	0.880912	-0.203805	-0.0597195	0.144086	0.132801	0.55872
LOC440348	-0.0741653	-0.0436865	0.0304788	0.656776	0.806669	-0.00413096	-0.0534502	-0.0493192	0.149269	0.842492	-0.0529949	-0.130316	-0.0773211	1	1
LOC401019	-0.0094282	-0.0306645	-0.0212363	0.680778	0.820923	0.016008	-0.062225	-0.078233	0.316299	0.874271	0.140046	-0.115544	-0.255591	0.102246	0.512239
LOC388654	-0.0648565	-0.161285	-0.096428	0.680778	0.820923	0.0606096	0.13698	0.0763706	0.799303	0.976213	0.320666	-0.0249816	-0.345648	0.0720478	0.485136
M6PRBP1	0.260593	0.125701	-0.134892	0.680778	0.820923	-0.133172	-0.0729974	0.0601745	0.73947	0.97592	-0.142581	-0.0534888	0.0890921	0.340207	0.722359
SPCS1	-0.076032	-0.0705287	0.00550326	0.680778	0.820923	0.07632	0.0326608	-0.0436592	0.953226	0.997776	-0.00685351	-0.101246	-0.0943925	0.308723	0.699681
FLI1	0.0117912	0.0462179	0.0344266	0.680778	0.820923	0.00164242	0.084501	0.0828586	0.421297	0.90244	0.0711559	0.0642495	-0.00690641	0.82454	0.942774
HLA-H	0.0657078	0.16264	0.0969322	0.680778	0.820923	0.0918738	-0.0491178	-0.140992	0.108678	0.841935	-0.0210458	-0.0571064	-0.0360606	0.775571	0.918503
RHOC	-0.0301565	-0.0353803	-0.00522381	0.680778	0.820923	0.263978	0.0444262	-0.219552	0.117927	0.841935	-0.097152	-0.0466702	0.0504818	0.680367	0.896366
MT1A	0.291059	0.291383	0.000323999	0.680778	0.820923	0.186411	-0.079007	-0.265418	0.0842449	0.841935	-0.0940836	-0.107512	-0.0134287	1	1
KTI12	0.0100457	-0.027305	-0.0373507	0.680778	0.820923	0.0269389	-0.0600668	-0.0870057	0.262117	0.864679	0.0491695	-0.0730381	-0.122208	0.27918	0.670647
FTHL11	0.0611215	0.160935	0.0998134	0.680778	0.820923	0.0940842	0.0371583	-0.0569259	0.953226	0.997776	-0.0823432	0.0734376	0.155781	0.109319	0.512285
LOC387867	-0.300316	-0.141853	0.158462	0.680778	0.820923	-0.0433105	0.00874877	0.0520593	0.799303	0.976213	0.177793	-0.0920354	-0.269828	0.37362	0.733278
RPL13A	-0.199892	-0.17021	0.0296817	0.680778	0.820923	0.0535104	0.0871724	0.033662	0.984401	1	0.309162	-0.123343	-0.432505	0.0161821	0.39589
HPS6	0	0.0267558	0.0267558	0.680778	0.820923	0.0580021	0.0430327	-0.0149694	0.597071	0.93843	0.0829476	-0.00452694	-0.0874746	0.611998	0.865435
TMED3	-0.0626046	0.0342838	0.0968884	0.680778	0.820923	0.0257807	0.0732872	0.0475065	0.335838	0.874328	-0.0302918	0.115603	0.145895	0.79996	0.93074
PPARBP	0.000108393	0.0169902	0.0168819	0.680778	0.820923	-0.0361776	-0.0379015	-0.00172391	0.984401	1	-0.0174102	-0.0123708	0.00503947	0.427297	0.763818
OR9A4	-0.00627509	0.0083945	0.0146696	0.680778	0.820923	-0.0142254	0.00925569	0.0234811	0.68113	0.958743	0.00453328	-0.0107837	-0.015317	0.505237	0.815988
LOC652493	-0.177112	-0.223731	-0.0466186	0.680778	0.820923	-0.165945	-0.244147	-0.0782022	0.570107	0.931623	-0.181256	-0.237481	-0.0562253	0.308723	0.699681
MGC3731	0.00127622	-0.0308439	-0.0321202	0.680778	0.820923	-0.00396708	-0.0118655	-0.00789846	0.860302	0.985143	0.0289964	-0.0466216	-0.075618	0.159895	0.571642
GLIPR1	0.0151192	-0.0449677	-0.0600869	0.680778	0.820923	0.0216297	-0.0620253	-0.0836549	0.421297	0.90244	0.105488	0.0062063	-0.0992813	0.427297	0.763818
LOC440093	-0.0121912	0.00486068	0.0170519	0.680778	0.820923	-0.0997204	-0.04644	0.0532803	0.73947	0.97592	-0.106227	-0.00302245	0.103205	0.116762	0.523025
IGF2R	0.33041	-0.0500261	-0.380436	0.680778	0.820923	-0.160928	-0.0241411	0.136787	0.444443	0.91595	0.0383562	0.174706	0.13635	0.150446	0.571395
RPL10A	-0.0733353	-0.180854	-0.107519	0.680778	0.820923	0.104711	0.165786	0.0610747	0.860302	0.985143	0.257687	0.105702	-0.151985	0.611998	0.865435
HS.546375	-0.206713	-0.158689	0.0480236	0.680778	0.820923	-0.186493	0.0374456	0.223939	0.0918579	0.841935	0.101908	0.0357453	-0.0661623	0.974738	0.995658
EHD1	0.0707611	0.091374	0.0206128	0.7051	0.831166	0.00365928	-0.091964	-0.0956233	1	1	-0.0503251	0.0387353	0.0890604	0.265134	0.667436
RPL27	-0.650241	-0.0273255	0.622915	0.7051	0.831166	0.0588885	0.17168	0.112791	0.543719	0.931623	0.388892	0.183305	-0.205587	0.213737	0.618861
LILRA3	0.0290994	0.138245	0.109146	0.7051	0.831166	-0.105562	-0.0476207	0.0579417	0.68113	0.958743	-0.0524437	0.041735	0.0941787	0.546771	0.838603
RBX1	-0.0319551	0.0343894	0.0663445	0.7051	0.831166	0.0922643	0.121184	0.02892	0.922122	0.992503	0.208144	0.104171	-0.103972	0.238485	0.647439
C1ORF24	0.0645545	0.11108	0.0465252	0.7051	0.831166	-0.307542	-0.0198444	0.287697	0.0842449	0.841935	-0.201236	-0.139676	0.0615597	0.109319	0.512285
CHST15	0.0395794	-0.0497259	-0.0893053	0.7051	0.831166	-0.0550226	-0.138933	-0.08391	0.829677	0.981817	-0.284465	-0.0353564	0.249108	0.340207	0.722359
TXN	-0.156564	-0.0897752	0.0667886	0.7051	0.831166	0.0773779	-0.0503554	-0.127733	0.984401	1	0.298567	0.0454239	-0.253143	0.427297	0.763818
LOC440737	-0.316918	-0.124311	0.192606	0.7051	0.831166	0.0175982	0.122613	0.105015	0.73947	0.97592	0.226692	-0.0827463	-0.309438	0.180088	0.589837
CRKL	0.043511	0.0238667	-0.0196443	0.7051	0.831166	0.0553359	0.117893	0.0625573	0.492781	0.927696	0.127053	0.165553	0.0385	0.169772	0.581041
RNF122	-0.000708606	0.00182019	0.00252879	0.7051	0.831166	0.0306325	-0.018996	-0.0496285	0.149269	0.842492	0.0737565	0.0160638	-0.0576926	0.391043	0.746314
TNFRSF14	0.10068	0.117626	0.0169456	0.7051	0.831166	-0.0972015	0.0648676	0.162069	0.22967	0.846944	-0.0755901	0.0481761	0.123766	0.25157	0.658318
FLJ10374	-0.00323344	0.00719805	0.0104315	0.7051	0.831166	0.0114757	-0.0247424	-0.0362181	0.597071	0.93843	-0.0236841	-0.0278849	-0.00420075	0.427297	0.763818
BBC3	0.0203668	0.0112318	-0.00913502	0.7051	0.831166	0.046271	-0.0237987	-0.0700697	0.22967	0.846944	0.0136606	-0.0263621	-0.0400226	0.190849	0.599306
LOC644931	-0.0565811	-0.0646206	-0.00803953	0.7051	0.831166	0.0274561	0.000689116	-0.026767	0.468278	0.920241	-0.0499055	-0.157222	-0.107317	0.324223	0.714605
GCN1L1	-0.0226307	0.00280488	0.0254356	0.7051	0.831166	-0.060291	0.0356827	0.0959737	0.799303	0.976213	0.0328922	0.0450795	0.0121873	0.727457	0.902948
RPL30	-0.301624	-0.0402289	0.261395	0.7051	0.831166	0.169496	0.0915653	-0.0779312	0.891131	0.988487	0.301541	0.128192	-0.173349	0.340207	0.722359
RRM1	-0.059076	-0.0974251	-0.038349	0.7051	0.831166	0.125888	0.0681438	-0.0577437	0.860302	0.985143	0.0484711	0.0609675	0.0124964	0.356674	0.722359
ITGB7	0.00406181	-0.0838979	-0.0879597	0.7051	0.831166	-0.0589534	0.124281	0.183234	0.444443	0.91595	-0.121884	-0.190945	-0.0690601	0.949501	0.984405
SERPINA10	-0.0337976	-0.0183004	0.0154973	0.7051	0.831166	0.0135569	-0.00970756	-0.0232645	0.769219	0.976213	0.0299078	0.0119048	-0.0180031	0.657257	0.88978
LOC220433	-0.0660786	-0.0403024	0.0257763	0.7051	0.831166	-0.138157	0.0439851	0.182142	0.517936	0.931623	0.0607702	0.0424097	-0.0183605	0.949501	0.984405
CMTM2	-0.371355	-0.325075	0.0462802	0.7051	0.831166	-0.0899147	-0.173381	-0.0834667	0.953226	0.997776	-0.0515178	-0.0975959	-0.046078	0.568138	0.848307
C14ORF4	0.0876108	0.0546691	-0.0329416	0.7051	0.831166	-0.126835	-0.0948207	0.0320144	0.597071	0.93843	-0.154256	0.0246007	0.178857	0.180088	0.589837
IFI30	0.29853	0.189493	-0.109036	0.7051	0.831166	0.0691373	-0.0157251	-0.0848623	0.73947	0.97592	-0.0832894	-0.0341477	0.0491417	0.589885	0.862183
RPS4X	-0.18056	-0.200824	-0.0202642	0.7051	0.831166	-0.00266276	0.0436798	0.0463425	0.652614	0.950221	-0.0684363	0.080713	0.149149	0.611998	0.865435
NOP10	-0.0527345	-0.0574976	-0.00476308	0.7051	0.831166	0.0740222	-0.121288	-0.19531	0.922122	0.992503	0.0111487	-0.121624	-0.132773	0.446115	0.772962
HS.534427	-0.15252	-0.0275618	0.124958	0.7051	0.831166	-0.11586	0.0276191	0.143479	0.297499	0.864679	0.119091	-0.0925781	-0.211669	0.0774362	0.485136
SSTR2	-0.0117699	0.0257858	0.0375558	0.7051	0.831166	-0.104896	-0.126253	-0.021357	0.922122	0.992503	-0.21595	-0.0600231	0.155927	0.27918	0.670647
CARD8	0.0278738	0.0485341	0.0206603	0.7051	0.831166	0.0576509	0.0144873	-0.0431636	0.799303	0.976213	-0.0343995	0.046494	0.0808934	0.324223	0.714605
SNHG5	-0.0643464	-0.158086	-0.0937394	0.7051	0.831166	0.079116	0.0182329	-0.0608831	0.799303	0.976213	0.0746534	-0.00351879	-0.0781722	0.225876	0.627753
RPL12	-0.0941541	-0.0471379	0.0470163	0.729718	0.848367	0.0395946	0.0790446	0.03945	0.891131	0.988487	0.0753445	0.0994648	0.0241203	0.680367	0.896366
PRPF6	0.0597424	0.0404846	-0.0192578	0.729718	0.848367	0.0801339	0.036183	-0.0439509	0.245529	0.851802	0.0236805	0.0236341	-4.6467e-05	0.79996	0.93074
ISG20	0.311002	0.280201	-0.0308004	0.729718	0.848367	-0.0296432	-0.0726059	-0.0429626	0.710093	0.971673	-0.068591	-0.0531403	0.0154507	0.924313	0.978949
LOC730316	-0.051368	0.0468095	0.0981775	0.729718	0.848367	0.0342955	0.252553	0.218257	0.186379	0.846944	0.0181226	0.117981	0.0998587	0.159895	0.571642
ARHGEF18	-0.0741323	-0.0594745	0.0146578	0.729718	0.848367	-0.0631387	0.0851319	0.148271	0.297499	0.864679	-0.087521	-0.0231388	0.0643822	0.180088	0.589837
LOC648024	-0.0427643	0.0265308	0.0692952	0.729718	0.848367	0.00226179	0.0081602	0.00589841	0.570107	0.931623	-0.0328513	-0.0357662	-0.00291488	0.408937	0.756757
FCN1	0.26802	0.267186	-0.000834098	0.729718	0.848367	-0.00818585	0.0325251	0.0407109	0.891131	0.988487	0.0119768	0.0534418	0.041465	0.408937	0.756757
LOC388621	-0.0646711	-0.0163473	0.0483238	0.729718	0.848367	0.00240778	0.116097	0.113689	0.492781	0.927696	0.109001	0.176972	0.0679709	0.79996	0.93074
PSMB10	0.407496	0.422705	0.0152091	0.729718	0.848367	0.0609267	-0.0348544	-0.0957812	0.274819	0.864679	0.0468845	-0.00436357	-0.0512481	0.874183	0.96198
SESN3	-0.0475872	-0.0337296	0.0138576	0.729718	0.848367	-0.0542568	0.0126477	0.0669045	0.492781	0.927696	0.0445245	0.280616	0.236092	0.0955325	0.505194
SEPX1	-0.00933256	-0.00540977	0.00392279	0.729718	0.848367	-0.0859427	-0.211525	-0.125582	0.297499	0.864679	-0.056008	-0.118466	-0.0624583	0.5258	0.830699
LOC402694	-0.167688	-0.207708	-0.0400195	0.729718	0.848367	-0.0994209	-0.0492324	0.0501885	0.891131	0.988487	0.304754	0.101846	-0.202908	0.340207	0.722359
APPL1	-0.0394951	-0.0149671	0.024528	0.729718	0.848367	-0.0918418	0.0464293	0.138271	0.0233421	0.725511	-0.0326156	0.0563966	0.0890123	0.0720478	0.485136
CYTSA	-0.0556962	-0.0448681	0.010828	0.729718	0.848367	0.0676931	0.0304351	-0.037258	0.652614	0.950221	-0.00741167	0.023362	0.0307737	0.225876	0.627753
CEBPD	-0.154363	-0.0975533	0.0568095	0.729718	0.848367	0.0363247	-0.100995	-0.13732	0.297499	0.864679	-0.202175	-0.176017	0.0261582	0.680367	0.896366
HS.57079	-0.0555962	0.0430484	0.0986446	0.729718	0.848367	0.0458014	0.0741431	0.0283417	0.335838	0.874328	-0.0217981	0.235802	0.2576	0.190849	0.599306
CHCHD2	-0.100253	-0.0727887	0.0274639	0.729718	0.848367	0.0298698	-0.0256952	-0.0555651	0.799303	0.976213	0.0241543	-0.0480049	-0.0721591	0.150446	0.571395
MX2	0.266298	0.214038	-0.05226	0.729718	0.848367	-0.180445	-0.213594	-0.033149	0.421297	0.90244	-0.210908	-0.109781	0.101126	0.589885	0.862183
LOC653314	-0.0989542	-0.111832	-0.0128782	0.75461	0.869343	-0.0558019	0.004235	0.0600369	0.710093	0.971673	0.0540685	-0.0563982	-0.110467	0.589885	0.862183
LOC647361	-0.506473	-0.157188	0.349285	0.75461	0.869343	0.162189	0.0517839	-0.110405	0.891131	0.988487	0.299079	0.0870581	-0.212021	0.446115	0.772962
ZBTB7A	0.0228066	0.00238489	-0.0204217	0.75461	0.869343	0.0385949	0.0197629	-0.018832	0.799303	0.976213	0.0354443	0.0511377	0.0156934	0.727457	0.902948
RPS3A	-0.278718	-0.0902488	0.188469	0.75461	0.869343	0.093153	-0.0332092	-0.126362	0.652614	0.950221	0.609803	0.414799	-0.195004	0.159895	0.571642
GPSM3	-0.012436	0.0614917	0.0739277	0.75461	0.869343	-0.00435248	-0.179164	-0.174812	0.186379	0.846944	-0.166174	-0.165762	0.000412036	0.634461	0.876846
CCR7	-0.324108	-0.109207	0.214901	0.75461	0.869343	0.111194	0.0949308	-0.0162628	0.829677	0.981817	0.10334	-0.0129926	-0.116333	0.703774	0.899201
RPL9	-0.203618	-0.11979	0.0838278	0.75461	0.869343	0.115192	0.0998047	-0.0153873	1	1	0.406447	0.26752	-0.138927	0.202063	0.604601
RPL35A	-0.262276	-0.0287521	0.233524	0.75461	0.869343	0.19383	0.185339	-0.00849052	0.984401	1	0.0950791	0.14398	0.0489005	0.427297	0.763818
FGFBP2	-0.288935	-0.176502	0.112433	0.75461	0.869343	0.193417	0.0848131	-0.108604	0.517936	0.931623	0.131784	0.0427794	-0.089005	0.293709	0.683974
P704P	0.0200716	0.0133864	-0.00668512	0.75461	0.869343	-0.0623105	0.0203844	0.0826949	0.710093	0.971673	0.00841104	-0.000244326	-0.00865537	0.899199	0.967831
HS.544637	-0.103408	-0.103015	0.000393268	0.75461	0.869343	-0.0442966	-0.184167	-0.13987	0.953226	0.997776	-0.153188	-0.22682	-0.0736316	0.874183	0.96198
ZNF131	-0.0216364	-0.0298787	-0.00824233	0.75461	0.869343	-0.0557176	-0.00288424	0.0528334	0.099995	0.841935	-0.0668666	0.00925931	0.0761259	0.202063	0.604601
MAPKAPK2	0.0030927	-0.00996936	-0.0130621	0.779754	0.884263	-0.0438473	0.013546	0.0573933	0.127763	0.841935	-0.0538071	-0.00563079	0.0481764	0.159895	0.571642
MAFA	0.23659	0.207227	-0.029363	0.779754	0.884263	0.0955885	-0.0533499	-0.148938	0.070508	0.841935	0.0695126	-0.0931519	-0.162664	0.25157	0.658318
IL7R	-0.296758	-0.464402	-0.167644	0.779754	0.884263	0.0474391	0.206363	0.158924	0.891131	0.988487	0.0314532	0.141005	0.109551	0.79996	0.93074
TLN1	0.148663	-0.00969623	-0.158359	0.779754	0.884263	-0.145731	0.0604749	0.206206	0.356113	0.880912	-0.241875	-0.0747359	0.167139	0.202063	0.604601
LOC729317	-0.0108117	0.00912044	0.0199321	0.779754	0.884263	0.0286124	0.0283785	-0.000233854	0.799303	0.976213	0.0203931	-0.00393775	-0.0243308	0.485095	0.803917
ZNF746	-0.0318446	-0.0832722	-0.0514277	0.779754	0.884263	-0.0251773	-0.0552198	-0.0300426	0.769219	0.976213	-0.141233	0.0061929	0.147426	0.568138	0.848307
SELL	0.260215	0.192906	-0.0673096	0.779754	0.884263	-0.100423	-0.274147	-0.173724	0.570107	0.931623	-0.200541	-0.199654	0.000886671	0.924313	0.978949
RPL39	-0.762376	-0.0823061	0.68007	0.779754	0.884263	0.224993	0.288313	0.0633205	0.860302	0.985143	0.443406	0.134104	-0.309302	0.27918	0.670647
GTF2H5	-0.041461	0.0345379	0.0759989	0.779754	0.884263	0.0467328	0.148373	0.101641	0.984401	1	0.0900307	-0.0171657	-0.107196	0.308723	0.699681
ANXA5	0.193363	0.173726	-0.0196373	0.779754	0.884263	0.202302	-0.0571292	-0.259431	0.492781	0.927696	0.0993148	0.133675	0.0343601	0.949501	0.984405
RABEPK	-0.0655297	-0.0339688	0.0315609	0.779754	0.884263	-0.0885022	0.0571292	0.145631	0.517936	0.931623	0.104148	-0.0481937	-0.152341	0.190849	0.599306
MBD6	0.0149848	0.0479604	0.0329756	0.779754	0.884263	-0.22555	-0.126728	0.0988218	1	1	-0.220316	-0.312981	-0.0926652	0.924313	0.978949
SRPRB	-0.0239007	-0.060475	-0.0365743	0.779754	0.884263	0.0334562	0.0224167	-0.0110395	1	1	0.0261608	0.00182071	-0.0243401	0.308723	0.699681
RPS18	-0.594653	-0.243641	0.351012	0.779754	0.884263	0.213414	0.0641075	-0.149306	0.984401	1	0.268941	-0.0327424	-0.301684	0.308723	0.699681
CSK	0.0947649	0.0655587	-0.0292062	0.779754	0.884263	0.130563	-0.0155007	-0.146064	1	1	0.0129314	-0.0816697	-0.0946011	0.751397	0.91331
PABPC4	-0.135068	-0.145864	-0.0107962	0.779754	0.884263	0.0661634	-0.0565368	-0.1227	0.570107	0.931623	0.0150749	-0.145096	-0.160171	0.446115	0.772962
TCN1	-0.0840299	0.00673562	0.0907656	0.779754	0.884263	-0.0942126	-0.189703	-0.09549	0.517936	0.931623	-0.134579	-0.117953	0.0166252	1	1
RXRB	0.0122529	0.0534833	0.0412304	0.779754	0.884263	-0.00926756	0.069839	0.0791065	0.245529	0.851802	0.0286064	0.0145442	-0.0140622	0.680367	0.896366
TSPAN14	-0.000923732	0.0210046	0.0219283	0.779754	0.884263	-0.0547844	-0.100031	-0.0452463	0.335838	0.874328	-0.0258292	-0.0338948	-0.00806557	0.5258	0.830699
APBB1IP	0.103893	0.174523	0.0706304	0.779754	0.884263	-0.121406	-0.160472	-0.0390665	0.799303	0.976213	-0.282894	-0.177689	0.105205	0.5258	0.830699
ARHGEF6	-0.00309427	0.0220348	0.0251291	0.779754	0.884263	0.0929692	0.185906	0.0929373	0.297499	0.864679	0.0861063	0.0936255	0.00751922	0.408937	0.756757
RAB8A	0.0648147	0.0728515	0.00803674	0.789711	0.893559	0.0241757	-0.023292	-0.0474677	0.570107	0.931623	-0.124803	-0.176143	-0.0513397	0.924313	0.978949
NDUFA3	0	-0.038048	-0.038048	0.789711	0.893559	0.00544013	0.00460989	-0.000830237	0.517936	0.931623	-0.0973729	-0.133548	-0.0361747	0.680367	0.896366
RN7SL1	0	0.0176281	0.0176281	0.789711	0.893559	0.0601882	-0.0186834	-0.0788715	0.922122	0.992503	-0.103554	0.0186834	0.122238	0.356674	0.722359
LOC731365	-0.234314	-0.194792	0.0395217	0.805123	0.893734	0.0739161	0.0672676	-0.00664857	0.73947	0.97592	0.119758	0.00916592	-0.110592	0.159895	0.571642
ST6GALNAC2	0.0234502	0.0380011	0.0145509	0.805123	0.893734	-0.0442032	-0.0886806	-0.0444774	0.652614	0.950221	-0.103791	-0.0421769	0.0616144	0.657257	0.88978
TXNDC17	-0.0715828	0.0142885	0.0858713	0.805123	0.893734	0.0393549	0.0848482	0.0454932	0.860302	0.985143	0.0898576	0.0831574	-0.0067002	0.485095	0.803917
LOC440776	-0.0193759	0.000576438	0.0199523	0.805123	0.893734	-0.0117234	-0.0155291	-0.00380575	0.799303	0.976213	-0.0135656	-0.0238924	-0.0103268	0.727457	0.902948
C13ORF27	-0.111728	-0.0669295	0.0447984	0.805123	0.893734	-0.0142962	0.063391	0.0776873	0.468278	0.920241	0.300734	0.143342	-0.157391	0.293709	0.683974
LOC440927	-0.03573	-0.0716072	-0.0358773	0.805123	0.893734	0.0708747	-0.0560118	-0.126886	0.570107	0.931623	0.109508	-0.0686336	-0.178142	0.546771	0.838603
CETN2	0.067625	-0.0317142	-0.0993392	0.805123	0.893734	-0.0699649	-0.00837472	0.0615902	0.829677	0.981817	0.00164895	0.0205291	0.0188801	0.465384	0.787534
NEO1	-0.0348802	-0.00825093	0.0266292	0.805123	0.893734	-0.0479132	-0.0204803	0.0274329	0.597071	0.93843	-0.0372239	-0.0093944	0.0278295	0.340207	0.722359
LOC440055	-0.080604	-0.140531	-0.0599267	0.805123	0.893734	0.073805	0.142662	0.0688573	0.860302	0.985143	0.118584	0.198261	0.0796768	0.924313	0.978949
LOC347376	0.0451556	0.139944	0.0947885	0.805123	0.893734	-0.30229	-0.0503314	0.251959	0.316299	0.874271	-0.0537429	-0.0209799	0.032763	0.751397	0.91331
CSNK1G2	0.135052	-0.0584063	-0.193458	0.805123	0.893734	-0.143989	0.0215935	0.165582	0.200105	0.846944	-0.103511	0.0998473	0.203358	0.391043	0.746314
RPL27A	-0.126392	-0.277736	-0.151344	0.805123	0.893734	0.0727671	0.09466	0.0218928	0.860302	0.985143	0.0215726	0.0462332	0.0246606	0.680367	0.896366
HLA-DRB1	0.1181	0.136551	0.0184511	0.805123	0.893734	0.0388412	-0.0334899	-0.0723311	0.517936	0.931623	0.01949	0.0268548	0.00736472	0.751397	0.91331
PRAF2	0.00796954	-0.0220402	-0.0300097	0.805123	0.893734	-0.0119375	0.053253	0.0651905	0.200105	0.846944	-0.00201035	0.0215298	0.0235401	0.680367	0.896366
HIST2H2BE	-0.0116185	0.00727476	0.0188933	0.805123	0.893734	-0.134919	-0.100806	0.0341129	0.953226	0.997776	-0.0433718	-0.0211563	0.0222155	1	1
CD74	0.344944	0.197414	-0.14753	0.805123	0.893734	0.180794	-0.0142738	-0.195068	0.356113	0.880912	0.021685	-0.0666299	-0.0883149	0.924313	0.978949
PSAP	0.235545	0.17852	-0.057025	0.805123	0.893734	0.116713	0.113963	-0.00274975	0.860302	0.985143	0.0715162	0.161964	0.0904474	0.132801	0.55872
RAB2B	-0.116398	0.00793562	0.124333	0.805123	0.893734	0.08022	0.0107353	-0.0694848	0.624584	0.950221	0.126341	0.217587	0.0912461	0.634461	0.876846
LOC388720	-0.132541	-0.145092	-0.0125514	0.805123	0.893734	0.0204149	0.12491	0.104495	0.468278	0.920241	0.04951	0.0875648	0.0380548	0.634461	0.876846
SLC2A3	-0.0581642	-0.060379	-0.00221481	0.805123	0.893734	-0.0983651	-0.186574	-0.0882093	0.652614	0.950221	-0.127226	0.0535436	0.18077	0.25157	0.658318
RPS19	-0.0628551	-0.0838406	-0.0209855	0.805123	0.893734	0.0264815	0.0512778	0.0247963	0.860302	0.985143	0.0858593	0.0401981	-0.0456613	0.82454	0.942774
DNASE2	0.0264769	0.0464809	0.020004	0.805123	0.893734	0.0861957	0.0447918	-0.0414039	0.316299	0.874271	-0.0185635	-0.019489	-0.000925548	1	1
LOC402221	0.0398311	0.0599939	0.0201628	0.805123	0.893734	-0.0218307	-0.0500009	-0.0281702	0.652614	0.950221	-0.0451904	0.0197427	0.0649332	0.505237	0.815988
FAM62B	-0.182571	-0.0996541	0.0829167	0.805123	0.893734	0.162598	0.194427	0.0318286	0.421297	0.90244	0.0437517	0.022263	-0.0214887	0.505237	0.815988
YBX1	0.0281521	0.090769	0.062617	0.805123	0.893734	0.0953501	0.0798598	-0.0154903	1	1	-0.0175568	0.108902	0.126459	0.202063	0.604601
RPL3	-0.229268	-0.130358	0.0989103	0.805123	0.893734	-0.0244825	0.0493045	0.073787	0.245529	0.851802	0.117288	0.0555386	-0.0617495	0.949501	0.984405
TIGA1	-0.133686	-0.128619	0.00506692	0.830694	0.910177	0.110166	0.0773513	-0.032815	0.984401	1	0.0939139	0.150483	0.0565693	0.775571	0.918503
SPOCK2	-0.216149	-0.320076	-0.103927	0.830694	0.910177	0.260789	0.151886	-0.108903	0.624584	0.950221	0	0.0668197	0.0668197	0.775571	0.918503
RPL11	0.0407793	-0.156637	-0.197416	0.830694	0.910177	0.171736	0.139263	-0.0324732	0.570107	0.931623	0.178431	0.353529	0.175098	0.924313	0.978949
LOC284821	-0.1199	-0.178544	-0.0586445	0.830694	0.910177	0.0410568	0.129488	0.0884313	0.73947	0.97592	0.280721	0.221054	-0.0596663	0.874183	0.96198
RPS10	-0.340818	-0.0913916	0.249427	0.830694	0.910177	-0.0217006	0.111854	0.133554	0.543719	0.931623	0.255753	0.0566052	-0.199147	0.446115	0.772962
TMBIM1	-0.0424852	-0.0735601	-0.031075	0.830694	0.910177	0.0123811	-0.0860851	-0.0984662	0.543719	0.931623	-0.0779465	0.0998486	0.177795	0.102246	0.512239
PIK3IP1	-0.287776	-0.33723	-0.0494542	0.830694	0.910177	-0.0480241	0.228676	0.2767	0.279439	0.864679	0.0490113	0.0787588	0.0297475	0.703774	0.899201
TARP	-0.0571483	-0.0396464	0.017502	0.830694	0.910177	-0.0259907	0.0349214	0.060912	0.492781	0.927696	-0.0252131	0.0380999	0.063313	0.751397	0.91331
HCLS1	0.0817548	0.0366946	-0.0450602	0.830694	0.910177	-0.112965	-0.0101814	0.102784	0.262117	0.864679	-0.143533	0.0647703	0.208304	0.5258	0.830699
RPL26	-0.117261	-0.0230401	0.0942212	0.830694	0.910177	0.300469	0.143151	-0.157318	0.68113	0.958743	0.557811	0.384393	-0.173418	0.225876	0.627753
PSMB3	0.115292	0.198446	0.0831532	0.830694	0.910177	-0.0450521	-0.0441783	0.000873764	0.68113	0.958743	-0.0786638	-0.171075	-0.0924108	0.82454	0.942774
XIST	0.00462181	0.0140274	0.00940556	0.830694	0.910177	-0.0250979	0.0114842	0.0365821	0.492781	0.927696	-0.0620142	0.00973116	0.0717454	0.202063	0.604601
LOC645688	-0.268054	-0.201993	0.0660606	0.830694	0.910177	0.020398	0.0914676	0.0710695	0.652614	0.950221	0.107775	0.0200431	-0.0877324	0.427297	0.763818
CST3	0.282709	0.191545	-0.0911645	0.830694	0.910177	0.312719	0.111805	-0.200914	0.0918579	0.841935	0.0651546	0	-0.0651546	0.949501	0.984405
IFITM1	0.32055	0.269443	-0.0511073	0.830694	0.910177	0.173129	-0.0526361	-0.225765	0.099995	0.841935	0.123524	0.0652447	-0.058279	0.505237	0.815988
IQGAP1	-0.0884534	-0.0314732	0.0569802	0.830694	0.910177	-0.0551792	0.0182928	0.073472	0.68113	0.958743	0.00798539	0.0761842	0.0681988	0.25157	0.658318
HINT1	-0.316339	-0.00246653	0.313873	0.830694	0.910177	0.212773	0.212077	-0.000696448	0.710093	0.971673	0.496452	0.398704	-0.0977483	0.180088	0.589837
NDUFB2	-0.21131	0.0181021	0.229412	0.830694	0.910177	0.118081	0.00153962	-0.116541	0.922122	0.992503	0.20322	0.0625015	-0.140719	0.0774362	0.485136
ZNF428	0.0280314	0.0364741	0.0084427	0.85644	0.925077	0.131857	0.0350801	-0.0967767	0.624584	0.950221	0.097785	0.142822	0.0450372	0.775571	0.918503
RPS27	-0.405576	-0.116454	0.289122	0.85644	0.925077	0.128067	0.281487	0.15342	0.421297	0.90244	0.296185	0.275905	-0.0202798	0.505237	0.815988
LRP10	0.11662	0.0871656	-0.0294548	0.85644	0.925077	-0.184142	-0.0684637	0.115678	0.652614	0.950221	-0.138477	-0.0691955	0.069282	0.568138	0.848307
HK3	0.0601956	-0.0587792	-0.118975	0.85644	0.925077	0.189828	-0.14622	-0.336048	0.0483847	0.818777	-0.178444	-0.15781	0.0206342	0.874183	0.96198
LOC649548	-0.156514	-0.211704	-0.0551897	0.85644	0.925077	0.0455021	-0.0925106	-0.138013	0.245529	0.851802	0.0521954	-0.0456034	-0.0977988	0.485095	0.803917
MFSD10	-0.0256671	-0.0204968	0.0051703	0.85644	0.925077	-0.0834535	0.0271238	0.110577	0.570107	0.931623	-0.166503	-0.119407	0.0470958	0.546771	0.838603
STX4	0.0324122	0.074308	0.0418959	0.85644	0.925077	-0.0124133	-0.0372528	-0.0248395	0.860302	0.985143	-0.0371738	0.0163554	0.0535292	1	1
SNRPG	-0.135131	-0.0251659	0.109965	0.85644	0.925077	0.139375	0.0871262	-0.0522489	0.829677	0.981817	0.369319	0.121492	-0.247827	0.109319	0.512285
HNRPA1P4	-0.0268417	-0.0473757	-0.020534	0.85644	0.925077	0.0347146	0.0655927	0.0308781	0.891131	0.988487	0.0189934	0.0695757	0.0505823	0.775571	0.918503
LITAF	0.0930035	0.0873951	-0.00560838	0.85644	0.925077	-0.120984	-0.241173	-0.120189	0.279439	0.864679	-0.184772	-0.133678	0.0510941	0.676559	0.896366
LDHB	-0.0395808	-0.135839	-0.0962579	0.85644	0.925077	0.0423601	0.0920301	0.04967	0.769219	0.976213	0.0142381	0.015275	0.00103686	0.634461	0.876846
RAB3GAP1	0.0852754	0.0532549	-0.0320205	0.85644	0.925077	0.00621344	0.0923909	0.0861774	0.160975	0.842492	0.0183584	0.14301	0.124652	0.169772	0.581041
ATP5EP2	0.0222578	-0.00810598	-0.0303638	0.85644	0.925077	0.167719	0.00959534	-0.158123	0.829677	0.981817	0.21712	0.0704222	-0.146698	0.324223	0.714605
GZMA	-0.0504089	-0.0839246	-0.0335157	0.85644	0.925077	0.22154	0.137723	-0.0838172	0.860302	0.985143	0.32741	0.157644	-0.169766	0.190849	0.599306
PIAS1	0.0965838	-0.0224757	-0.11906	0.85644	0.925077	-0.195686	-0.0894942	0.106192	0.377121	0.880912	-0.137756	-0.13726	0.000495187	0.546771	0.838603
CSDA	0.0508047	-0.0179399	-0.0687446	0.85644	0.925077	-0.0388602	0.148756	0.187616	0.377121	0.880912	-0.0151026	0.38429	0.399392	0.0421693	0.43989
RPS4Y1	-0.0813888	-0.212548	-0.131159	0.85644	0.925077	0.00368804	0.0148259	0.0111379	0.68113	0.958743	0.0910352	-0.00573964	-0.0967748	0.391043	0.746314
NDUFA1	-0.176567	0.0448341	0.221401	0.85644	0.925077	0.311802	0.153938	-0.157864	0.829677	0.981817	0.0850798	-0.156494	-0.241574	0.159895	0.571642
RNF167	-0.0554465	0.0151081	0.0705546	0.85644	0.925077	-0.00464466	-0.142073	-0.137429	0.543719	0.931623	0.00818391	-0.0429979	-0.0511818	0.874183	0.96198
HS.534439	-0.0412884	-0.149014	-0.107726	0.85644	0.925077	-0.0863627	-0.0428508	0.0435119	0.597071	0.93843	0.0821794	0.0449949	-0.0371845	0.82454	0.942774
TP53I13	-0.00736453	-0.0183038	-0.0109393	0.882336	0.940377	0.0204763	-0.0205639	-0.0410402	0.316299	0.874271	0.00537406	-0.00708831	-0.0124624	0.446115	0.772962
LOC646483	-0.294056	-0.102597	0.191459	0.882336	0.940377	-0.0299398	0.102334	0.132273	0.769219	0.976213	0.277793	0.109252	-0.168541	0.27918	0.670647
LOC441377	-0.12461	-0.0486189	0.0759916	0.882336	0.940377	0.122367	-0.154074	-0.276442	0.356113	0.880912	0.101096	-0.147767	-0.248863	0.0955325	0.505194
GMEB2	0.0268252	0.0356449	0.00881972	0.882336	0.940377	-0.0733002	0.0805322	0.153832	0.200105	0.846944	-0.116875	-0.025924	0.0909509	0.225876	0.627753
LOC649841	-0.138956	-0.174372	-0.0354159	0.882336	0.940377	0.0189475	0.00745029	-0.0114972	1	1	-0.0826847	-0.0946002	-0.0119155	0.751397	0.91331
SYAP1	0.0651661	0.058655	-0.00651105	0.882336	0.940377	-0.0448262	-0.0860529	-0.0412266	0.799303	0.976213	-0.0904946	-0.0175696	0.072925	0.465384	0.787534
BCL3	0.088769	0.0573118	-0.0314572	0.882336	0.940377	-0.200249	-0.234138	-0.0338887	0.68113	0.958743	-0.223552	-0.212208	0.0113436	0.5258	0.830699
FAM113B	-0.061767	-0.164312	-0.102545	0.882336	0.940377	0.00577457	0.0925924	0.0868178	0.652614	0.950221	0.0430144	0.102714	0.0596998	0.568138	0.848307
PFN1	0.0430717	0.0271107	-0.0159609	0.882336	0.940377	0.0112372	-0.0439986	-0.0552358	0.597071	0.93843	0.0371685	-0.105974	-0.143142	0.634461	0.876846
NDUFA12	0.0274993	-0.0382078	-0.0657071	0.882336	0.940377	0.0584276	0.00696745	-0.0514601	0.335838	0.874328	0.0376267	-0.105576	-0.143203	0.109319	0.512285
FTHL2	0.019945	-0.0127384	-0.0326834	0.882336	0.940377	0.0559209	-0.0589592	-0.11488	0.039657	0.814322	0.058959	-0.051736	-0.110695	0.116762	0.523025
ZC3HC1	0.000790967	-0.0344672	-0.0352581	0.882336	0.940377	0.00722042	0.0524736	0.0452532	0.335838	0.874328	0.0451353	0.0167919	-0.0283434	0.611998	0.865435
DEDD2	0.0162005	0.013983	-0.00221747	0.882336	0.940377	-0.151185	-0.112892	0.038293	0.953226	0.997776	-0.210549	-0.0679567	0.142592	0.356674	0.722359
HMGN2	-0.0314401	-0.0217227	0.00971743	0.882336	0.940377	0.0067919	-0.0350036	-0.0417955	0.398851	0.886789	0.00762012	-0.00729281	-0.0149129	0.775571	0.918503
ERH	-0.00397327	0.00646896	0.0104422	0.882336	0.940377	0.0686781	0.14404	0.0753621	0.799303	0.976213	0.115023	0.0890618	-0.0259615	0.568138	0.848307
KIAA0430	0.181148	-0.0622465	-0.243394	0.882336	0.940377	-0.0299069	0.0648954	0.0948022	0.652614	0.950221	-0.0525764	0.0256085	0.0781849	0.238485	0.647439
HEBP1	0.191317	0.135984	-0.0553336	0.882336	0.940377	0.146373	0.0577844	-0.0885883	0.377121	0.880912	0.0332205	0.0726834	0.0394629	0.465384	0.787534
DCI	0.0222959	0.0501634	0.0278675	0.882336	0.940377	0.0355777	-0.0036591	-0.0392368	0.335838	0.874328	0.0176595	0.0552844	0.0376248	0.611998	0.865435
FAM73A	-0.0124265	-0.0521703	-0.0397438	0.882336	0.940377	-0.0513334	-0.0884083	-0.0370749	0.398851	0.886789	-0.110287	-0.0888865	0.0214008	0.485095	0.803917
C6ORF160	-0.0539323	-0.134827	-0.0808949	0.908356	0.954745	0.0276603	0.0653453	0.0376851	0.73947	0.97592	0.0348059	0.0173371	-0.0174688	0.465384	0.787534
C13ORF15	-0.271068	-0.297519	-0.0264514	0.908356	0.954745	0.0373344	0.154202	0.116868	0.799303	0.976213	0.1575	0.13901	-0.0184899	1	1
LOC730994	-0.047045	-0.0718025	-0.0247574	0.908356	0.954745	-0.101407	-0.00319127	0.0982155	0.398851	0.886789	-0.166656	-0.236229	-0.0695728	0.727457	0.902948
CCDC89	-0.0208753	0.0339416	0.0548168	0.908356	0.954745	0.0219413	0.0166271	-0.00531424	0.953226	0.997776	-0.00579335	-0.0438946	-0.0381012	0.680367	0.896366
TXNIP	-0.125036	0.00493683	0.129973	0.908356	0.954745	0.101401	0.0137151	-0.0876861	0.316299	0.874271	0.0833057	0.127691	0.0443853	0.657257	0.88978
COX7A2	-0.0979215	0.0636746	0.161596	0.908356	0.954745	0.0573249	0.335674	0.278349	1	1	0.239021	0.111671	-0.12735	0.308723	0.699681
LOC399900	-0.0773508	-0.134551	-0.0572002	0.908356	0.954745	-0.0529178	-0.103211	-0.0502934	0.860302	0.985143	-0.160676	-0.284221	-0.123545	0.974738	0.995658
SLC27A3	0.174867	0.170116	-0.00475092	0.908356	0.954745	0.0174156	0.0495487	0.0321331	0.860302	0.985143	0.0491766	0.0473793	-0.00179728	0.446115	0.772962
LGALS1	-0.032006	-0.0427075	-0.0107016	0.908356	0.954745	0.155113	0.0257446	-0.129368	0.829677	0.981817	-0.0260772	-0.229782	-0.203705	0.265134	0.667436
RNF130	0.00791478	-0.0591867	-0.0671015	0.908356	0.954745	-0.0635528	-0.129996	-0.0664436	0.517936	0.931623	0.00671313	-0.0546276	-0.0613407	0.775571	0.918503
LOC441087	-0.128699	-0.1498	-0.0211005	0.908356	0.954745	0.0243297	-0.210551	-0.234881	0.468278	0.920241	-0.267993	-0.291498	-0.0235044	1	1
PTAFR	0.0192329	0.0401165	0.0208836	0.908356	0.954745	-0.151437	-0.14541	0.00602701	0.68113	0.958743	-0.0585077	-0.130695	-0.0721878	0.611998	0.865435
MAN2B2	-0.03257	0.0109255	0.0434955	0.908356	0.954745	0.013953	0.0606589	0.0467059	0.799303	0.976213	-0.0624104	0.142043	0.204453	0.25157	0.658318
ASGR1	0.0851049	0.143243	0.0581378	0.908356	0.954745	0.0223603	0.0666375	0.0442772	0.953226	0.997776	-0.0194862	-0.0107135	0.00877271	0.546771	0.838603
CALM1	-0.16434	-0.139922	0.0244181	0.908356	0.954745	0.0600724	0.087907	0.0278346	0.652614	0.950221	-0.00328289	0.0342588	0.0375417	0.446115	0.772962
SMAP2	0.139583	0.0776619	-0.0619206	0.908356	0.954745	-0.119627	-0.0284986	0.0911283	0.200105	0.846944	-0.221172	-0.122984	0.0981878	0.116762	0.523025
FRAT2	-0.0501605	-0.0350483	0.0151122	0.908356	0.954745	-0.115102	-0.223759	-0.108657	0.543719	0.931623	-0.15639	0	0.15639	0.450788	0.78017
HDC	0.0474048	-0.0218684	-0.0692732	0.908356	0.954745	0.114833	0.187832	0.072999	0.597071	0.93843	0.0439053	-0.0412583	-0.0851636	0.899199	0.967831
COX7C	-0.192442	0.00503538	0.197478	0.908356	0.954745	0.158024	0.302749	0.144725	0.799303	0.976213	0.477753	0.343056	-0.134697	0.102246	0.512239
UBE2F	0.0161159	0.0733787	0.0572628	0.908356	0.954745	0.0575889	0.0265524	-0.0310365	0.922122	0.992503	0.125326	0.0254984	-0.0998278	0.568138	0.848307
LOC649143	0.0603598	0.0595329	-0.000826879	0.934471	0.964881	0.0935819	-0.00716754	-0.100749	0.127763	0.841935	0.00404967	-0.0261482	-0.0301978	0.703774	0.899201
CLC	-0.219095	0.125558	0.344652	0.934471	0.964881	0.19478	0.244054	0.0492739	0.710093	0.971673	0.339463	0.0643471	-0.275116	0.27918	0.670647
LOC653773	-0.0533836	-0.0153571	0.0380265	0.934471	0.964881	0.131492	0.179526	0.0480334	0.922122	0.992503	0.119639	0.118438	-0.0012009	0.899199	0.967831
PPP1R15A	0.116643	0.0257762	-0.0908669	0.934471	0.964881	-0.244468	-0.168918	0.0755497	0.421297	0.90244	-0.175035	-0.0166815	0.158353	0.0891672	0.497442
LOC285053	-0.111441	-0.116992	-0.0055517	0.934471	0.964881	0.156718	0.00649157	-0.150226	0.211119	0.846944	0.0268077	0.0228601	-0.00394759	0.465384	0.787534
FKBP1A	0.0587791	0.0719513	0.0131722	0.934471	0.964881	-0.00310356	-0.0657175	-0.062614	0.398851	0.886789	-0.105692	-0.0670902	0.0386018	0.324223	0.714605
VTI1B	-0.0228337	0.102806	0.12564	0.934471	0.964881	-0.0286419	0.0316248	0.0602666	0.279439	0.864679	-0.0168307	-0.0175672	-0.000736497	0.657257	0.88978
CD2	-0.284573	-0.294214	-0.00964063	0.934471	0.964881	0.163334	-0.00475756	-0.168092	0.468278	0.920241	0.0702101	-0.101211	-0.171421	0.213737	0.618861
IGF2BP2	0.0884852	0.17439	0.0859043	0.934471	0.964881	0.00597482	-0.0170886	-0.0230634	0.922122	0.992503	0.0571905	0.108663	0.0514723	0.37362	0.733278
AXUD1	0.042955	0.178489	0.135534	0.934471	0.964881	-0.0568411	-0.169169	-0.112327	0.356113	0.880912	-0.194422	-0.10336	0.0910616	0.265134	0.667436
RPL41	-0.134253	-0.0494387	0.0848148	0.934471	0.964881	0.0344077	0.164641	0.130234	0.73947	0.97592	0.292745	0.135549	-0.157197	0.225876	0.627753
RPUSD2	0.0518244	-0.0138354	-0.0656598	0.934471	0.964881	0.0223793	0.0970622	0.0746829	0.398851	0.886789	0.0631562	0.0272484	-0.0359078	0.974738	0.995658
PLDN	-0.0211059	-0.013203	0.00790292	0.934471	0.964881	0.0111364	-0.065993	-0.0771294	0.543719	0.931623	0.0129488	-0.0170063	-0.0299551	0.703774	0.899201
CD14	0.0921012	0.190534	0.0984325	0.934471	0.964881	-0.0428268	-0.0505611	-0.00773427	0.891131	0.988487	0.031534	0.154906	0.123372	0.308723	0.699681
LOC649049	-0.353485	-0.256544	0.0969415	0.934471	0.964881	0.100094	0.0509103	-0.0491835	1	1	0.251956	-0.0754905	-0.327447	0.356674	0.722359
Septin 9	-0.0646381	-0.0712723	-0.0066342	0.934471	0.964881	0.0230905	0.172882	0.149791	0.468278	0.920241	-0.00979438	0.0953972	0.105192	0.505237	0.815988
GNG11	-0.0564303	0.0628298	0.11926	0.934471	0.964881	0.121515	0.159184	0.0376695	1	1	0.282799	0.175492	-0.107306	0.680367	0.896366
TMEM149	0.148604	0.105617	-0.0429875	0.934471	0.964881	0.0730557	-0.0708817	-0.143937	0.138203	0.841935	0.0152893	-0.0933259	-0.108615	0.849289	0.952479
ALOX5AP	-0.0428561	-0.0730733	-0.0302172	0.934471	0.964881	-0.166622	-0.107515	0.0591076	0.984401	1	-0.0873544	-0.0956415	-0.0082871	1	1
ATP6V1E1	0.0885087	0.0513088	-0.0371999	0.934471	0.964881	0.0344729	0.115585	0.081112	0.624584	0.950221	0.12224	0.163542	0.0413023	0.974738	0.995658
LOC391045	-0.0523374	-0.0432736	0.00906381	0.934471	0.964881	0.0256286	-0.0711739	-0.0968025	0.214532	0.846944	-0.0617329	0.00348385	0.0652168	0.568138	0.848307
FOXJ3	-0.0363403	-0.0166246	0.0197157	0.934471	0.964881	0.0712813	0.0580624	-0.0132189	0.799303	0.976213	-0.0574363	0.160191	0.217628	0.340207	0.722359
SHISA5	0.198607	0.0944501	-0.104157	0.934471	0.964881	-0.147807	-0.0970158	0.050791	1	1	-0.0987958	-0.265284	-0.166488	0.874183	0.96198
RPS17	-0.438895	-0.0502308	0.388665	0.934471	0.964881	0.251646	0.432076	0.18043	0.829677	0.981817	0.649975	0.574688	-0.0752862	0.25157	0.658318
EEF1G	-0.242906	-0.297499	-0.0545924	0.934471	0.964881	0.0881525	0.0740004	-0.0141521	0.891131	0.988487	0.115661	0.0370618	-0.0785989	0.324223	0.714605
RPL21	-0.357362	-0.0325281	0.324833	0.934471	0.964881	0.361107	0.184149	-0.176958	0.652614	0.950221	0.797208	0.347897	-0.44931	0.27918	0.670647
LOC652616	0.233684	0.0853658	-0.148318	0.960655	0.978647	-0.14763	-0.222851	-0.0752215	0.543719	0.931623	-0.15415	-0.165755	-0.011605	0.657257	0.88978
NDUFB8	-0.0706298	-0.0448879	0.0257418	0.960655	0.978647	0.0195733	0.0183733	-0.00120004	1	1	-0.0717086	-0.0800981	-0.0083895	0.446115	0.772962
LOC642250	-0.217859	-0.0377669	0.180092	0.960655	0.978647	0.211073	0.162198	-0.0488754	0.570107	0.931623	0.40321	0.330506	-0.0727037	0.265134	0.667436
LOC652624	-0.208921	-0.171049	0.0378725	0.960655	0.978647	-0.0185084	0.0721681	0.0906765	0.860302	0.985143	0.124267	0.0704423	-0.0538251	0.465384	0.787534
TOMM7	-0.254663	-0.107826	0.146837	0.960655	0.978647	0.212832	0.314849	0.102017	0.922122	0.992503	0.545691	0.282489	-0.263201	0.340207	0.722359
LOC643287	0.0577526	0.00748377	-0.0502688	0.960655	0.978647	-0.0343666	0.00821604	0.0425826	0.468278	0.920241	-0.0513458	0.00240143	0.0537472	0.775571	0.918503
LOC644934	-0.13548	-0.0397751	0.0957049	0.960655	0.978647	0.0994948	-0.0341772	-0.133672	0.279439	0.864679	0.0592783	-0.277006	-0.336285	0.0891672	0.497442
IL8RB	0	0.105438	0.105438	0.960655	0.978647	-0.133013	-0.203509	-0.0704957	0.891131	0.988487	-0.210673	-0.202294	0.00837922	0.5258	0.830699
FCRLA	-0.105576	-0.0353864	0.0701897	0.960655	0.978647	-0.0136307	-0.0622105	-0.0485798	0.799303	0.976213	0.224847	0.220114	-0.00473295	0.568138	0.848307
ALPL	0.0171683	-0.0041064	-0.0212747	0.960655	0.978647	-0.378817	-0.366713	0.0121045	0.769219	0.976213	-0.202876	-0.123195	0.0796812	0.727457	0.902948
RARRES3	0.235531	0.2969	0.0613692	0.960655	0.978647	0.192778	-0.0197374	-0.212515	0.099995	0.841935	-0.00150573	-0.0848069	-0.0833012	0.225876	0.627753
F13A1	0.104523	-0.048418	-0.152941	0.960655	0.978647	-0.0508333	0.107103	0.157936	0.922122	0.992503	0.0428879	0.0423826	-0.000505297	0.775571	0.918503
GPBAR1	0.334791	0.341978	0.00718652	0.960655	0.978647	0.0453386	0.0714445	0.0261059	0.624584	0.950221	-0.149973	-0.0696855	0.0802874	0.849289	0.952479
ZNFX1	0.170244	0.308756	0.138512	0.960655	0.978647	-0.159545	0.0140451	0.17359	0.769219	0.976213	-0.193304	-0.131446	0.0618589	0.37362	0.733278
TNFRSF1B	0.0357809	-0.0109527	-0.0467337	0.960655	0.978647	-0.042922	-0.149863	-0.106941	0.68113	0.958743	-0.232969	-0.0120839	0.220885	0.0177645	0.39589
LOC651436	-0.189491	-0.0279963	0.161494	0.960655	0.978647	0.297483	0.262637	-0.0348458	0.922122	0.992503	0.703091	0.36195	-0.341141	0.132801	0.55872
BRI3	-0.00984962	0.123743	0.133593	0.960655	0.978647	-0.136698	-0.197413	-0.0607153	0.245529	0.851802	-0.0987116	-0.124751	-0.0260391	0.82454	0.942774
C19ORF50	0.0243827	0.0220238	-0.00235887	0.960655	0.978647	-0.0278775	-0.117965	-0.0900875	0.200105	0.846944	-0.0467401	-0.168848	-0.122108	0.0955325	0.505194
RBM12B	-0.0406051	-0.0709767	-0.0303716	0.960655	0.978647	-0.117552	-0.0028964	0.114656	0.149269	0.842492	-0.0575594	0.0185694	0.0761288	0.293709	0.683974
RPL5	-0.104729	-0.119097	-0.0143672	0.960655	0.978647	0.131606	0.195982	0.0643755	0.984401	1	0.227724	0.0406972	-0.187027	0.159895	0.571642
RPS28	-0.222078	-0.143272	0.0788054	0.98688	0.992092	0.123131	-0.0596641	-0.182795	0.492781	0.927696	0.148536	-0.134316	-0.282852	0.465384	0.787534
LSP1	0.0150356	0.0301897	0.015154	0.98688	0.992092	-0.00879305	-0.0694296	-0.0606366	0.73947	0.97592	-0.0449646	-0.0492416	-0.00427704	0.703774	0.899201
LOC387841	-0.206185	-0.251524	-0.0453394	0.98688	0.992092	-0.0707198	0.12123	0.19195	0.316299	0.874271	0.18036	0.0678277	-0.112532	0.408937	0.756757
LOC650152	0	0.0219528	0.0219528	0.986699	0.992092	0.00274549	0.0229121	0.0201666	0.652614	0.950221	0.0804582	0.0755251	-0.00493308	0.849289	0.952479
UQCRQ	-0.183726	0.0559527	0.239678	0.98688	0.992092	0.0657706	0.283714	0.217943	0.829677	0.981817	0.24462	0.0975888	-0.147032	0.150446	0.571395
CCND3	0.0532758	0.0886577	0.0353819	0.98688	0.992092	0.0644018	0.194277	0.129876	0.17334	0.846944	-0.10712	0.0813662	0.188486	0.356674	0.722359
LOC649946	0.00314744	0.00708518	0.00393774	0.98688	0.992092	0.0502904	-0.0115088	-0.0617992	0.335838	0.874328	0.00462933	-0.059767	-0.0643964	0.634461	0.876846
TRIM21	0.342436	0.377258	0.0348225	0.98688	0.992092	-0.0831927	-0.0592384	0.0239542	0.398851	0.886789	-0.136672	-0.164137	-0.0274652	0.949501	0.984405
POLR2H	-0.0835384	-0.0927103	-0.00917192	0.98688	0.992092	0.0581456	0.0765233	0.0183777	0.73947	0.97592	0.0571364	0.0331128	-0.0240236	0.25157	0.658318
DNAJC8	-0.0339013	-0.0576291	-0.0237278	0.98688	0.992092	0.0904298	0.123837	0.0334075	0.953226	0.997776	0.242156	0.159204	-0.0829527	0.265134	0.667436
NDEL1	-0.0458356	0.0159302	0.0617658	0.98688	0.992092	-0.144952	-0.16738	-0.0224276	1	1	-0.0673753	-0.0792985	-0.0119232	0.27918	0.670647
TACC3	-0.0605864	-0.0564193	0.00416708	0.98688	0.992092	-0.115007	-0.152741	-0.0377344	0.597071	0.93843	-0.135215	-0.176435	-0.0412202	0.949501	0.984405
CHPT1	-0.0682158	-0.0342817	0.0339342	0.98688	0.992092	-0.0292881	-0.0793358	-0.0500477	0.829677	0.981817	0.0516188	0.0786639	0.027045	0.703774	0.899201
INPP5D	0.0827682	-0.0869309	-0.169699	0.98688	0.992092	0.0230616	-0.164047	-0.187109	0.624584	0.950221	-0.168901	-0.146041	0.0228599	0.949501	0.984405
NDUFA4	-0.0298526	-0.018708	0.0111446	0.98688	0.992092	0.175074	0.162627	-0.0124467	0.953226	0.997776	0.429331	0.282205	-0.147126	0.150446	0.571395
HLA-E	0.150021	0.18081	0.0307886	0.98688	0.992092	-0.171272	-0.0533444	0.117928	0.335838	0.874328	-0.130294	0.0465408	0.176835	0.0302791	0.411742
RPS23	-0.139702	-0.111777	0.0279259	0.98688	0.992092	-0.00522412	0.0852016	0.0904257	0.468278	0.920241	-0.0199004	0.108406	0.128306	0.238485	0.647439
PIGM	-0.0311749	-0.00219095	0.028984	0.98688	0.992092	-0.0207434	-0.0497809	-0.0290375	0.710093	0.971673	0.00903993	-0.0239228	-0.0329627	0.408937	0.756757
S100P	-0.13702	-0.0533593	0.0836606	0.98688	0.992092	-0.152962	-0.0995823	0.0533799	0.799303	0.976213	-0.0922489	-0.0681981	0.0240508	0.703774	0.899201
FAM129A	0.146402	-0.0349444	-0.181347	0.98688	0.992092	-0.245495	-0.105166	0.140329	0.398851	0.886789	-0.253912	-0.1178	0.136113	0.340207	0.722359
SOD1	-0.038797	-0.0708816	-0.0320846	1	1	0.0963543	0.0996004	0.00324616	0.984401	1	0.0954363	-0.043026	-0.138462	0.27918	0.670647
S100A4	-0.0240345	-0.014831	0.00920343	1	1	-0.0035797	-0.0510412	-0.0474615	0.624584	0.950221	-0.0266316	-0.110358	-0.0837262	0.703774	0.899201
FLOT2	0.0947914	0.00958533	-0.085206	1	1	-0.122641	-0.0745901	0.0480508	0.984401	1	-0.0763045	-0.0698358	0.00646874	0.657257	0.88978
RPS27A	-0.246555	-0.224834	0.0217205	1	1	-0.00868436	-0.00158461	0.00709975	0.799303	0.976213	0.0623626	-0.101999	-0.164362	0.391043	0.746314
DOCK2	0.182962	0.0733135	-0.109649	1	1	0.0627885	0.115076	0.0522875	0.22967	0.846944	0.0557111	0.0121328	-0.0435783	0.546771	0.838603
JUND	0.0562098	0.0439913	-0.0122186	1	1	0.0343993	-0.276395	-0.310794	0.22967	0.846944	-0.1092	-0.147311	-0.0381102	0.899199	0.967831
LOC728643	-0.0103779	-0.0577972	-0.0474193	1	1	0.0662848	0.100209	0.0339242	0.769219	0.976213	0.0585047	0.129262	0.0707571	0.899199	0.967831
RPL35	-0.383949	-0.280988	0.102961	1	1	0.0353453	0.222129	0.186784	0.517936	0.931623	0.173576	0.0973517	-0.0762242	0.5258	0.830699
