# Supplementary material for: Exploring the Limitations of Peripheral Blood Transcriptional Biomarkers in Predicting Influenza Vaccine Responsiveness
Source: Hindawi journal article supplement (doi:10.1155/2017/3017632), 2017-01-01
Supplement: f1 [file 3017632.f1.zip › Supplementary_File_S4.xlsx]

## Sheet: TRS
VALIDATION DATASET (2007/8)
subject number	18	39	12	21	35	16	29	32	23
max ratio (day 28 / day 0)	1	2	16	16	16	32	32	64	512
subject classification	LOW	LOW	HIGH	HIGH	HIGH	HIGH	HIGH	HIGH	HIGH		LOW --> max ratio < 4; HIGH --> max ratio > 4; subjects with max ratio equal to 4 have been removed
hai titer (day 0) - a/ solomon islands/3/2006 (h1n1)	160	80	40	160	5	40	40	40	5
hai titer (day 28) - a/ solomon islands/3/2006 (h1n1)	160	160	640	640	40	640	80	2560	2560
hai titer (day 0) - a/wisconsin/67/2005 (h3n2)	80	2560	80	5	40	5	5	20	5
hai titer (day 28) - a/wisconsin/67/2005 (h3n2)	80	2560	160	80	640	160	160	160	20
hai titer (day 0) - b/malaysia/2506/2004:	5	80	10	5	5	10	5	5	5
hai titer (day 28) - b/malaysia/2506/2004	5	80	10	5	5	20	40	80	5
ratio 1	1	2	16	4	8	16	2	64	512		Thresholds on max ratio
ratio 2	1	1	2	16	16	32	32	8	4		low responders:		2
ratio 3	1	1	1	1	1	2	8	16	1		high responders:		8
log2 deviation for ratio 1	1	0	1	-1	0	1	-2	3	6
log2 deviation for ratio 2	1	1	-2	1	1	2	2	0	-1
log2 deviation for ratio 3	1	1	-3	-3	-3	-2	0	1	-3
Sum of log2 deviations*	3	1	0	0	0	1	0	4	2		* the 2nd ratio has been discarded for subject 39 (outlier)
Penalty for high level of pre-existing antibodies	0	1	0	0	0	0	0	0	0
TRS (titer response score)	3	0	0	0	0	1	0	4	2
Node radius in the network	100	25	25	25	25	50	25	125	75		min radius length:		25
TRAINING DATASET (2008/9)
subject number	16	38	42	47	80	46	53	63	65	72	85	3	48	78	83	44	73	74	68	43	29
max ratio (day 28 / day 0)	1	1	1	1	1	2	8	8	8	8	8	16	16	16	16	32	32	32	64	64	128
subject classification (low has max ratio < 4)	LOW	LOW	LOW	LOW	LOW	LOW	HIGH	HIGH	HIGH	HIGH	HIGH	HIGH	HIGH	HIGH	HIGH	HIGH	HIGH	HIGH	HIGH	HIGH	HIGH
hai titer (day 0) - a/ solomon islands/3/2006 (h1n1)	5	5	5	640	5	320	5	5	20	5	5	5	5	5	5	20	5	5	5	5	5
hai titer (day 28) - a/ solomon islands/3/2006 (h1n1)	5	5	5	640	5	640	40	40	40	40	40	80	80	80	5	320	160	160	5	320	640
hai titer (day 0) - a/wisconsin/67/2005 (h3n2)	20	20	5	160	80	40	40	5	5	5	80	160	640	20	5	160	5	5	5	10	10
hai titer (day 28) - a/wisconsin/67/2005 (h3n2)	20	20	5	160	80	80	40	40	40	40	80	160	160	20	80	160	80	40	320	320	640
hai titer (day 0) - b/malaysia/2506/2004:	5	5	5	40	20	80	20	5	20	5	320	80	20	5	10	5	5	5	5	40	20
hai titer (day 28) - b/malaysia/2506/2004	5	5	5	40	20	80	160	5	20	5	40	80	160	5	80	160	80	5	5	160	80
ratio 1	1	1	1	1	1	2	8	8	2	8	8	16	16	16	1	16	32	32	1	64	128
ratio 2	1	1	1	1	1	2	1	8	8	8	1	1	0.25	1	16	1	16	8	64	32	64
ratio 3	1	1	1	1	1	1	8	1	1	1	0.125	1	8	1	8	32	16	1	1	4	4
log2 deviation for ratio 1	1	1	1	1	1	0	0	0	-2	0	0	1	1	1	-3	1	2	2	-3	3	4
log2 deviation for ratio 2	1	1	1	1	1	0	-3	0	0	0	-3	-3	-5	-3	1	-3	1	0	3	2	3
log2 deviation for ratio 3	1	1	1	1	1	1	0	-3	-3	-3	-6	-3	0	-3	0	2	1	-3	-3	-1	-1
Sum of log2 deviations	3	3	3	3	3	1	0	0	0	0	0	0	0	0	0	0	4	0	0	4	6
Penalty for high level of pre-existing antibodies	0	0	0	0	0	0	0	0	0	0	0	0	0	0	0	0	0	0	0	0	0
TRS (titer response score)	3	3	3	3	3	1	0	0	0	0	0	0	0	0	0	0	4	0	0	4	6
Node radius in the network	100	100	100	100	100	50	25	25	25	25	25	25	25	25	25	25	125	25	25	125	175
